# Supplementary material for: Teaching cyclopentadienyl how to leave: a case study of the [CpIr(COD)Br]+ complex
Source: Royal Society of Chemistry journal article supplement (doi:10.1039/d2nj00098a), 2022-01-01
Supplement: d2nj00098a2.pdf [file d2nj00098a2.pdf]

# Supporting Information

## New Journal of Chemistry

### Teaching cyclopentadienyl how to leave: a case study of $[\text{CpIr}(\text{COD})\text{Br}]^+$ complex

Aleksandr A. Chamkin

#### Table of Contents

|                                                                             |    |
|-----------------------------------------------------------------------------|----|
| <i>Computational Methods</i> .....                                          | 2  |
| <i>Supplementary Data for Discussion</i> .....                              | 4  |
| <i>Comparison of Optimized and XRD Geometries</i> .....                     | 6  |
| <i>Thermochemical Data</i> .....                                            | 7  |
| <i>Identifiers and Visual Representations of Optimized Structures</i> ..... | 12 |
| <i>References</i> .....                                                     | 20 |
| <i>Cartesian Coordinates of Optimized Structures</i> .....                  | 21 |

## Computational Methods

The computations for **the non-anionic systems** were performed as follows:

1. Geometry optimizations were carried out without symmetry constraints using M06-L density functional<sup>1</sup> and tight convergence criteria as implemented in the Gaussian 09 E.01 package.<sup>2</sup> The def2-TZVPP<sup>3</sup> all-electron triple-zeta basis set of the Karlsruhe group was used together with the corresponding fitting basis set<sup>4</sup> and effective core potentials. The D3 version of Grimme's dispersion correction with the original D3 damping function was applied.<sup>5</sup> A pruned (99, 590) integration grid (UltraFine) was used. Frequency calculations were performed to confirm the nature of the stationary points to yield one imaginary frequency for the transition states and none for the minima. Gas-phase thermochemical parameters at 298.15 K (E, H, and  $G_{\text{uncorr.}}$ ) were obtained from the frequency calculations.
2. The Gibbs free energies ( $G_{\text{uncorr.}}$ ) were corrected using the quasi-harmonic approximation<sup>6</sup> and to a solution-phase standard state as implemented in the GoodVibes 3.0.1 program<sup>7</sup> (corrected values were reported as G).
3. The solvent corrections were considered using the SMD solvation model<sup>8</sup> and acetone as a solvent. The corresponding calculations were performed on the gas-phase geometries, and the solvation energies were evaluated as the difference between the SMD ( $E_{\text{solv}}$ ) and gas-phase electronic energies; then, the obtained earlier thermochemical parameters were corrected using the solvation energies ( $H_{\text{solv}} = H + E_{\text{solv}} - E$ ;  $G_{\text{solv}} = G + E_{\text{solv}} - E$ ).<sup>9</sup>
4. The gas-phase domain-based local pair natural orbital coupled-cluster theory with single-, double-, and perturbative triple excitations (DLPNO-CCSD(T))<sup>10</sup> electronic energies ( $E_{\text{CC}}$ ) were obtained using "TightPNO" default convergence thresholds, and tight SCF convergence criteria as implemented in the ORCA 4.2.1 code.<sup>11</sup> The def2-TZVPP orbital basis set was used together with the corresponding auxiliary basis set for correlated methods (def2-TZVPP/C<sup>12</sup>). Additionally, the iterative full LMP2 guess was requested.
5. Finally, the solvent-corrected DLPNO-CCSD(T) Gibbs free energies were evaluated as  $G_{\text{CC}} = E_{\text{CC}} + G_{\text{solv}} - E$ . These values were used for the analysis and production of energy diagrams.

The corresponding computations for **the anionic systems** and for all **the systems involved in a reaction step together with an anionic system** (i.e., when the corresponding energies are subtracted; such cases are denoted with the quotation mark (') after an identifier) were performed using the abovementioned methods with the following differences:

1. Geometry optimizations were performed using the ORCA 4.2.1 code. The minimally augmented def2-TZVPP basis set (ma-def2-TZVPP<sup>13</sup>) was used. The other options were chosen similarly to the case of the non-anionic systems: M06-L density functional, tight geometry and SCF convergence criteria, Lebedev

590 points grid, D3 version of Grimme's dispersion correction, and SMD solvation model for acetone as a solvent. Additionally, the RI-J approximation with an automatically generated auxiliary basis set<sup>14</sup> was invoked.

2. The obtained gas-phase Gibbs free energies were not corrected manually using the quasi-harmonic approximation because ORCA performs this correction by default. The resulted values were corrected to a solution-phase standard state by adding  $+0.00301640938 \text{ Eh}$  (which is equal to  $R \times T \times \ln(24.46)$ , where 24.46 stands for the molar volume at 1 atm and 298.15 K). The corrected values were reported as G.

3. The DLPNO-CCSD(T) computations were performed using the ma-def2-TZVPP basis set and an automatically generated auxiliary basis set for correlated methods.

With the mean absolute deviations for the bond distances and angles of 0.021 Å and 1.73 ° (Table S2), respectively, the used approach provides the structures of the quality comparable to those from the classical hybrid<sup>15</sup> or recently developed functionals, such as r<sup>2</sup>SCAN-3c.<sup>16</sup>

The nuclei movements corresponding to the single imaginary frequencies were visualized and analyzed for all found transition states. In difficult cases (TS\_1\_IM8, TS\_IM1\_IM2, TS\_3\_IM13, TS\_IM9\_IM10), the reaction path was traced from the transition state to the product and back to the reactant by using the Intrinsic Reaction Coordinate method.<sup>17</sup> In the case of a barrierless step, the corresponding transition state cannot be localized (TS\_IM2\_IM3, TS\_IM7\_2, TS\_IM6\_IM7', TS\_IM13\_IM14, TS\_IM14\_IM15, TS\_IM15\_4), and the relaxed potential energy surface scan was performed to ensure that the surface was smooth (the single key geometrical parameter was varied with a step of 0.04 Å).

Supplementary Data for Discussion

Table S1. Changes in solvent-corrected DLPNO-CCSD(T) Gibbs free energies ( $\Delta G_{CC}$ ) given for reactions of complexes bearing different halogens, in kcal mol<sup>-1</sup>.

| <b>Reaction step</b>          | <b>X = Cl</b> | <b>X = Br</b> | <b>X = I</b> |
|-------------------------------|---------------|---------------|--------------|
| <b>1:X + PO → IM1:X</b>       | -5.25         | -6.12         | -4.21        |
| <b>TS( 1:X + PO → IM1:X )</b> | 17.23         | 16.11         | 17.25        |
| <b>IM1:X → IM2:X</b>          | 3.83          | 8.83          | 7.35         |
| <b>TS( IM1:X → IM2:X )</b>    | 18.51         | 21.79         | 14.87        |
| <b>1:X → IM8:X</b>            | 18.76         | 23.16         | 16.82        |
| <b>TS( 1:X → IM8:X )</b>      | 20.59         | 26.99         | 20.29        |
| <b>IM6:X' → IM7' + X'</b>     | 7.14          | 12.41         | 7.16         |

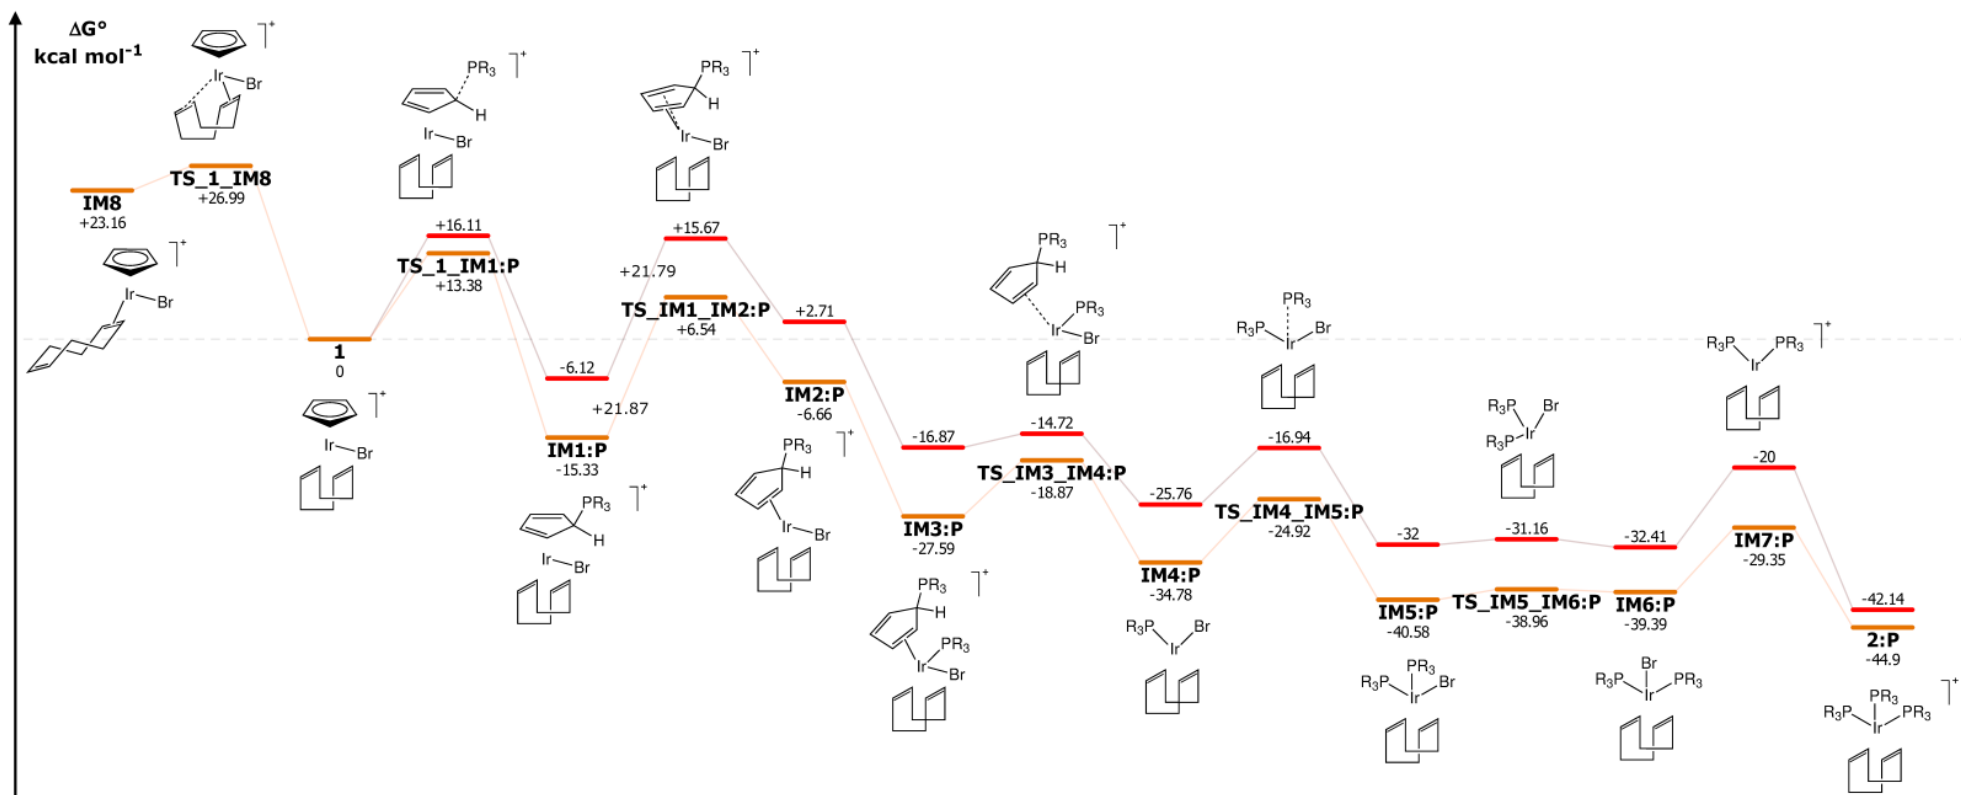

Figure S1. Energy diagram for reaction of **1** with phosphine ( $\text{PR}_3 = \text{PMe}_3$ ) leading to **2:P** (shown in orange). Corresponding levels for reaction with phosphite ( $\text{PR}_3 = \text{P(OMe)}_3$ ) are given in red for comparison.

*Comparison of Optimized and XRD Geometries*

Table S2. Selected bond lengths (d, Å) and angles ( $\omega$ , °) obtained from XRD and optimized structures. CCDC deposition numbers and references are provided for each compound. Cp and C=C stand for the centroids of Cp ring and carbon–carbon double bond, respectively. The mean absolute deviations for d and  $\omega$  are equal to 0.021 Å and 1.73 °, respectively.

| Parameter             | XRD value(s)        | Calculated value(s)                      | Deviation(s)        |
|-----------------------|---------------------|------------------------------------------|---------------------|
|                       |                     | <b>1</b> (CCDC 871722; <sup>18</sup> )   |                     |
| d(Ir–Br)              | 2.539               | 2.584                                    | 0.045               |
| d(Ir–Cp)              | 1.857               | 1.852                                    | –0.005              |
| d(Ir–C=C)             | 2.139; 2.149        | 2.130; 2.157                             | –0.009; 0.008       |
| $\omega$ (C=C–Ir–C=C) | 86.03               | 82.26                                    | –3.77               |
| $\omega$ (Cp–Ir–Br)   | 112.88              | 112.14                                   | –0.74               |
|                       |                     | <b>1:I</b> (CCDC 871723; <sup>18</sup> ) |                     |
| d(Ir–I)               | 2.720               | 2.800                                    | 0.080               |
| d(Ir–Cp)              | 2.225               | 2.207                                    | –0.018              |
| d(Ir–C=C)             | 2.151; 2.120        | 2.147; 2.120                             | –0.004; 0           |
| $\omega$ (C=C–Ir–C=C) | 83.42               | 82.42                                    | –1                  |
| $\omega$ (Cp–Ir–I)    | 114.80              | 110.71                                   | –4.09               |
|                       |                     | <b>2</b> (CCDC 1536381; <sup>19</sup> )  |                     |
| d(Ir–P)               | 2.318; 2.248; 2.269 | 2.332; 2.261; 2.300                      | 0.014; 0.013; 0.031 |
| d(Ir–C=C)             | 2.075; 2.192        | 2.078; 2.198;                            | 0.003; 0.006        |
| $\omega$ (C=C–Ir–C=C) | 82.08               | 81.95                                    | –0.13               |
|                       |                     | <b>4</b> (CCDC 1845090; <sup>20</sup> )  |                     |
| d(Ir–P)               | 2.233; 2.238        | 2.263; 2.272                             | 0.030; 0.034        |
| d(Ir–Br)              | 2.529               | 2.583                                    | 0.054               |
| d(Ir–Cp)              | 1.876               | 1.869                                    | –0.007              |
| $\omega$ (Cp–Ir–Br)   | 119.30              | 121.41                                   | 2.11                |
| $\omega$ (P–Ir–P)     | 93.63               | 93.35                                    | –0.28               |

*Thermochemical Data*

Table S3. Electronic energies (E), enthalpies (H), and Gibbs free energies (G) obtained without using (no subscript) and using SMD solvation model (“solv” subscript), gas-phase DLPNO-CCSD(T) electronic energies (E<sub>CC</sub>), and solvent-corrected DLPNO-CCSD(T) Gibbs free energies (G<sub>CC</sub>), in Hartree.

| Compound           | E            | H            | G            | E <sub>solv</sub> | H <sub>solv</sub> | G <sub>solv</sub> | E <sub>CC</sub> | G <sub>CC</sub> |
|--------------------|--------------|--------------|--------------|-------------------|-------------------|-------------------|-----------------|-----------------|
| <b>PO</b>          | -686.892593  | -686.753083  | -686.796436  | -686.898686       | -686.759176       | -686.802529       | -685.849233     | -685.759169     |
| <b>1</b>           | -3184.050377 | -3183.764932 | -3183.817888 | -3184.140672      | -3183.855227      | -3183.908183      | -3181.271342    | -3181.129148    |
| <b>TS_1_IM1</b>    | -3870.953513 | -3870.527556 | -3870.604928 | -3871.033670      | -3870.607713      | -3870.685085      | -3867.131078    | -3866.862650    |
| <b>IM1</b>         | -3870.976034 | -3870.548333 | -3870.624435 | -3871.062493      | -3870.634792      | -3870.710894      | -3867.163211    | -3866.898071    |
| <b>TS_IM1_IM2</b>  | -3870.947170 | -3870.521069 | -3870.596704 | -3871.030331      | -3870.604230      | -3870.679865      | -3867.130657    | -3866.863352    |
| <b>IM2</b>         | -3870.967050 | -3870.539815 | -3870.616755 | -3871.052675      | -3870.625440      | -3870.702380      | -3867.148669    | -3866.883999    |
| <b>IM3</b>         | -4557.917223 | -4557.347139 | -4557.444730 | -4557.993770      | -4557.423686      | -4557.521277      | -4553.070310    | -4552.674364    |
| <b>TS_IM3_IM4</b>  | -4557.913857 | -4557.345285 | -4557.443066 | -4557.993351      | -4557.424779      | -4557.522560      | -4553.062245    | -4552.670948    |
| <b>diene</b>       | -880.241955  | -880.011578  | -880.064553  | -880.319425       | -880.089048       | -880.142023       | -878.796285     | -878.696353     |
| <b>IM4</b>         | -3677.660125 | -3677.322730 | -3677.390950 | -3677.675686      | -3677.338291      | -3677.406511      | -3674.245798    | -3673.992184    |
| <b>TS_IM4_IM5</b>  | -4364.570573 | -4364.092775 | -4364.182059 | -4364.586714      | -4364.108916      | -4364.198200      | -4360.109676    | -4359.737303    |
| <b>IM5</b>         | -4364.583877 | -4364.104775 | -4364.194192 | -4364.598528      | -4364.119426      | -4364.208843      | -4360.136330    | -4359.761296    |
| <b>TS_IM5_IM6</b>  | -4364.583281 | -4364.105036 | -4364.192773 | -4364.597953      | -4364.119708      | -4364.207445      | -4360.135796    | -4359.759960    |
| <b>IM6</b>         | -4364.589668 | -4364.109938 | -4364.198639 | -4364.605218      | -4364.125488      | -4364.214189      | -4360.137433    | -4359.761954    |
| <b>IM6'</b>        | -4364.594876 | -4364.115274 | -4364.203677 | -4364.611050      | -4364.131447      | -4364.219850      | -4360.142613    | -4359.767588    |
| <b>Br'</b>         | -2574.137668 | -2574.132475 | -2574.148012 | -2574.222655      | -2574.217462      | -2574.232999      | -2572.783445    | -2572.878776    |
| <b>IM7</b>         | -1790.294347 | -1789.817111 | -1789.902770 | -1790.365612      | -1789.888376      | -1789.974035      | -1787.190636    | -1786.870324    |
| <b>IM7'</b>        | -1790.297921 | -1789.820918 | -1789.908029 | -1790.363231      | -1789.886229      | -1789.973339      | -1787.193619    | -1786.869038    |
| <b>2</b>           | -2477.249511 | -2476.629843 | -2476.736108 | -2477.310826      | -2476.691158      | -2476.797423      | -2473.116858    | -2472.664770    |
| <b>TS_1_IM8</b>    | -3184.012515 | -3183.729431 | -3183.784176 | -3184.108917      | -3183.825833      | -3183.880578      | -3181.218066    | -3181.086129    |
| <b>IM8</b>         | -3184.022140 | -3183.737497 | -3183.793595 | -3184.114117      | -3183.829474      | -3183.885572      | -3181.228805    | -3181.092237    |
| <b>IM1'</b>        | -3870.980065 | -3870.552624 | -3870.628631 | -3871.064479      | -3870.637038      | -3870.713045      | -3867.165628    | -3866.898609    |
| <b>IMs'</b>        | -1296.554205 | -1296.130180 | -1296.204362 | -1296.787462      | -1296.363438      | -1296.437620      | -1294.080944    | -1293.964359    |
| <b>3</b>           | -3380.717548 | -3380.284519 | -3380.352685 | -3380.801319      | -3380.368290      | -3380.436456      | -3377.523532    | -3377.242440    |
| <b>TS_3_IM9</b>    | -4067.599771 | -4067.027198 | -4067.118697 | -4067.680233      | -4067.107660      | -4067.199159      | -4063.368087    | -4062.967475    |
| <b>IM9</b>         | -4067.608848 | -4067.034313 | -4067.124595 | -4067.694370      | -4067.119835      | -4067.210117      | -4063.384417    | -4062.985686    |
| <b>TS_IM9_IM10</b> | -4067.579841 | -4067.006593 | -4067.096000 | -4067.665949      | -4067.092701      | -4067.182108      | -4063.351381    | -4062.953648    |
| <b>IM10</b>        | -4067.597476 | -4067.022660 | -4067.115951 | -4067.691369      | -4067.116553      | -4067.209844      | -4063.359365    | -4062.971733    |
| <b>IM11</b>        | -2990.686508 | -2990.491655 | -2990.536240 | -2990.711780      | -2990.516927      | -2990.561512      | -2988.308048    | -2988.183052    |

| Compound             | E            | H            | G            | E <sub>solv</sub> | H <sub>solv</sub> | G <sub>solv</sub> | E <sub>CC</sub> | G <sub>CC</sub> |
|----------------------|--------------|--------------|--------------|-------------------|-------------------|-------------------|-----------------|-----------------|
| <b>IM12</b>          | -1076.888988 | -1076.511141 | -1076.580273 | -1076.961553      | -1076.583706      | -1076.652838      | -1075.028237    | -1074.792087    |
| <b>TS_3_IM13</b>     | -3380.687102 | -3380.256571 | -3380.327069 | -3380.777034      | -3380.346503      | -3380.417001      | -3377.478339    | -3377.208238    |
| <b>IM13</b>          | -3380.695954 | -3380.263965 | -3380.336657 | -3380.782678      | -3380.350689      | -3380.423381      | -3377.488113    | -3377.215540    |
| <b>IM14</b>          | -4067.664730 | -4067.089660 | -4067.182458 | -4067.741938      | -4067.166868      | -4067.259666      | -4063.429186    | -4063.024122    |
| <b>COD</b>           | -312.098811  | -311.909388  | -311.945921  | -312.107963       | -311.918540       | -311.955073       | -311.447878     | -311.304140     |
| <b>IM15</b>          | -3755.532408 | -3755.149168 | -3755.227236 | -3755.610499      | -3755.227259      | -3755.305327      | -3751.933096    | -3751.706015    |
| <b>4</b>             | -4442.510873 | -4441.984718 | -4442.082183 | -4442.579736      | -4442.053581      | -4442.151046      | -4437.881997    | -4437.522170    |
| <b>P</b>             | -461.134409  | -461.013864  | -461.047678  | -461.137980       | -461.017435       | -461.051249       | -460.427146     | -460.343986     |
| <b>TS_1_IM1:P</b>    | -3645.196025 | -3644.789200 | -3644.858441 | -3645.279014      | -3644.872189      | -3644.941430      | -3641.706408    | -3641.451813    |
| <b>IM1:P</b>         | -3645.223419 | -3644.815303 | -3644.883202 | -3645.316927      | -3644.908811      | -3644.976710      | -3641.744270    | -3641.497561    |
| <b>TS_IM1_IM2:P</b>  | -3645.191285 | -3644.784928 | -3644.852979 | -3645.284893      | -3644.878536      | -3644.946587      | -3641.707407    | -3641.462709    |
| <b>IM2:P</b>         | -3645.211152 | -3644.803751 | -3644.872859 | -3645.307514      | -3644.900113      | -3644.969221      | -3641.725677    | -3641.483746    |
| <b>IM3:P</b>         | -4106.399766 | -4105.868684 | -4105.950993 | -4106.487859      | -4105.956777      | -4106.039086      | -4102.221776    | -4101.861096    |
| <b>TS_IM3_IM4:P</b>  | -4106.385788 | -4105.856244 | -4105.939162 | -4106.481904      | -4105.952360      | -4106.035278      | -4102.197698    | -4101.847188    |
| <b>diene:P</b>       | -654.486002  | -654.275397  | -654.320060  | -654.573790       | -654.363185       | -654.407848       | -653.373703     | -653.295549     |
| <b>IM4:P</b>         | -3451.894604 | -3451.576627 | -3451.636936 | -3451.912018      | -3451.594041      | -3451.654350      | -3448.817252    | -3448.576998    |
| <b>TS_IM4_IM5:P</b>  | -3913.038174 | -3912.598952 | -3912.673952 | -3913.055738      | -3912.616516      | -3912.691516      | -3909.251921    | -3908.905263    |
| <b>IM5:P</b>         | -3913.054411 | -3912.613574 | -3912.687299 | -3913.071035      | -3912.630198      | -3912.703923      | -3909.280715    | -3908.930227    |
| <b>TS_IM5_IM6:P</b>  | -3913.052480 | -3912.612495 | -3912.684994 | -3913.068219      | -3912.628234      | -3912.700733      | -3909.279399    | -3908.927652    |
| <b>IM6:P</b>         | -3913.055246 | -3912.613866 | -3912.687608 | -3913.073517      | -3912.632137      | -3912.705879      | -3909.277697    | -3908.928330    |
| <b>IM6:P'</b>        | -3913.059905 | -3912.618858 | -3912.692972 | -3913.077020      | -3912.635972      | -3912.710086      | -3909.280365    | -3908.930546    |
| <b>IM7:P</b>         | -1338.766901 | -1338.327476 | -1338.397124 | -1338.843552      | -1338.404127      | -1338.473775      | -1336.334793    | -1336.041667    |
| <b>IM7:P'</b>        | -1338.770715 | -1338.331284 | -1338.400935 | -1338.840215      | -1338.400784      | -1338.470435      | -1336.336045    | -1336.035765    |
| <b>2:P</b>           | -1799.942927 | -1799.380052 | -1799.462426 | -1800.014555      | -1799.451680      | -1799.534054      | -1796.819309    | -1796.410436    |
| <b>1:Cl</b>          | -1070.191223 | -1069.905643 | -1069.957744 | -1070.285167      | -1069.999587      | -1070.051688      | -1068.284401    | -1068.144866    |
| <b>TS_1_IM1:Cl</b>   | -1757.095516 | -1756.669415 | -1756.745857 | -1757.177556      | -1756.751455      | -1756.827897      | -1754.144202    | -1753.876583    |
| <b>IM1:Cl</b>        | -1757.118728 | -1756.690969 | -1756.766158 | -1757.207023      | -1756.779264      | -1756.854453      | -1754.176674    | -1753.912399    |
| <b>TS_IM1_IM2:Cl</b> | -1757.089967 | -1756.663634 | -1756.738028 | -1757.180423      | -1756.754090      | -1756.828484      | -1754.144385    | -1753.882902    |
| <b>IM2:Cl</b>        | -1757.112243 | -1756.684818 | -1756.760752 | -1757.204344      | -1756.776919      | -1756.852853      | -1754.165688    | -1753.906298    |
| <b>TS_1_IM8:Cl</b>   | -1070.155108 | -1069.871957 | -1069.926577 | -1070.262685      | -1069.979534      | -1070.034154      | -1068.233002    | -1068.112048    |
| <b>IM8:Cl</b>        | -1070.165108 | -1069.880308 | -1069.935400 | -1070.265295      | -1069.980495      | -1070.035587      | -1068.244489    | -1068.114968    |
| <b>IM6:Cl'</b>       | -2250.735465 | -2250.255747 | -2250.343222 | -2250.753933      | -2250.274214      | -2250.361689      | -2247.156407    | -2246.782630    |
| <b>Cl'</b>           | -460.270137  | -460.264944  | -460.279330  | -460.373898       | -460.368705       | -460.383091       | -459.789261     | -459.902215     |



| <b>Compound</b>        | <b>E</b>     | <b>H</b>     | <b>G</b>     | <b>E<sub>solv</sub></b> | <b>H<sub>solv</sub></b> | <b>G<sub>solv</sub></b> | <b>E<sub>CC</sub></b> | <b>G<sub>CC</sub></b> |
|------------------------|--------------|--------------|--------------|-------------------------|-------------------------|-------------------------|-----------------------|-----------------------|
| <b>I:I</b>             | -907.868297  | -907.583049  | -907.636786  | -907.961426             | -907.676178             | -907.729915             | -905.708722           | -905.570340           |
| <b>TS_1_IM1:I</b>      | -1594.769568 | -1594.343588 | -1594.421443 | -1594.852505            | -1594.426525            | -1594.504380            | -1591.567202          | -1591.302014          |
| <b>IM1:I</b>           | -1594.791025 | -1594.363602 | -1594.440758 | -1594.879079            | -1594.451656            | -1594.528812            | -1591.598433          | -1591.336220          |
| <b>TS_IM1_IM2:I</b>    | -1594.762878 | -1594.336954 | -1594.413364 | -1594.859252            | -1594.433328            | -1594.509738            | -1591.565670          | -1591.312530          |
| <b>IM2:I</b>           | -1594.779667 | -1594.352698 | -1594.430574 | -1594.873467            | -1594.446498            | -1594.524374            | -1591.579798          | -1591.324505          |
| <b>TS_1_IM8:I</b>      | -907.830066  | -907.546983  | -907.602304  | -907.941985             | -907.658902             | -907.714223             | -905.653848           | -905.538005           |
| <b>IM8:I</b>           | -907.839207  | -907.554857  | -907.611840  | -907.946440             | -907.662090             | -907.719073             | -905.663676           | -905.543542           |
| <b>IM6:I'</b>          | -2088.411441 | -2087.932088 | -2088.021334 | -2088.429261            | -2087.949909            | -2088.039155            | -2084.576775          | -2084.204490          |
| <b>I'</b>              | -297.964611  | -297.959417  | -297.975610  | -298.052069             | -298.046876             | -298.063068             | -297.225576           | -297.324034           |
| <b>bipy</b>            | -495.496995  | -495.329389  | -495.369744  | -495.509605             | -495.341999             | -495.382354             | -494.489891           | -494.375250           |
| <b>TS_1_IM1:bipy</b>   | -3679.557409 | -3679.103314 | -3679.176108 | -3679.641999            | -3679.187904            | -3679.260698            | -3675.776655          | -3675.479944          |
| <b>IM1:bipy</b>        | -3679.562014 | -3679.106149 | -3679.178476 | -3679.649831            | -3679.193966            | -3679.266293            | -3675.788115          | -3675.492394          |
| <b>TS_IM1_IM2:bipy</b> | -3679.518726 | -3679.064304 | -3679.135876 | -3679.607674            | -3679.153252            | -3679.224824            | -3675.741507          | -3675.447605          |
| <b>IM2:bipy</b>        | -3679.542711 | -3679.087266 | -3679.160451 | -3679.634687            | -3679.179242            | -3679.252427            | -3675.763064          | -3675.472780          |

Table S4. Changes in electronic energies (E), enthalpies (H), and Gibbs free energies (G) obtained without using (no subscript) and using SMD solvation model (“solv” subscript), changes in gas-phase DLPNO-CCSD(T) electronic energies ( $E_{CC}$ ) and solvent-corrected DLPNO-CCSD(T) Gibbs free energies ( $G_{CC}$ ), in kcal mol<sup>-1</sup>.

| Reaction step                      | $\Delta E$ | $\Delta H$ | $\Delta G$ | $\Delta E_{solv}$ | $\Delta H_{solv}$ | $\Delta G_{solv}$ | $\Delta E_{CC}$ | $\Delta G_{CC}$ |
|------------------------------------|------------|------------|------------|-------------------|-------------------|-------------------|-----------------|-----------------|
| <b>1 + PO =&gt; IM1</b>            | -20.75     | -19.02     | -6.34      | -14.52            | -12.79            | -0.11             | -26.75          | -6.12           |
| <b>TS( 1 + PO =&gt; IM1 )</b>      | -6.62      | -5.99      | 5.90       | 3.57              | 4.20              | 16.08             | -6.59           | 16.11           |
| <b>1 =&gt; IM8</b>                 | 17.72      | 17.22      | 15.24      | 16.66             | 16.16             | 14.19             | 26.69           | 23.16           |
| <b>TS( 1 =&gt; IM8 )</b>           | 23.76      | 22.28      | 21.15      | 19.93             | 18.45             | 17.32             | 33.43           | 26.99           |
| <b>IM1 =&gt; IM2</b>               | 5.64       | 5.35       | 4.82       | 6.16              | 5.87              | 5.34              | 9.12            | 8.83            |
| <b>TS( IM1 =&gt; IM2 )</b>         | 18.11      | 17.11      | 17.40      | 20.18             | 19.18             | 19.47             | 20.43           | 21.79           |
| <b>IM2 + PO =&gt; IM3</b>          | -36.13     | -34.04     | -19.79     | -26.61            | -24.52            | -10.27            | -45.44          | -19.58          |
| <b>IM3 =&gt; IM4 + diene</b>       | 9.50       | 8.05       | -6.76      | -0.84             | -2.29             | -17.10            | 17.71           | -8.89           |
| <b>TS( IM3 =&gt; IM4 + diene )</b> | 2.11       | 1.16       | 1.04       | 0.26              | -0.69             | -0.81             | 5.06            | 2.14            |
| <b>IM4 + PO =&gt; IM5</b>          | -19.55     | -18.17     | -4.27      | -15.16            | -13.78            | 0.12              | -25.92          | -6.24           |
| <b>TS( IM4 + PO =&gt; IM5 )</b>    | -11.20     | -10.64     | 3.34       | -7.74             | -7.18             | 6.80              | -9.19           | 8.82            |
| <b>IM5 =&gt; IM6</b>               | -3.63      | -3.24      | -2.79      | -4.20             | -3.80             | -3.35             | -0.69           | -0.41           |
| <b>TS( IM5 =&gt; IM6 )</b>         | 0.37       | -0.16      | 0.89       | 0.36              | -0.18             | 0.88              | 0.34            | 0.84            |
| <b>IM6' =&gt; IM7' + Br'</b>       | 99.95      | 101.58     | 92.64      | 15.79             | 17.42             | 8.48              | 103.88          | 12.41           |
| <b>IM7 + PO =&gt; 2</b>            | -39.26     | -37.43     | -23.16     | -29.20            | -27.36            | -13.09            | -48.31          | -22.14          |
| <b>IM1' =&gt; IMs' + Br'</b>       | 180.84     | 181.96     | 173.35     | 34.11             | 35.23             | 26.62             | 189.03          | 34.81           |
| <b>total from 1 to 2</b>           | -4.24      | 3.07       | 34.35      | -68.57            | -61.26            | -29.99            | -16.39          | -42.14          |
| <b>3 + PO =&gt; IM9</b>            | 0.81       | 2.06       | 15.39      | 3.54              | 4.79              | 18.11             | -7.31           | 9.99            |
| <b>TS( 3 + PO =&gt; IM9 )</b>      | 6.51       | 6.53       | 19.09      | 12.41             | 12.43             | 24.99             | 2.94            | 21.42           |
| <b>IM9 =&gt; IM10</b>              | 7.14       | 7.31       | 5.42       | 1.88              | 2.06              | 0.17              | 15.72           | 8.76            |
| <b>TS( IM9 =&gt; IM10 )</b>        | 18.20      | 17.39      | 17.94      | 17.83             | 17.03             | 17.58             | 20.73           | 20.10           |
| <b>IM9 =&gt; IM11 + IM12</b>       | 20.93      | 19.78      | 5.07       | 13.20             | 12.05             | -2.66             | 30.20           | 6.62            |
| <b>IM10 =&gt; IM11 + IM12</b>      | 13.79      | 12.46      | -0.35      | 11.32             | 9.99              | -2.83             | 14.48           | -2.14           |
| <b>3 =&gt; IM13</b>                | 13.55      | 12.90      | 10.06      | 11.70             | 11.04             | 8.20              | 22.23           | 16.88           |
| <b>TS( 3 =&gt; IM13 )</b>          | 19.11      | 17.54      | 16.07      | 15.24             | 13.67             | 12.21             | 28.36           | 21.46           |
| <b>IM13 + PO =&gt; IM14</b>        | -47.81     | -45.56     | -30.98     | -38.01            | -35.77            | -21.18            | -57.63          | -31.01          |
| <b>IM14 =&gt; IM15 + COD</b>       | 21.03      | 19.52      | 5.84       | 14.73             | 13.22             | -0.46             | 30.25           | 8.76            |
| <b>IM15 + PO =&gt; 4</b>           | -53.89     | -51.75     | -36.72     | -44.27            | -42.13            | -27.10            | -62.54          | -35.76          |
| <b>total from 3 to 4</b>           | -67.11     | -64.90     | -51.80     | -55.85            | -53.64            | -40.54            | -67.69          | -41.12          |

| Reaction step                            | $\Delta E$ | $\Delta H$ | $\Delta G$ | $\Delta E_{\text{solv}}$ | $\Delta H_{\text{solv}}$ | $\Delta G_{\text{solv}}$ | $\Delta E_{\text{CC}}$ | $\Delta G_{\text{CC}}$ |
|------------------------------------------|------------|------------|------------|--------------------------|--------------------------|--------------------------|------------------------|------------------------|
| <b>1 + P =&gt; IM1:P</b>                 | -24.24     | -22.91     | -11.07     | -24.02                   | -22.68                   | -10.84                   | -28.73                 | -15.33                 |
| <b>TS( 1 + P =&gt; IM1:P )</b>           | -7.05      | -6.53      | 4.47       | -0.23                    | 0.30                     | 11.30                    | -4.97                  | 13.38                  |
| <b>IM1:P =&gt; IM2:P</b>                 | 7.70       | 7.25       | 6.49       | 5.91                     | 5.46                     | 4.70                     | 11.67                  | 8.67                   |
| <b>TS( IM1:P =&gt; IM2:P )</b>           | 20.16      | 19.06      | 18.97      | 20.10                    | 19.00                    | 18.90                    | 23.13                  | 21.87                  |
| <b>IM2:P + P =&gt; IM3:P</b>             | -34.01     | -32.05     | -19.11     | -26.58                   | -24.62                   | -11.68                   | -43.27                 | -20.94                 |
| <b>IM3:P =&gt; IM4:P + diene:P</b>       | 12.02      | 10.45      | -3.77      | 1.29                     | -0.28                    | -14.50                   | 19.34                  | -7.19                  |
| <b>TS( IM3:P =&gt; IM4:P + diene:P )</b> | 8.77       | 7.81       | 7.42       | 3.74                     | 2.77                     | 2.39                     | 15.11                  | 8.73                   |
| <b>IM4:P + P =&gt; IM5:P</b>             | -15.94     | -14.48     | -1.68      | -13.20                   | -11.75                   | 1.05                     | -22.79                 | -5.80                  |
| <b>TS( IM4:P + P =&gt; IM5:P )</b>       | -5.75      | -5.31      | 6.69       | -3.60                    | -3.16                    | 8.84                     | -4.72                  | 9.87                   |
| <b>IM5:P =&gt; IM6:P</b>                 | -0.52      | -0.18      | -0.19      | -1.56                    | -1.22                    | -1.23                    | 1.89                   | 1.19                   |
| <b>TS( IM5:P =&gt; IM6:P )</b>           | 1.21       | 0.68       | 1.45       | 1.77                     | 1.23                     | 2.00                     | 0.83                   | 1.62                   |
| <b>IM6:P' =&gt; IM7:P' + Br'</b>         | 95.08      | 97.33      | 90.38      | 8.88                     | 11.12                    | 4.17                     | 100.95                 | 10.04                  |
| <b>IM7:P + P =&gt; 2:P</b>               | -26.12     | -24.29     | -11.06     | -20.72                   | -18.90                   | -5.67                    | -36.00                 | -15.55                 |
| <b>total from 1 to 2:P</b>               | 13.97      | 21.11      | 49.98      | -70.01                   | -62.86                   | -34.00                   | 3.07                   | -44.90                 |
| <b>1:Cl + PO =&gt; IM1:Cl</b>            | -21.91     | -20.23     | -7.52      | -14.54                   | -12.86                   | -0.15                    | -27.01                 | -5.25                  |
| <b>TS( 1:Cl + PO =&gt; IM1:Cl )</b>      | -7.34      | -6.71      | 5.22       | 3.95                     | 4.59                     | 16.52                    | -6.63                  | 17.23                  |
| <b>1:Cl =&gt; IM8:Cl</b>                 | 16.39      | 15.90      | 14.02      | 12.47                    | 11.98                    | 10.10                    | 25.05                  | 18.76                  |
| <b>TS( 1:Cl =&gt; IM8:Cl )</b>           | 22.66      | 21.14      | 19.56      | 14.11                    | 12.58                    | 11.00                    | 32.25                  | 20.59                  |
| <b>IM1:Cl =&gt; IM2:Cl</b>               | 4.07       | 3.86       | 3.39       | 1.68                     | 1.47                     | 1.00                     | 6.89                   | 3.83                   |
| <b>TS( IM1:Cl =&gt; IM2:Cl )</b>         | 18.05      | 17.15      | 17.65      | 16.69                    | 15.80                    | 16.30                    | 20.26                  | 18.51                  |
| <b>IM6:Cl' =&gt; IM7' + Cl'</b>          | 105.05     | 106.60     | 97.80      | 10.54                    | 12.10                    | 3.30                     | 108.89                 | 7.14                   |
| <b>1:I + PO =&gt; IM1:I</b>              | -18.91     | -17.24     | -4.73      | -11.90                   | -10.23                   | 2.28                     | -25.40                 | -4.21                  |
| <b>TS( 1:I + PO =&gt; IM1:I )</b>        | -5.45      | -4.68      | 7.39       | 4.77                     | 5.54                     | 17.61                    | -5.80                  | 17.25                  |
| <b>1:I =&gt; IM8:I</b>                   | 18.25      | 17.69      | 15.65      | 9.40                     | 8.84                     | 6.80                     | 28.27                  | 16.82                  |
| <b>TS( 1:I =&gt; IM8:I )</b>             | 23.99      | 22.63      | 21.64      | 12.20                    | 10.84                    | 9.85                     | 34.43                  | 20.29                  |
| <b>IM1:I =&gt; IM2:I</b>                 | 7.13       | 6.84       | 6.39       | 3.52                     | 3.24                     | 2.78                     | 11.69                  | 7.35                   |
| <b>TS( IM1:I =&gt; IM2:I )</b>           | 17.66      | 16.72      | 17.19      | 12.44                    | 11.50                    | 11.97                    | 20.56                  | 14.87                  |
| <b>IM6:I' =&gt; IM7' + I'</b>            | 93.44      | 95.23      | 86.41      | 8.76                     | 10.54                    | 1.72                     | 98.88                  | 7.16                   |
| <b>1 + bipy =&gt; IM1:bipy</b>           | -9.19      | -7.42      | 5.75       | 0.28                     | 2.05                     | 15.21                    | -16.87                 | 7.53                   |
| <b>TS( 1 + bipy =&gt; IM1:bipy )</b>     | -6.30      | -5.64      | 7.23       | 5.19                     | 5.85                     | 18.72                    | -9.68                  | 15.35                  |
| <b>IM1:bipy =&gt; IM2:bipy</b>           | 12.11      | 11.85      | 11.31      | 9.50                     | 9.24                     | 8.70                     | 15.72                  | 12.31                  |
| <b>TS( IM1:bipy =&gt; IM2:bipy )</b>     | 27.16      | 26.26      | 26.73      | 26.45                    | 25.55                    | 26.02                    | 29.25                  | 28.11                  |

### Identifiers and Visual Representations of Optimized Structures

- Visual representations of the compounds are given after this note. The labels contain the **identifiers**, text formulas, and numbers of valence electrons of iridium in brackets. The cartesian coordinates of atoms are provided as a supplementary material.
- The quotation mark (') after an identifier implies that the associated computations were performed using a diffuse basis set (ma-def2-TZVPP) instead of def2-TZVPP (see the “computational methods” Section of this document).
- The compounds bearing –Br and/or –P(OMe)<sub>3</sub> fragments are abbreviated without any transcript after the colon. On the contrary, the variation of the halogen (:Cl, :I) and/or nucleophile (:P, :bipy) is given after the colon.
- In this way, the reactants and products are abbreviated with the following identifiers: [CpIr(COD)Br]<sup>+</sup> (**1**), [CpIr(COD)Cl]<sup>+</sup> (**1:Cl**), [CpIr(COD)I]<sup>+</sup> (**1:I**), [(COD)Ir(P(OMe)<sub>3</sub>)<sub>3</sub>]<sup>+</sup> (**2**), [(COD)Ir(PMe<sub>3</sub>)<sub>3</sub>]<sup>+</sup> (**2:P**), [Cp\*Ir(COD)Br]<sup>+</sup> (**3**), [Cp\*Ir(P(OMe)<sub>3</sub>)<sub>2</sub>Br]<sup>+</sup> (**4**), P(OMe)<sub>3</sub> (**PO**), [C<sub>5</sub>H<sub>5</sub>P(OMe)<sub>3</sub>]<sup>+</sup> (**diene**), PMe<sub>3</sub> (**P**), [C<sub>5</sub>H<sub>5</sub>PMe<sub>3</sub>]<sup>+</sup> (**diene:P**), COD (**COD**), bipy (**bipy**), Cl<sup>–</sup> (**Cl'**), Br<sup>–</sup> (**Br'**), and I<sup>–</sup> (**I'**).
- The intermediates are abbreviated following the same principles. For instance, the intermediates **IM1–15**, **IM1'**, **IMs'**, **IM6'**, and **IM7'** have –Br and/or –P(OMe)<sub>3</sub> fragments in the structure. On the contrary, the intermediates **IM1:Cl**, **IM1:I**, and **IM6:Cl'**, **IM6:I'** are the full analogues of **IM1** and **IM6'**, respectively, but with a halogen other than bromine. Similarly, the intermediates **IM1:bipy** and **IM1:P** have the attached nucleophile other than the P(OMe)<sub>3</sub>.
- The transition states are abbreviated with **TS\_<reactant>\_<product>** identifiers, where the <reactant> and <product> indicate the initial and final intermediates, respectively, which are connected via this transition state. For instance, the transition state for the addition of **PO** to **1** with the formation of **IM1** is abbreviated as **TS\_1\_IM1**. For the addition of **bipy** to **1** and the addition of **PO** to **1:Cl**, the corresponding identifiers are **TS\_1\_IM1:bipy** and **TS\_1\_IM1:Cl**, respectively.

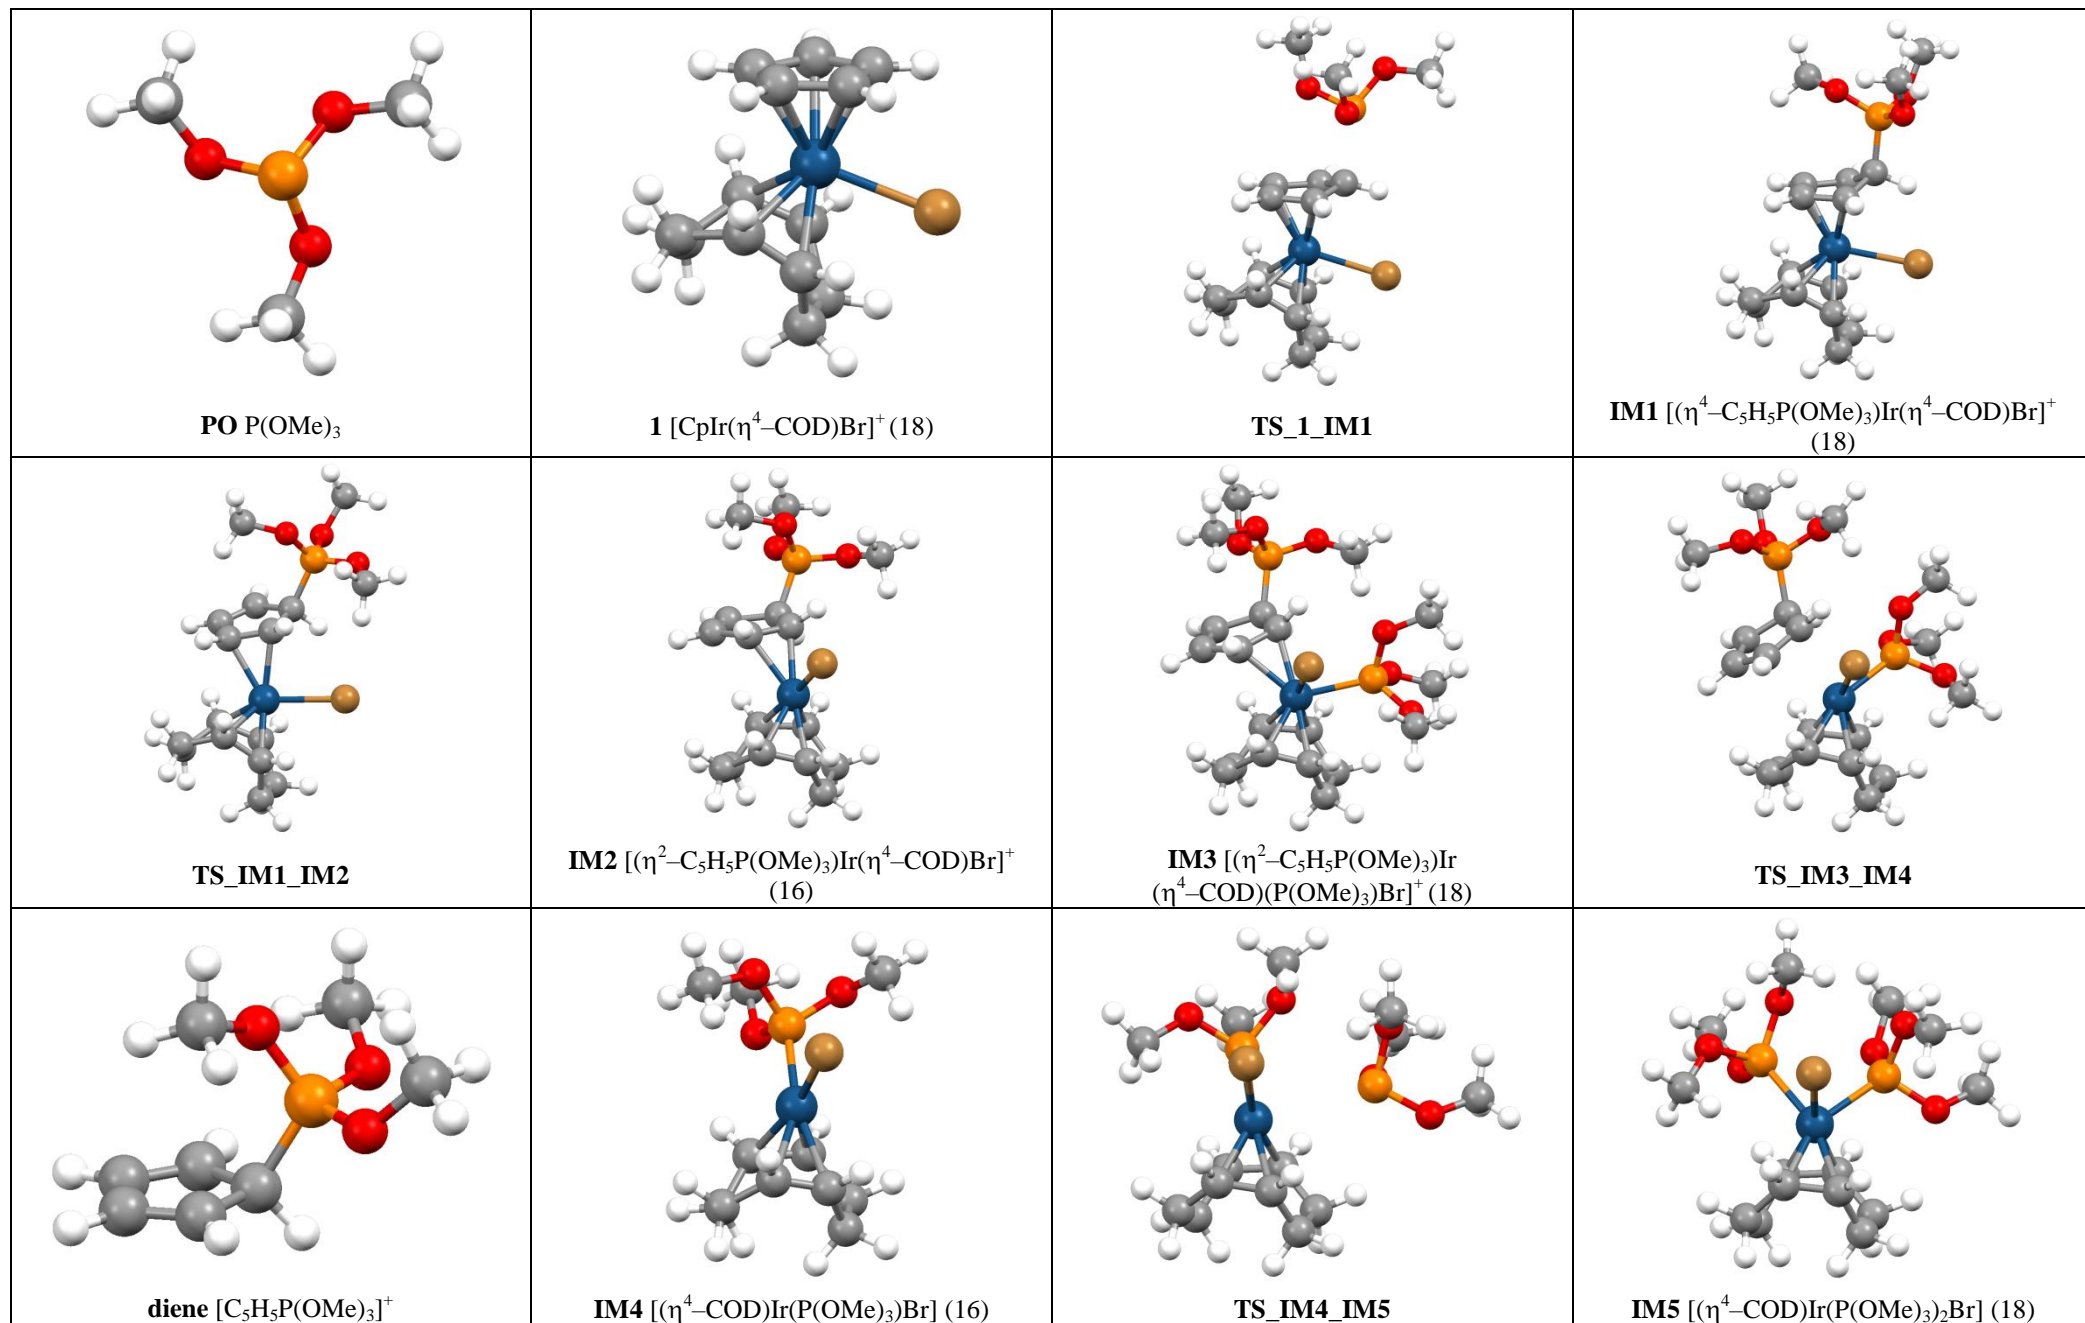

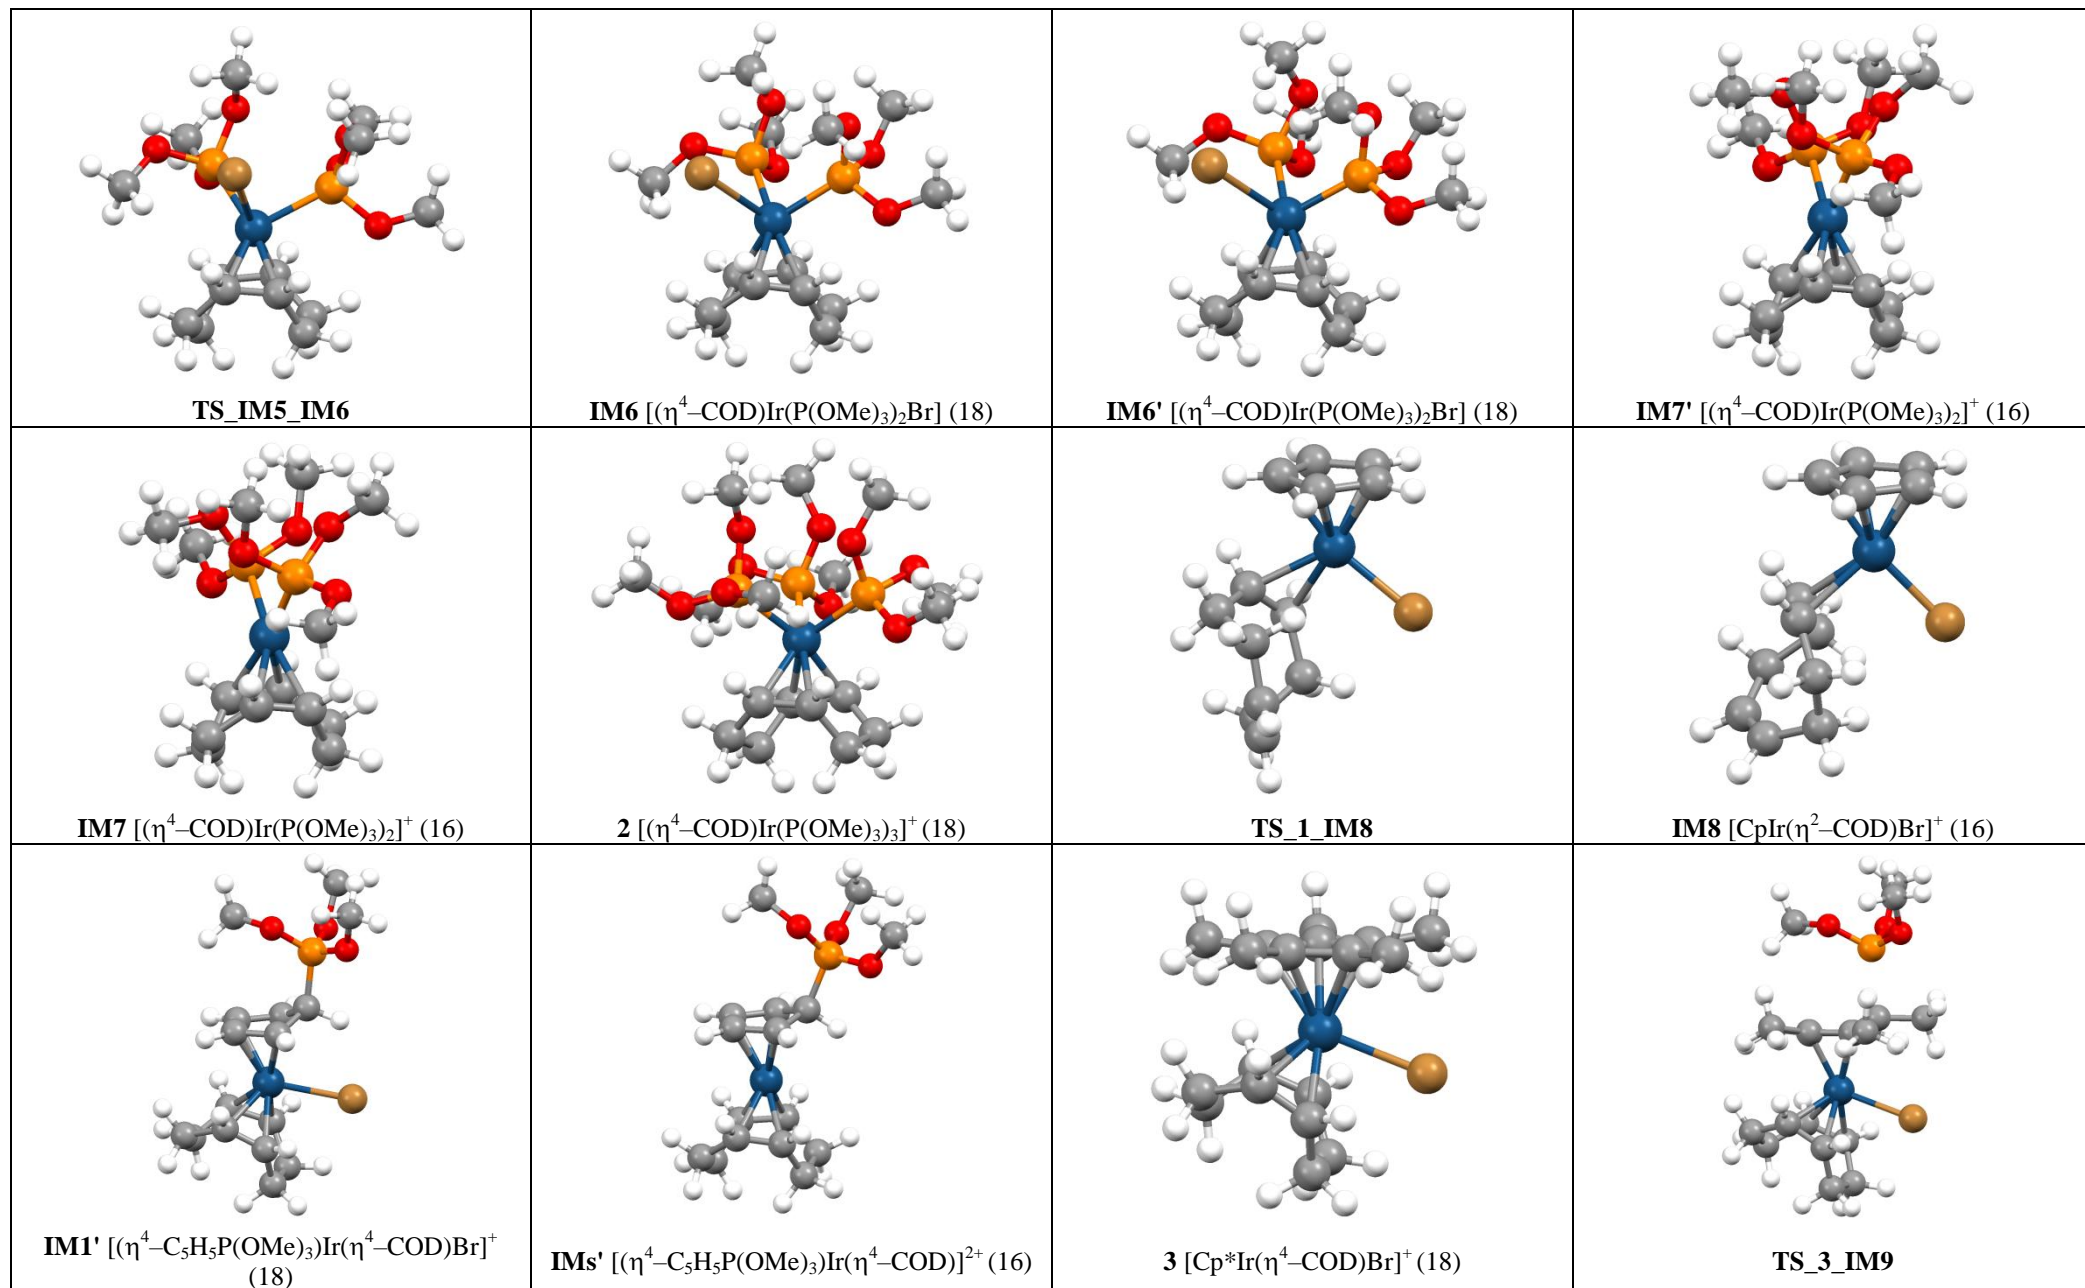

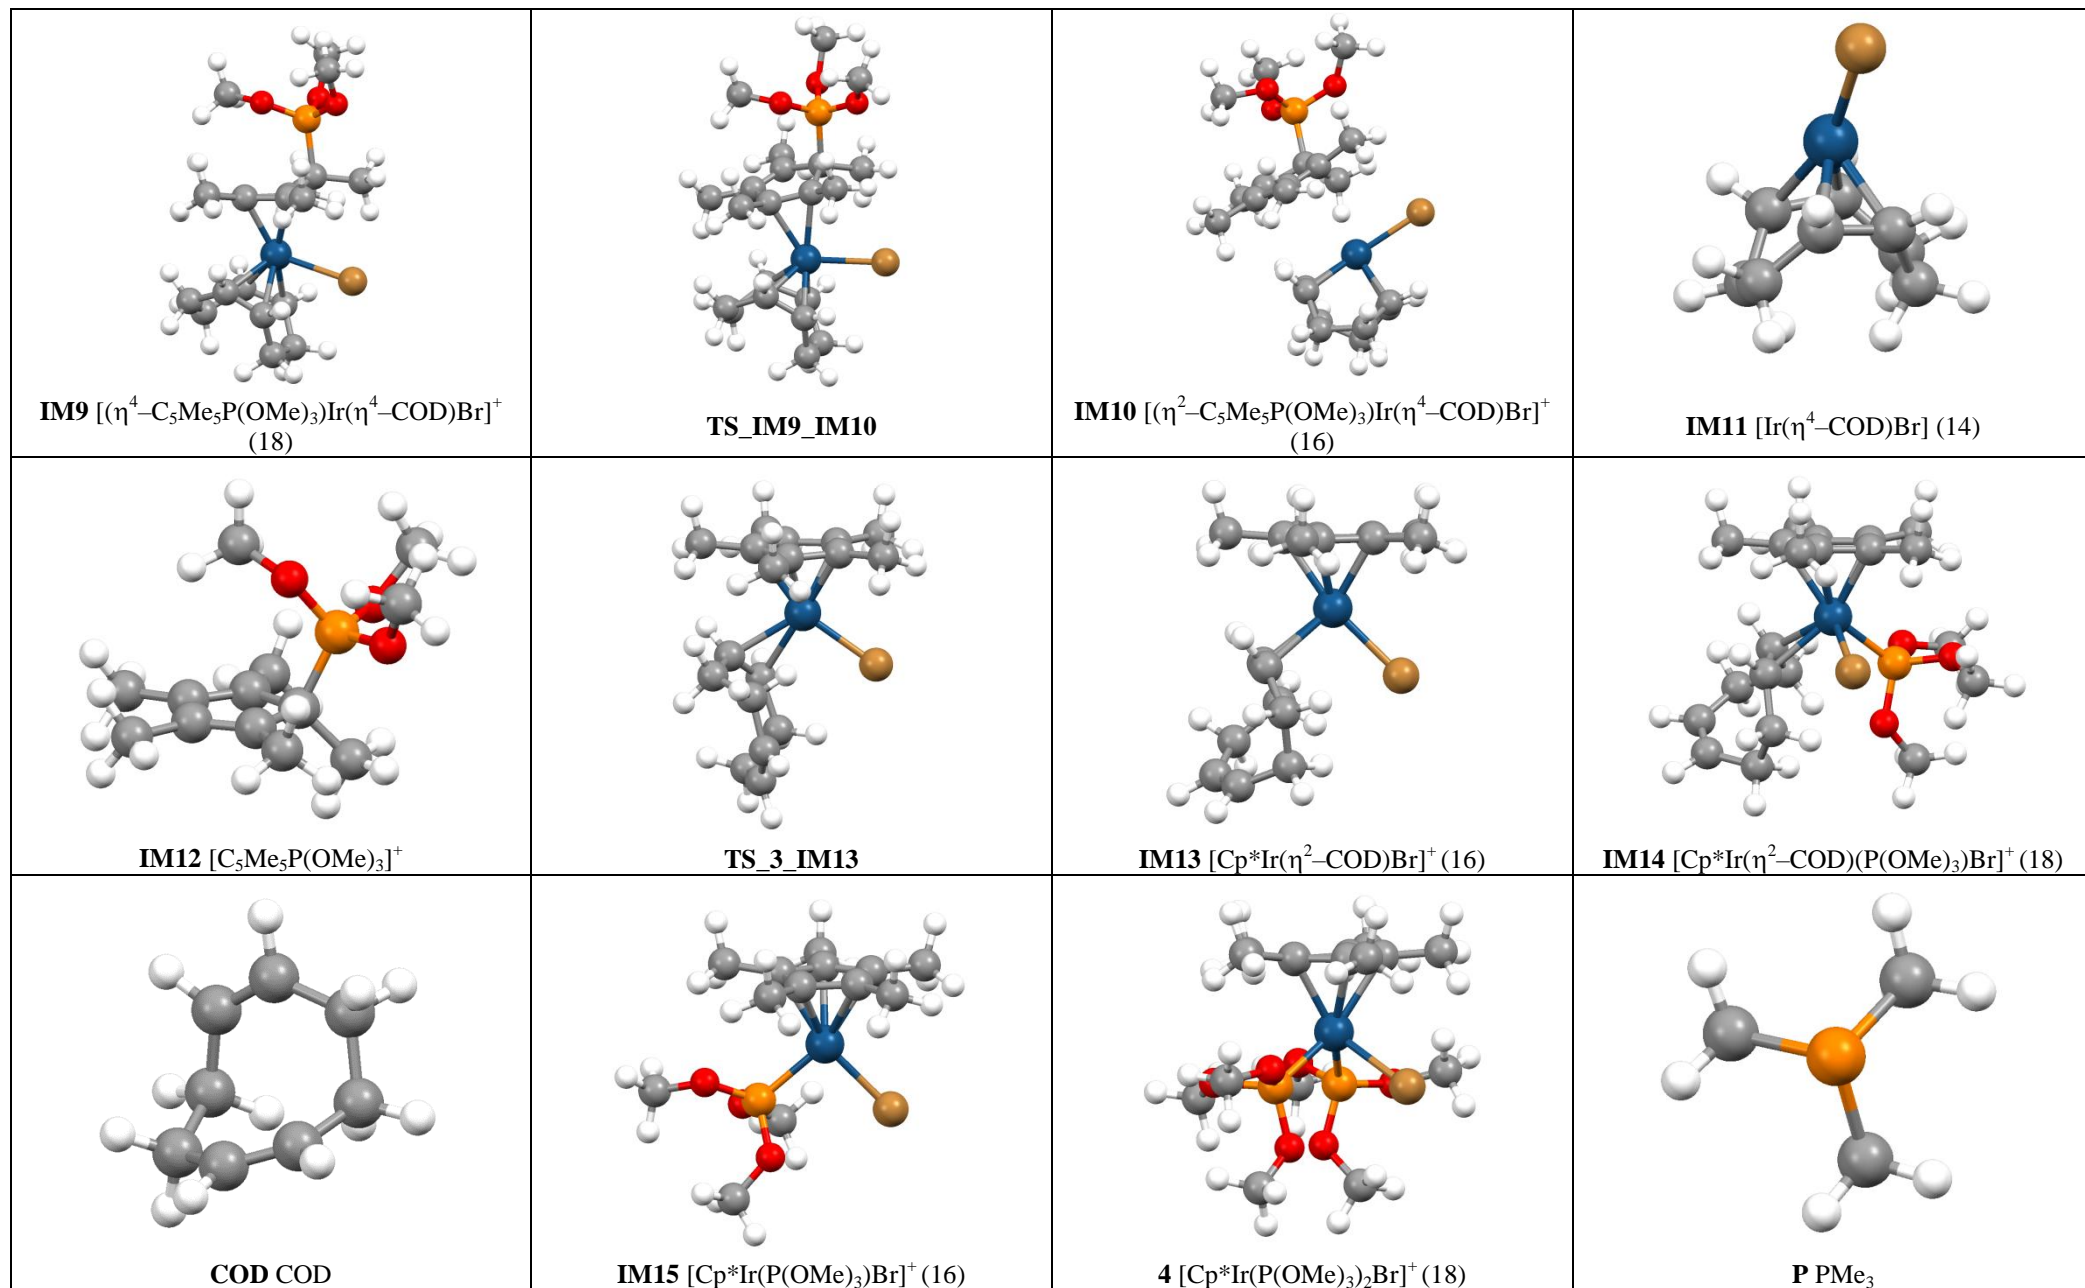

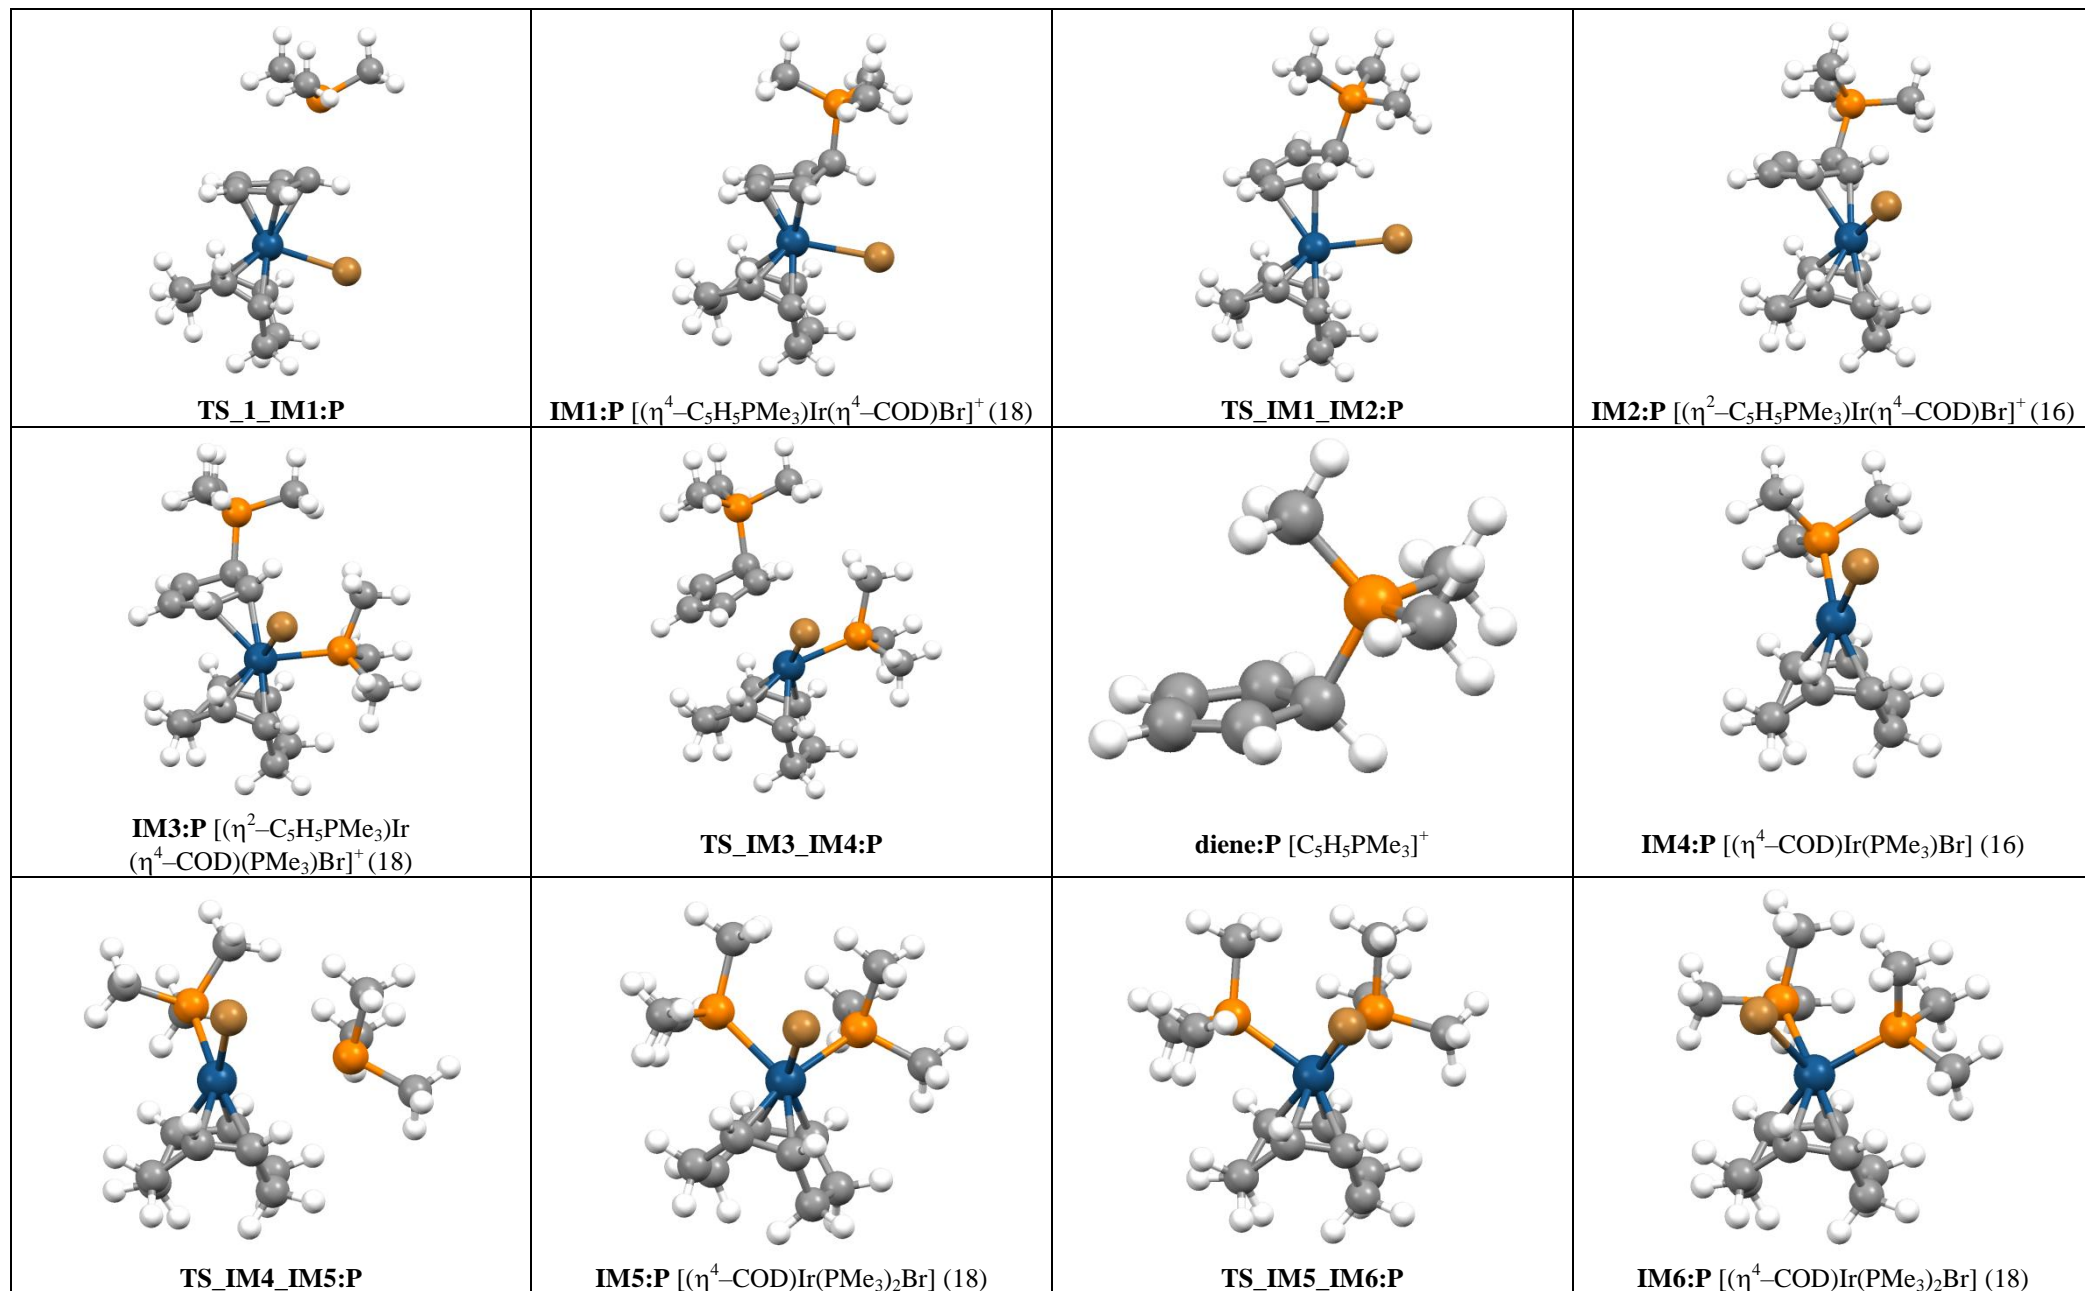



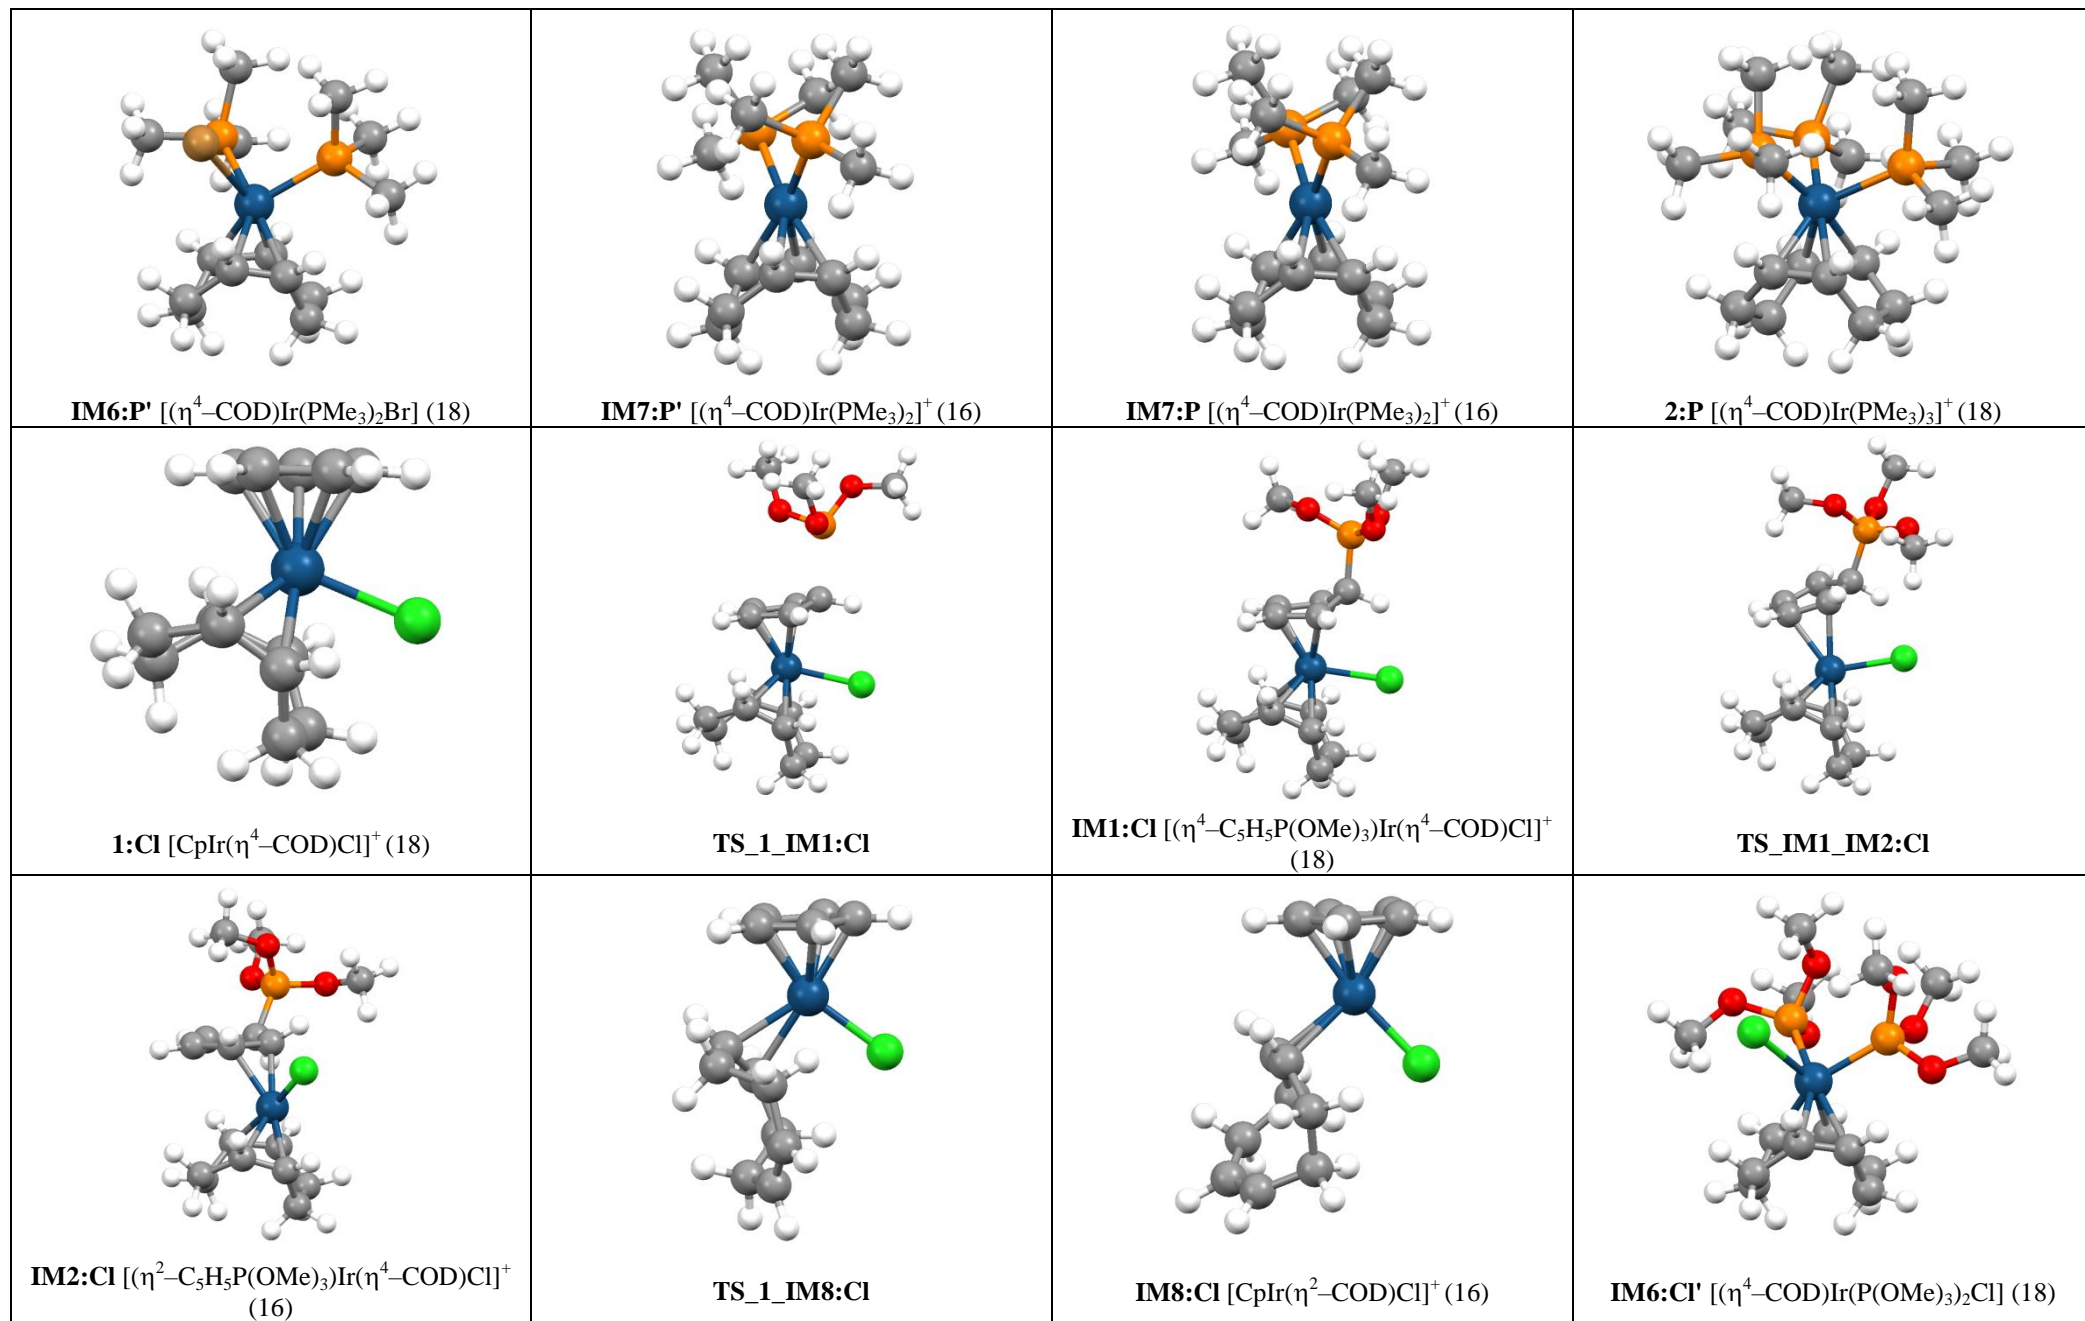

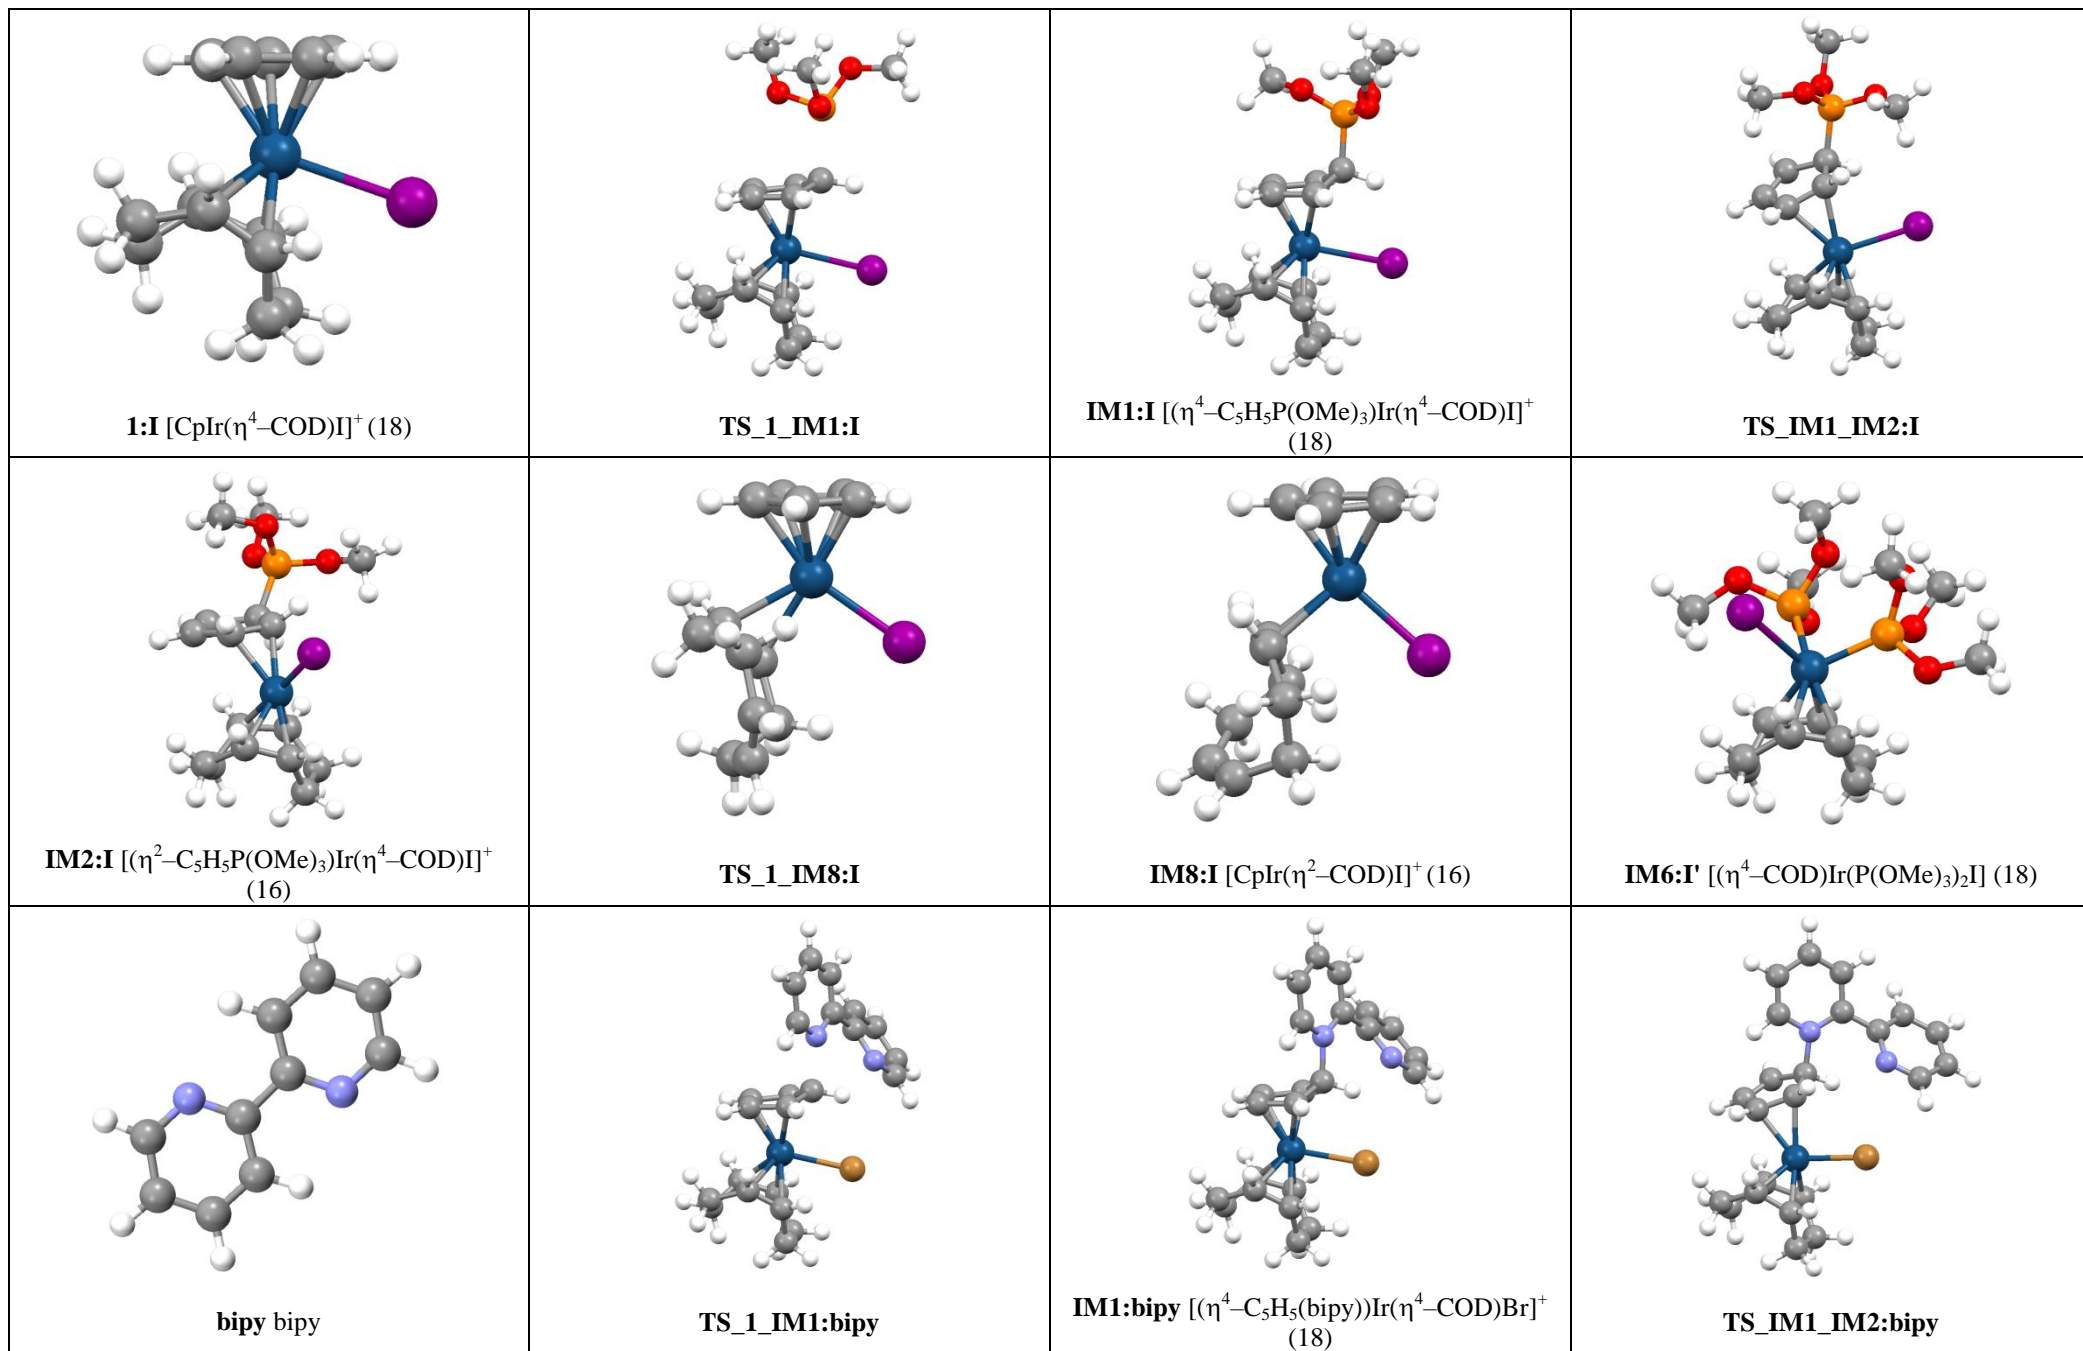

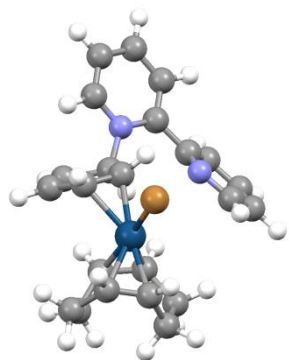

**IM2:bipy**  $[(\eta^2\text{-C}_5\text{H}_5(\text{bipy}))\text{Ir}(\eta^4\text{-COD})\text{Br}]^+$   
(16)

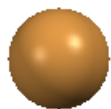

**Br'** Br<sup>-</sup>

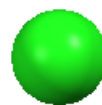

**Cl'** Cl<sup>-</sup>

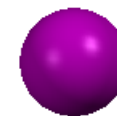

**I'** I<sup>-</sup>

## References

1. Y. Zhao and D. G. Truhlar, *J. Chem. Phys.*, 2006, **125**, 194101.
2. Gaussian 09, Revision E.01, Gaussian, Inc., Wallingford CT, 2013.
3. F. Weigend and R. Ahlrichs, *Phys. Chem. Chem. Phys.*, 2005, **7**, 3297-3305.
4. F. Weigend, *Phys. Chem. Chem. Phys.*, 2006, **8**, 1057-1065.
5. S. Grimme, J. Antony, S. Ehrlich and H. Krieg, *J. Chem. Phys.*, 2010, **132**, 154104.
6. S. Grimme, *Chem. - Eur. J.*, 2012, **18**, 9955-9964.
7. G. Luchini, J. V. Alegre-Requena, Y. Guan, I. Funes-Ardoiz, R. S. Paton. GoodVibes 3.0.1 (2019) <http://doi.org/10.5281/zenodo.595246>
8. A. V. Marenich, C. J. Cramer and D. G. Truhlar, *J. Phys. Chem. B*, 2009, **113**, 6378-6396.
9. A. A. Chamkin and E. S. Serkova, *J. Comput. Chem.*, 2020, **41**, 2388-2397.
10. C. Riplinger, P. Pinski, U. Becker, E. F. Valeev and F. Neese, *J. Chem. Phys.*, 2016, **144**, 024109.
11. F. Neese, *WIREs Comput. Mol. Sci.*, 2017, **8**, e1327.
12. A. Hellweg, C. Hättig, S. Höfener and W. Klopper, *Theor. Chem. Acc.*, 2007, **117**, 587-597.
13. J. Zheng, X. Xu and D. G. Truhlar, *Theor. Chem. Acc.*, 2010, **128**, 295-305.
14. G. L. Stoychev, A. A. Auer and F. Neese, *J. Chem. Theory Comput.*, 2017, **13**, 554-562.
15. M. Buhl, C. Reimann, D. A. Pantazis, T. Bredow and F. Neese, *J. Chem. Theory Comput.*, 2008, **4**, 1449-1459.
16. S. Grimme, A. Hansen, S. Ehlert and J. M. Mewes, *J. Chem. Phys.*, 2021, **154**, 064103.
17. K. Fukui, *Acc. Chem. Res.*, 1981, **14**, 363-368.
18. D. A. Loginov, A. M. Miloserdov, Z. A. Starikova, P. V. Petrovskii and A. R. Kudinov, *Mendeleev Commun.*, 2012, **22**, 192-193.
19. A. P. Moskovets, D. L. Usanov, O. I. Afanasyev, V. A. Fastovskiy, A. P. Molotkov, K. M. Muratov, G. L. Denisov, S. S. Zlotskii, A. F. Smol'yakov, D. A. Loginov and D. Chusov, *Org. Biomol. Chem.*, 2017, **15**, 6384-6387.
20. V. P. Datsenko, Y. V. Nelyubina, A. F. Smol'yakov and D. A. Loginov, *J. Organomet. Chem.*, 2018, **874**, 7-12.

## Cartesian Coordinates of Optimized Structures

Multiple XYZ-file format is used.

16

structure of PO

|   |              |              |              |
|---|--------------|--------------|--------------|
| P | -1.503022000 | -0.506683000 | -0.325613000 |
| O | -0.857889000 | 0.517981000  | 0.764769000  |
| O | -0.563335000 | -1.794613000 | 0.010860000  |
| O | -0.678713000 | 0.022499000  | -1.627868000 |
| C | -0.810483000 | -2.993409000 | -0.704606000 |
| H | -0.315286000 | -2.971572000 | -1.675888000 |
| H | -0.409729000 | -3.817439000 | -0.120700000 |
| H | -1.879165000 | -3.160185000 | -0.860785000 |
| C | -1.184498000 | 1.158375000  | -2.309018000 |
| H | -0.866788000 | 2.077199000  | -1.815148000 |
| H | -0.786951000 | 1.143610000  | -3.320102000 |
| H | -2.276074000 | 1.148488000  | -2.360219000 |
| C | -1.340088000 | 0.449628000  | 2.096308000  |
| H | -1.127064000 | 1.400971000  | 2.576012000  |
| H | -2.418007000 | 0.272795000  | 2.129203000  |
| H | -0.839010000 | -0.346809000 | 2.647398000  |

32

structure of 1

|    |             |              |             |
|----|-------------|--------------|-------------|
| Ir | 1.140982000 | 12.505657000 | 4.348966000 |
| C  | 1.444450000 | 10.859588000 | 7.044832000 |
| H  | 2.377542000 | 10.319084000 | 7.192032000 |
| H  | 0.723420000 | 10.396087000 | 7.714415000 |
| C  | 1.606965000 | 12.330652000 | 7.403054000 |
| H  | 0.643982000 | 12.746727000 | 7.700589000 |
| H  | 2.257582000 | 12.460983000 | 8.272253000 |
| C  | 2.148432000 | 13.144720000 | 6.267145000 |
| H  | 1.969608000 | 14.211118000 | 6.342701000 |
| C  | 3.152535000 | 12.762041000 | 5.378571000 |
| H  | 3.613239000 | 13.566158000 | 4.822034000 |
| C  | 3.955001000 | 11.486316000 | 5.455667000 |
| H  | 4.126303000 | 11.251001000 | 6.505857000 |
| H  | 4.935445000 | 11.685516000 | 5.031569000 |
| C  | 3.335346000 | 10.287862000 | 4.722099000 |
| H  | 3.785592000 | 10.190712000 | 3.739519000 |
| H  | 3.560682000 | 9.360405000  | 5.254835000 |
| C  | 1.850357000 | 10.385341000 | 4.555694000 |
| H  | 1.438682000 | 9.874748000  | 3.693643000 |

|    |              |              |             |
|----|--------------|--------------|-------------|
| C  | 0.984383000  | 10.668296000 | 5.618297000 |
| H  | -0.048797000 | 10.366662000 | 5.494429000 |
| C  | -0.298136000 | 14.166666000 | 4.810007000 |
| C  | -0.950288000 | 12.905453000 | 4.910664000 |
| C  | 0.196769000  | 14.316021000 | 3.492637000 |
| H  | -0.156788000 | 14.862510000 | 5.620547000 |
| C  | -0.923255000 | 12.289399000 | 3.611725000 |
| H  | -1.431450000 | 12.511721000 | 5.790512000 |
| C  | -0.223920000 | 13.157899000 | 2.746496000 |
| H  | 0.748462000  | 15.153364000 | 3.101386000 |
| H  | -1.358541000 | 11.340848000 | 3.345033000 |
| H  | 0.015396000  | 12.963046000 | 1.714772000 |
| Br | 2.800317000  | 12.457430000 | 2.368191000 |

48

structure of TS\_1\_IM1

|    |              |              |             |
|----|--------------|--------------|-------------|
| Ir | 1.343200000  | 12.541641000 | 4.551125000 |
| C  | 1.609721000  | 11.492838000 | 7.522200000 |
| H  | 2.156164000  | 10.561783000 | 7.663221000 |
| H  | 1.003279000  | 11.617329000 | 8.416871000 |
| C  | 2.568252000  | 12.667661000 | 7.382610000 |
| H  | 2.075022000  | 13.581921000 | 7.715255000 |
| H  | 3.437441000  | 12.552188000 | 8.036455000 |
| C  | 3.033211000  | 12.865447000 | 5.968658000 |
| H  | 3.417882000  | 13.856256000 | 5.751120000 |
| C  | 3.407347000  | 11.856536000 | 5.075205000 |
| H  | 4.012275000  | 12.173077000 | 4.236620000 |
| C  | 3.489319000  | 10.384724000 | 5.411137000 |
| H  | 3.841942000  | 10.281332000 | 6.437484000 |
| H  | 4.262014000  | 9.942652000  | 4.787338000 |
| C  | 2.181804000  | 9.608128000  | 5.202397000 |
| H  | 2.203263000  | 9.119305000  | 4.233208000 |
| H  | 2.090551000  | 8.811524000  | 5.945827000 |
| C  | 0.953260000  | 10.468065000 | 5.265398000 |
| H  | 0.106038000  | 10.113648000 | 4.691192000 |
| C  | 0.699336000  | 11.352805000 | 6.321653000 |
| H  | -0.335430000 | 11.627891000 | 6.484543000 |
| C  | 1.392346000  | 14.507949000 | 3.573561000 |
| C  | 0.894959000  | 14.645880000 | 4.910400000 |
| C  | 0.337729000  | 13.918997000 | 2.765926000 |
| H  | 2.271935000  | 14.989601000 | 3.181113000 |
| C  | -0.307286000 | 13.895825000 | 5.004917000 |
| H  | 1.353994000  | 15.205452000 | 5.708234000 |
| C  | -0.552644000 | 13.297968000 | 3.730371000 |

|    |              |              |              |
|----|--------------|--------------|--------------|
| H  | -0.915940000 | 13.788403000 | 5.886981000  |
| H  | -1.406701000 | 12.690056000 | 3.483036000  |
| Br | 1.992581000  | 11.248825000 | 2.370123000  |
| H  | 0.556372000  | 13.448768000 | 1.822114000  |
| P  | -0.801839000 | 15.814184000 | 1.859745000  |
| O  | -1.709034000 | 16.253537000 | 3.084608000  |
| O  | -1.809592000 | 16.124921000 | 0.645187000  |
| O  | 0.400886000  | 16.848638000 | 1.700415000  |
| C  | -2.789178000 | 17.203745000 | 3.029339000  |
| H  | -3.164075000 | 17.297720000 | 4.042157000  |
| H  | -2.441546000 | 18.172281000 | 2.678401000  |
| H  | -3.575581000 | 16.841266000 | 2.374255000  |
| C  | -1.402558000 | 15.883146000 | -0.709670000 |
| H  | -1.225744000 | 14.822706000 | -0.877754000 |
| H  | -2.218811000 | 16.214221000 | -1.341335000 |
| H  | -0.503031000 | 16.446085000 | -0.953483000 |
| C  | 0.222191000  | 18.262387000 | 1.511992000  |
| H  | 0.051410000  | 18.742485000 | 2.473111000  |
| H  | 1.138532000  | 18.644297000 | 1.075563000  |
| H  | -0.611950000 | 18.467070000 | 0.842867000  |

48

structure of IM1

|    |              |              |             |
|----|--------------|--------------|-------------|
| Ir | 1.481636000  | 12.826946000 | 4.552645000 |
| C  | 0.792676000  | 10.379353000 | 6.426870000 |
| H  | 1.604661000  | 9.685718000  | 6.638775000 |
| H  | -0.123295000 | 9.831738000  | 6.640152000 |
| C  | 0.879888000  | 11.606199000 | 7.324860000 |
| H  | -0.118100000 | 12.024518000 | 7.465368000 |
| H  | 1.228360000  | 11.342444000 | 8.327952000 |
| C  | 1.764982000  | 12.675915000 | 6.749156000 |
| H  | 1.597183000  | 13.669117000 | 7.153353000 |
| C  | 3.003063000  | 12.469341000 | 6.125793000 |
| H  | 3.652077000  | 13.333360000 | 6.074578000 |
| C  | 3.700014000  | 11.131350000 | 6.004077000 |
| H  | 3.485876000  | 10.538741000 | 6.893533000 |
| H  | 4.772832000  | 11.308173000 | 6.020604000 |
| C  | 3.343013000  | 10.358206000 | 4.729568000 |
| H  | 4.081459000  | 10.572802000 | 3.961629000 |
| H  | 3.389669000  | 9.280277000  | 4.907918000 |
| C  | 1.990496000  | 10.711386000 | 4.177215000 |
| H  | 1.873309000  | 10.552902000 | 3.111663000 |
| C  | 0.823273000  | 10.744554000 | 4.957283000 |
| H  | -0.113119000 | 10.615955000 | 4.427544000 |

|    |              |              |              |
|----|--------------|--------------|--------------|
| C  | 0.976278000  | 14.948192000 | 4.440042000  |
| C  | -0.117454000 | 14.213044000 | 5.006302000  |
| C  | 0.857422000  | 14.883947000 | 2.929787000  |
| H  | 1.496567000  | 15.742103000 | 4.953803000  |
| C  | -0.559490000 | 13.292700000 | 4.015337000  |
| H  | -0.508508000 | 14.302034000 | 6.006726000  |
| C  | 0.263461000  | 13.487857000 | 2.860620000  |
| H  | -1.341777000 | 12.560372000 | 4.134282000  |
| H  | 0.147733000  | 12.942795000 | 1.936112000  |
| Br | 3.634319000  | 13.288492000 | 3.125086000  |
| H  | 1.834639000  | 14.933732000 | 2.438122000  |
| P  | -0.129808000 | 16.183929000 | 2.194080000  |
| O  | 0.581733000  | 17.533629000 | 2.469073000  |
| O  | -1.572199000 | 16.391408000 | 2.771233000  |
| O  | -0.215535000 | 15.821982000 | 0.678851000  |
| C  | -0.043207000 | 18.832081000 | 2.596101000  |
| H  | 0.761421000  | 19.527405000 | 2.800099000  |
| H  | -0.543497000 | 19.106613000 | 1.671801000  |
| H  | -0.751424000 | 18.821371000 | 3.418214000  |
| C  | -2.679647000 | 15.498204000 | 2.525516000  |
| H  | -2.853859000 | 14.907668000 | 3.419104000  |
| H  | -3.546149000 | 16.116359000 | 2.316633000  |
| H  | -2.478645000 | 14.843767000 | 1.680034000  |
| C  | -0.794349000 | 16.680669000 | -0.327973000 |
| H  | -0.112653000 | 17.499089000 | -0.542470000 |
| H  | -0.922726000 | 16.070547000 | -1.213591000 |
| H  | -1.759282000 | 17.064129000 | -0.001792000 |

48

structure of TS\_IM1\_IM2

|    |              |              |             |
|----|--------------|--------------|-------------|
| Ir | 1.000004000  | -0.606047000 | 0.951724000 |
| C  | 0.276263000  | -3.340258000 | 2.277784000 |
| H  | 1.072493000  | -4.063475000 | 2.449831000 |
| H  | -0.644307000 | -3.919558000 | 2.262033000 |
| C  | 0.219709000  | -2.294080000 | 3.384268000 |
| H  | -0.815768000 | -2.001472000 | 3.558185000 |
| H  | 0.579902000  | -2.683844000 | 4.340652000 |
| C  | 1.001167000  | -1.068483000 | 2.999425000 |
| H  | 0.716303000  | -0.167129000 | 3.537916000 |
| C  | 2.352669000  | -1.111855000 | 2.501748000 |
| H  | 2.943689000  | -0.221935000 | 2.682109000 |
| C  | 3.158982000  | -2.387300000 | 2.356481000 |
| H  | 2.804479000  | -3.142095000 | 3.057274000 |
| H  | 4.193566000  | -2.194308000 | 2.629398000 |



|    |              |              |              |
|----|--------------|--------------|--------------|
| C  | 3.071684000  | -2.864504000 | 0.915750000  |
| H  | 3.860907000  | -2.397504000 | 0.328781000  |
| H  | 3.214522000  | -3.944422000 | 0.813870000  |
| C  | 1.753036000  | -2.466255000 | 0.316180000  |
| H  | 1.751339000  | -2.421469000 | -0.770966000 |
| C  | 0.470561000  | -2.671948000 | 0.930061000  |
| H  | -0.342135000 | -2.824500000 | 0.230360000  |
| C  | -0.386028000 | 0.867637000  | 0.066487000  |
| C  | -1.187658000 | -0.144923000 | 0.649162000  |
| C  | -0.505370000 | 0.762044000  | -1.444457000 |
| H  | -0.155938000 | 1.808851000  | 0.547145000  |
| C  | -1.784988000 | -0.911249000 | -0.446643000 |
| H  | -1.639474000 | -0.086983000 | 1.629594000  |
| C  | -1.423759000 | -0.416535000 | -1.638007000 |
| H  | -2.418888000 | -1.774078000 | -0.305299000 |
| H  | -1.669756000 | -0.811785000 | -2.610321000 |
| Br | 2.776566000  | 0.899403000  | -0.144988000 |
| H  | 0.468495000  | 0.620101000  | -1.933167000 |
| P  | -1.107574000 | 2.276730000  | -2.167414000 |
| O  | -0.025335000 | 3.372726000  | -2.292622000 |
| O  | -2.256806000 | 2.943249000  | -1.349467000 |
| O  | -1.543970000 | 1.916359000  | -3.610681000 |
| C  | 0.651638000  | 4.015383000  | -1.177525000 |
| H  | 1.196071000  | 4.847225000  | -1.606492000 |
| H  | -0.081047000 | 4.379463000  | -0.462361000 |
| H  | 1.342021000  | 3.306855000  | -0.722091000 |
| C  | -3.479767000 | 2.260703000  | -0.985284000 |
| H  | -3.287059000 | 1.591564000  | -0.151820000 |
| H  | -4.179324000 | 3.034193000  | -0.692026000 |
| H  | -3.874410000 | 1.703831000  | -1.831975000 |
| C  | -1.942978000 | 2.913652000  | -4.586262000 |
| H  | -1.087573000 | 3.527272000  | -4.850129000 |
| H  | -2.291557000 | 2.361292000  | -5.449524000 |
| H  | -2.744596000 | 3.529462000  | -4.186696000 |

48

structure of IM2

|    |             |              |             |
|----|-------------|--------------|-------------|
| Ir | 0.172792000 | 12.941365000 | 5.349522000 |
| C  | 1.457332000 | 10.349278000 | 6.409941000 |
| H  | 2.499269000 | 10.139636000 | 6.177478000 |
| H  | 1.028475000 | 9.395586000  | 6.709577000 |
| C  | 1.338848000 | 11.340122000 | 7.569732000 |
| H  | 0.411086000 | 11.151166000 | 8.110984000 |
| H  | 2.138924000 | 11.189711000 | 8.300796000 |

|    |              |              |             |
|----|--------------|--------------|-------------|
| C  | 1.334854000  | 12.776998000 | 7.118793000 |
| H  | 0.960325000  | 13.468301000 | 7.870345000 |
| C  | 2.172201000  | 13.318863000 | 6.118247000 |
| H  | 2.346993000  | 14.383779000 | 6.189551000 |
| C  | 3.262952000  | 12.557262000 | 5.394216000 |
| H  | 3.665466000  | 11.779108000 | 6.039871000 |
| H  | 4.095756000  | 13.231031000 | 5.200638000 |
| C  | 2.771010000  | 11.972656000 | 4.069684000 |
| H  | 2.870577000  | 12.719624000 | 3.281597000 |
| H  | 3.396317000  | 11.131554000 | 3.755776000 |
| C  | 1.337574000  | 11.543526000 | 4.122127000 |
| H  | 0.823667000  | 11.515500000 | 3.167096000 |
| C  | 0.730702000  | 10.844545000 | 5.179855000 |
| H  | -0.188111000 | 10.325895000 | 4.928526000 |
| C  | -0.631403000 | 14.922902000 | 5.688180000 |
| C  | 0.041499000  | 14.967405000 | 4.431496000 |
| H  | -1.707853000 | 14.805136000 | 5.733881000 |
| H  | -0.430169000 | 14.736216000 | 3.487184000 |
| Br | -1.940931000 | 12.456900000 | 4.117378000 |
| C  | 1.159813000  | 15.887713000 | 4.527470000 |
| C  | 1.188880000  | 16.472081000 | 5.734103000 |
| C  | 0.070382000  | 15.934741000 | 6.587910000 |
| H  | 1.931193000  | 17.160224000 | 6.109151000 |
| P  | -1.090472000 | 17.190285000 | 7.086614000 |
| O  | -0.248360000 | 18.292651000 | 7.778870000 |
| O  | -1.960635000 | 17.741905000 | 5.921379000 |
| O  | -2.118075000 | 16.688372000 | 8.131573000 |
| C  | -0.838851000 | 19.453213000 | 8.419719000 |
| C  | -1.452597000 | 18.315174000 | 4.692453000 |
| C  | -3.273022000 | 15.855064000 | 7.854923000 |
| H  | -0.009537000 | 20.081870000 | 8.717668000 |
| H  | -1.406609000 | 19.139624000 | 9.289999000 |
| H  | -1.477742000 | 19.983586000 | 7.718438000 |
| H  | -1.252221000 | 17.517438000 | 3.984545000 |
| H  | -0.549032000 | 18.890019000 | 4.880685000 |
| H  | -2.235814000 | 18.963143000 | 4.317181000 |
| H  | -3.729976000 | 16.143410000 | 6.912970000 |
| H  | -3.963674000 | 16.021236000 | 8.672408000 |
| H  | -2.966387000 | 14.813528000 | 7.831672000 |
| H  | 0.450524000  | 15.528444000 | 7.533316000 |
| H  | 1.875353000  | 16.060190000 | 3.736987000 |

64

structure of IM3

|    |              |              |             |
|----|--------------|--------------|-------------|
| Ir | 0.148568000  | 13.055659000 | 5.614549000 |
| C  | 1.795534000  | 10.505449000 | 6.385593000 |
| H  | 2.788603000  | 10.355465000 | 5.961873000 |
| H  | 1.470740000  | 9.518731000  | 6.711477000 |
| C  | 1.859648000  | 11.435838000 | 7.597583000 |
| H  | 1.108440000  | 11.129892000 | 8.327071000 |
| H  | 2.820146000  | 11.348506000 | 8.114844000 |
| C  | 1.619004000  | 12.881034000 | 7.251859000 |
| H  | 1.293176000  | 13.493100000 | 8.083367000 |
| C  | 2.218480000  | 13.546435000 | 6.172638000 |
| H  | 2.282831000  | 14.620622000 | 6.270665000 |
| C  | 3.270112000  | 12.925896000 | 5.276158000 |
| H  | 3.828760000  | 12.182894000 | 5.845262000 |
| H  | 3.995240000  | 13.693262000 | 5.008840000 |
| C  | 2.674768000  | 12.314126000 | 4.013040000 |
| H  | 2.651545000  | 13.064199000 | 3.222760000 |
| H  | 3.308322000  | 11.506376000 | 3.633827000 |
| C  | 1.271433000  | 11.817239000 | 4.219944000 |
| H  | 0.681014000  | 11.729821000 | 3.315257000 |
| C  | 0.854402000  | 11.008558000 | 5.307968000 |
| H  | -0.001702000 | 10.378069000 | 5.100993000 |
| C  | -0.580987000 | 15.089051000 | 5.662575000 |
| C  | 0.129711000  | 14.922599000 | 4.410341000 |
| H  | -1.665547000 | 15.072885000 | 5.677986000 |
| H  | -0.369670000 | 14.644468000 | 3.492849000 |
| Br | -1.898640000 | 12.538411000 | 4.116882000 |
| C  | 1.239246000  | 15.862471000 | 4.392646000 |
| C  | 1.272325000  | 16.615959000 | 5.499736000 |
| C  | 0.144430000  | 16.210388000 | 6.421984000 |
| H  | 2.021501000  | 17.340174000 | 5.779603000 |
| P  | -0.958267000 | 17.570369000 | 6.742356000 |
| O  | -0.078229000 | 18.807715000 | 7.064439000 |
| O  | -1.957709000 | 17.853712000 | 5.582441000 |
| O  | -1.868906000 | 17.357907000 | 7.985554000 |
| C  | -0.637513000 | 20.086598000 | 7.451867000 |
| C  | -1.576422000 | 18.028739000 | 4.195405000 |
| C  | -2.741552000 | 16.213669000 | 8.125996000 |
| H  | 0.191677000  | 20.782553000 | 7.467968000 |
| H  | -1.082322000 | 20.007226000 | 8.438995000 |
| H  | -1.380480000 | 20.407647000 | 6.726232000 |
| H  | -2.425019000 | 18.496381000 | 3.710788000 |
| H  | -1.376907000 | 17.057055000 | 3.753419000 |
| H  | -0.700362000 | 18.667997000 | 4.117778000 |

|   |              |              |              |
|---|--------------|--------------|--------------|
| H | -3.400119000 | 16.129717000 | 7.264562000  |
| H | -3.322789000 | 16.390785000 | 9.023013000  |
| H | -2.147286000 | 15.308132000 | 8.233196000  |
| H | 0.513632000  | 15.918320000 | 7.413414000  |
| H | 1.961603000  | 15.924795000 | 3.590714000  |
| P | -1.309249000 | 12.435365000 | 7.393185000  |
| O | -0.872706000 | 12.963186000 | 8.846468000  |
| O | -1.550678000 | 10.895082000 | 7.773368000  |
| O | -2.773668000 | 13.045559000 | 7.163265000  |
| C | -1.135125000 | 12.279302000 | 10.078784000 |
| C | -2.087324000 | 9.958843000  | 6.823573000  |
| C | -3.867763000 | 12.775133000 | 8.037710000  |
| H | -0.859222000 | 12.963907000 | 10.874350000 |
| H | -2.183901000 | 12.009029000 | 10.177509000 |
| H | -0.532616000 | 11.376910000 | 10.148089000 |
| H | -3.039295000 | 9.595164000  | 7.203146000  |
| H | -2.234844000 | 10.418212000 | 5.846710000  |
| H | -1.394985000 | 9.125769000  | 6.740399000  |
| H | -3.794533000 | 13.376702000 | 8.944856000  |
| H | -4.775109000 | 13.038707000 | 7.503041000  |
| H | -3.909057000 | 11.722356000 | 8.312349000  |

64

structure of TS\_IM3\_IM4

|    |             |              |             |
|----|-------------|--------------|-------------|
| Ir | 0.134933000 | 12.585549000 | 5.684980000 |
| C  | 1.926806000 | 10.026969000 | 5.672853000 |
| H  | 2.891823000 | 10.108039000 | 5.171481000 |
| H  | 1.706489000 | 8.961675000  | 5.710461000 |
| C  | 2.002753000 | 10.588674000 | 7.084609000 |
| H  | 1.289946000 | 10.067538000 | 7.725560000 |
| H  | 2.984186000 | 10.415427000 | 7.537643000 |
| C  | 1.675384000 | 12.054488000 | 7.140884000 |
| H  | 1.413814000 | 12.399115000 | 8.133998000 |
| C  | 2.160924000 | 13.051679000 | 6.266179000 |
| H  | 2.187830000 | 14.055373000 | 6.680874000 |
| C  | 3.190517000 | 12.777653000 | 5.183513000 |
| H  | 3.870824000 | 12.001072000 | 5.535443000 |
| H  | 3.810535000 | 13.664669000 | 5.058739000 |
| C  | 2.573940000 | 12.386276000 | 3.836551000 |
| H  | 2.506128000 | 13.268847000 | 3.199164000 |
| H  | 3.232032000 | 11.693807000 | 3.302507000 |
| C  | 1.190216000 | 11.808389000 | 3.971002000 |
| H  | 0.557447000 | 11.908049000 | 3.095235000 |
| C  | 0.869296000 | 10.734829000 | 4.850469000 |

|    |              |              |              |
|----|--------------|--------------|--------------|
| H  | 0.007852000  | 10.138909000 | 4.571528000  |
| C  | -0.726230000 | 14.890549000 | 5.564258000  |
| C  | 0.096206000  | 14.806974000 | 4.453325000  |
| H  | -1.767913000 | 14.614899000 | 5.573783000  |
| H  | -0.182598000 | 14.346227000 | 3.519105000  |
| Br | -2.050222000 | 12.160664000 | 4.384251000  |
| C  | 1.250406000  | 15.658829000 | 4.657309000  |
| C  | 1.155969000  | 16.310669000 | 5.830394000  |
| C  | -0.123641000 | 15.906621000 | 6.505728000  |
| H  | 1.881461000  | 16.969191000 | 6.280473000  |
| P  | -1.275184000 | 17.254498000 | 6.622985000  |
| O  | -0.616029000 | 18.282241000 | 7.583500000  |
| O  | -1.662168000 | 17.886806000 | 5.254875000  |
| O  | -2.628315000 | 16.837691000 | 7.253142000  |
| C  | -1.285837000 | 19.493792000 | 8.010264000  |
| C  | -0.762532000 | 18.563701000 | 4.346496000  |
| C  | -3.767835000 | 16.284284000 | 6.540566000  |
| H  | -0.561503000 | 20.044938000 | 8.596475000  |
| H  | -2.148570000 | 19.241069000 | 8.618952000  |
| H  | -1.590000000 | 20.080565000 | 7.147030000  |
| H  | -1.334878000 | 19.363422000 | 3.889735000  |
| H  | -0.430416000 | 17.857904000 | 3.593163000  |
| H  | 0.093393000  | 18.971155000 | 4.879222000  |
| H  | -3.896580000 | 16.794038000 | 5.591301000  |
| H  | -4.625371000 | 16.458058000 | 7.179662000  |
| H  | -3.615719000 | 15.218776000 | 6.392095000  |
| H  | 0.013732000  | 15.548208000 | 7.531752000  |
| H  | 2.077584000  | 15.737669000 | 3.967452000  |
| P  | -1.108699000 | 12.656862000 | 7.619555000  |
| O  | -0.500417000 | 13.545947000 | 8.824745000  |
| O  | -1.326521000 | 11.283364000 | 8.432357000  |
| O  | -2.600903000 | 13.249145000 | 7.450445000  |
| C  | -0.487192000 | 13.155634000 | 10.202098000 |
| C  | -1.801216000 | 10.135649000 | 7.714944000  |
| C  | -3.512705000 | 13.278275000 | 8.547544000  |
| H  | -0.069318000 | 13.990154000 | 10.756358000 |
| H  | -1.488367000 | 12.940334000 | 10.568960000 |
| H  | 0.134987000  | 12.274809000 | 10.345868000 |
| H  | -1.706535000 | 9.287697000  | 8.384656000  |
| H  | -2.843195000 | 10.266779000 | 7.426257000  |
| H  | -1.207702000 | 9.972862000  | 6.814802000  |
| H  | -3.285255000 | 14.112384000 | 9.213059000  |
| H  | -4.509324000 | 13.406797000 | 8.135121000  |

|   |              |              |             |
|---|--------------|--------------|-------------|
| H | -3.483615000 | 12.348447000 | 9.113500000 |
|---|--------------|--------------|-------------|

26

structure of diene

|   |              |              |             |
|---|--------------|--------------|-------------|
| C | -0.576788000 | 14.898577000 | 5.712901000 |
| C | 0.064161000  | 14.755876000 | 4.540336000 |
| H | -1.391670000 | 14.311223000 | 6.103031000 |
| H | -0.153789000 | 14.009654000 | 3.791861000 |
| C | 1.124119000  | 15.740684000 | 4.435752000 |
| C | 1.150517000  | 16.499589000 | 5.544615000 |
| C | 0.059729000  | 16.032674000 | 6.459218000 |
| H | 1.847624000  | 17.283835000 | 5.789885000 |
| P | -1.117282000 | 17.341192000 | 6.731415000 |
| O | -0.493525000 | 18.556083000 | 7.461918000 |
| O | -1.718850000 | 17.931964000 | 5.426486000 |
| O | -2.185999000 | 16.716230000 | 7.664139000 |
| C | 0.051471000  | 19.736886000 | 6.818737000 |
| C | -2.565010000 | 17.227159000 | 4.484326000 |
| C | -3.278316000 | 17.479430000 | 8.240592000 |
| H | 0.616137000  | 20.255413000 | 7.583269000 |
| H | -0.762197000 | 20.357874000 | 6.459280000 |
| H | 0.701116000  | 19.456811000 | 5.994337000 |
| H | -3.276003000 | 17.955013000 | 4.110345000 |
| H | -3.087077000 | 16.407521000 | 4.972026000 |
| H | -1.948124000 | 16.849920000 | 3.676348000 |
| H | -2.881449000 | 18.240370000 | 8.905246000 |
| H | -3.874928000 | 16.768309000 | 8.797360000 |
| H | -3.875054000 | 17.932301000 | 7.453016000 |
| H | 0.420681000  | 15.744407000 | 7.451210000 |
| H | 1.803418000  | 15.823437000 | 3.601642000 |

38

structure of IM4

|    |             |              |             |
|----|-------------|--------------|-------------|
| Ir | 1.021286000 | 13.023348000 | 5.322988000 |
| C  | 1.801630000 | 11.148092000 | 7.703841000 |
| H  | 2.652770000 | 10.481934000 | 7.570446000 |
| H  | 1.251125000 | 10.754172000 | 8.556998000 |
| C  | 2.273388000 | 12.570881000 | 8.019853000 |
| H  | 1.517635000 | 13.068637000 | 8.628957000 |
| H  | 3.178457000 | 12.543791000 | 8.636356000 |
| C  | 2.493443000 | 13.412747000 | 6.792932000 |
| H  | 2.556625000 | 14.475315000 | 7.007704000 |
| C  | 3.134324000 | 12.977195000 | 5.598655000 |
| H  | 3.601137000 | 13.756669000 | 5.008643000 |
| C  | 3.753461000 | 11.603133000 | 5.425232000 |

|    |              |              |             |
|----|--------------|--------------|-------------|
| H  | 4.120770000  | 11.237545000 | 6.384262000 |
| H  | 4.636137000  | 11.686715000 | 4.792597000 |
| C  | 2.786174000  | 10.597456000 | 4.795561000 |
| H  | 2.835320000  | 10.684635000 | 3.710162000 |
| H  | 3.092764000  | 9.571240000  | 5.023832000 |
| C  | 1.358566000  | 10.809648000 | 5.203472000 |
| H  | 0.608934000  | 10.495344000 | 4.486521000 |
| C  | 0.917418000  | 11.090567000 | 6.485446000 |
| H  | -0.148751000 | 10.999545000 | 6.660058000 |
| P  | 0.971385000  | 15.170619000 | 4.686071000 |
| O  | 0.102071000  | 16.234717000 | 5.510356000 |
| O  | 0.441410000  | 15.528191000 | 3.208130000 |
| O  | 2.402697000  | 15.884848000 | 4.785560000 |
| C  | -1.304313000 | 16.044407000 | 5.672445000 |
| C  | 0.802644000  | 14.701098000 | 2.104480000 |
| C  | 2.557132000  | 17.265405000 | 4.458337000 |
| H  | -1.664159000 | 16.884561000 | 6.258147000 |
| H  | -1.805174000 | 16.025339000 | 4.706052000 |
| H  | -1.511661000 | 15.110520000 | 6.193193000 |
| H  | 0.215265000  | 15.036703000 | 1.255618000 |
| H  | 1.863854000  | 14.806137000 | 1.873424000 |
| H  | 0.573121000  | 13.655897000 | 2.312835000 |
| H  | 2.149074000  | 17.891857000 | 5.248707000 |
| H  | 3.622367000  | 17.449720000 | 4.358998000 |
| H  | 2.056747000  | 17.502025000 | 3.520160000 |
| Br | -1.295913000 | 12.651976000 | 4.371321000 |

54

structure of TS\_IM4\_IM5

|    |             |              |             |
|----|-------------|--------------|-------------|
| Ir | 0.876144000 | 12.738378000 | 5.344933000 |
| C  | 1.868293000 | 10.192461000 | 6.830857000 |
| H  | 2.714353000 | 9.628085000  | 6.438060000 |
| H  | 1.356519000 | 9.515289000  | 7.513096000 |
| C  | 2.356660000 | 11.419142000 | 7.614340000 |
| H  | 1.670423000 | 11.609066000 | 8.440975000 |
| H  | 3.327993000 | 11.214123000 | 8.077876000 |
| C  | 2.429658000 | 12.671916000 | 6.782496000 |
| H  | 2.430971000 | 13.588543000 | 7.362642000 |
| C  | 3.009729000 | 12.738046000 | 5.485519000 |
| H  | 3.405755000 | 13.703424000 | 5.195564000 |
| C  | 3.682737000 | 11.557730000 | 4.812311000 |
| H  | 4.088581000 | 10.884312000 | 5.567422000 |
| H  | 4.543698000 | 11.909447000 | 4.244798000 |
| C  | 2.729633000 | 10.814853000 | 3.879508000 |

|                  |              |              |              |
|------------------|--------------|--------------|--------------|
| H                | 2.725514000  | 11.304419000 | 2.904593000  |
| H                | 3.075824000  | 9.791376000  | 3.698685000  |
| C                | 1.318424000  | 10.801293000 | 4.387534000  |
| H                | 0.553016000  | 10.695483000 | 3.627597000  |
| C                | 0.928189000  | 10.547517000 | 5.704044000  |
| H                | -0.115778000 | 10.292137000 | 5.849393000  |
| P                | 0.827817000  | 14.983825000 | 5.170347000  |
| O                | -0.270309000 | 15.924952000 | 5.873464000  |
| O                | 0.713852000  | 15.590594000 | 3.676965000  |
| O                | 2.141203000  | 15.667674000 | 5.791417000  |
| C                | -1.608861000 | 16.031176000 | 5.390116000  |
| C                | 1.222609000  | 14.859851000 | 2.563797000  |
| C                | 2.297743000  | 17.083996000 | 5.798559000  |
| H                | -2.164125000 | 16.587037000 | 6.140734000  |
| H                | -1.624317000 | 16.568078000 | 4.443103000  |
| H                | -2.057223000 | 15.048970000 | 5.252539000  |
| H                | 1.002963000  | 15.449938000 | 1.678989000  |
| H                | 2.301905000  | 14.719729000 | 2.643576000  |
| H                | 0.737613000  | 13.886212000 | 2.489934000  |
| H                | 1.692886000  | 17.529073000 | 6.586512000  |
| H                | 3.347926000  | 17.286805000 | 5.986520000  |
| H                | 2.010226000  | 17.516429000 | 4.840836000  |
| Br               | -1.426730000 | 12.592120000 | 4.195976000  |
| P                | -0.733266000 | 13.301734000 | 8.115217000  |
| O                | -1.040675000 | 12.440728000 | 9.465253000  |
| O                | -2.044831000 | 14.287012000 | 8.030981000  |
| O                | 0.323732000  | 14.430358000 | 8.600538000  |
| C                | -1.392710000 | 13.049880000 | 10.699837000 |
| C                | -3.250623000 | 13.692626000 | 7.560307000  |
| C                | -0.001116000 | 15.717849000 | 9.108859000  |
| H                | -1.746389000 | 12.267291000 | 11.365670000 |
| H                | -0.525219000 | 13.532271000 | 11.151778000 |
| H                | -2.183814000 | 13.789536000 | 10.566262000 |
| H                | -3.074085000 | 13.091064000 | 6.665784000  |
| H                | -3.703231000 | 13.065789000 | 8.330627000  |
| H                | -3.935784000 | 14.499777000 | 7.315002000  |
| H                | -0.675283000 | 15.664671000 | 9.963009000  |
| H                | 0.935057000  | 16.174052000 | 9.421704000  |
| H                | -0.460424000 | 16.328195000 | 8.333450000  |
| 54               |              |              |              |
| structure of IM5 |              |              |              |
| Ir               | 0.651647000  | 12.856552000 | 5.854399000  |
| C                | 1.594241000  | 10.020477000 | 6.703520000  |



|    |              |              |              |
|----|--------------|--------------|--------------|
| H  | 2.416240000  | 9.534529000  | 6.172560000  |
| H  | 1.049123000  | 9.210480000  | 7.186457000  |
| C  | 2.125291000  | 10.972915000 | 7.775130000  |
| H  | 1.455263000  | 10.956546000 | 8.632397000  |
| H  | 3.104103000  | 10.651990000 | 8.150603000  |
| C  | 2.223389000  | 12.402141000 | 7.305822000  |
| H  | 2.245441000  | 13.138388000 | 8.102843000  |
| C  | 2.827915000  | 12.785739000 | 6.087074000  |
| H  | 3.211130000  | 13.795382000 | 6.050709000  |
| C  | 3.540645000  | 11.791522000 | 5.188688000  |
| H  | 3.928638000  | 10.977949000 | 5.803562000  |
| H  | 4.417583000  | 12.276651000 | 4.760435000  |
| C  | 2.639063000  | 11.255545000 | 4.084960000  |
| H  | 2.760061000  | 11.869433000 | 3.191157000  |
| H  | 2.938295000  | 10.243037000 | 3.788424000  |
| C  | 1.188805000  | 11.299034000 | 4.487264000  |
| H  | 0.500267000  | 11.272999000 | 3.648549000  |
| C  | 0.681782000  | 10.724733000 | 5.713336000  |
| H  | -0.324335000 | 10.324116000 | 5.650812000  |
| P  | 0.847379000  | 15.070673000 | 5.174200000  |
| O  | -0.175028000 | 16.214534000 | 5.681885000  |
| O  | 0.757849000  | 15.427821000 | 3.593687000  |
| O  | 2.210630000  | 15.775526000 | 5.658856000  |
| C  | -1.514284000 | 16.325686000 | 5.208829000  |
| C  | 1.215790000  | 14.483659000 | 2.633701000  |
| C  | 2.451876000  | 17.157066000 | 5.405610000  |
| H  | -1.843223000 | 17.335840000 | 5.442512000  |
| H  | -1.564943000 | 16.164100000 | 4.134067000  |
| H  | -2.156754000 | 15.602729000 | 5.708126000  |
| H  | 0.947545000  | 14.873788000 | 1.656258000  |
| H  | 2.300151000  | 14.366212000 | 2.685535000  |
| H  | 0.737829000  | 13.514988000 | 2.785084000  |
| H  | 1.885105000  | 17.774981000 | 6.099564000  |
| H  | 3.514849000  | 17.326061000 | 5.551235000  |
| H  | 2.178015000  | 17.423289000 | 4.385344000  |
| Br | -1.584557000 | 12.887890000 | 4.524309000  |
| P  | -0.411352000 | 13.608218000 | 7.803758000  |
| O  | -0.409648000 | 12.519928000 | 9.005382000  |
| O  | -1.937720000 | 14.155064000 | 7.821069000  |
| O  | 0.296337000  | 14.893629000 | 8.473103000  |
| C  | -0.785100000 | 12.896706000 | 10.324410000 |
| C  | -3.006717000 | 13.227875000 | 7.626089000  |
| C  | -0.383343000 | 16.014282000 | 9.023669000  |

|   |              |              |              |
|---|--------------|--------------|--------------|
| H | -0.832185000 | 11.989196000 | 10.919085000 |
| H | -0.046278000 | 13.571212000 | 10.757759000 |
| H | -1.761991000 | 13.382694000 | 10.338809000 |
| H | -3.702217000 | 13.655944000 | 6.909844000  |
| H | -2.652717000 | 12.277286000 | 7.229924000  |
| H | -3.510828000 | 13.060905000 | 8.578240000  |
| H | -1.089063000 | 15.723042000 | 9.800902000  |
| H | 0.380244000  | 16.656972000 | 9.453428000  |
| H | -0.917381000 | 16.558372000 | 8.246927000  |

54

structure of TS\_IM5\_IM6

|    |              |              |              |
|----|--------------|--------------|--------------|
| Ir | 0.046349000  | -0.577597000 | -0.553416000 |
| C  | 1.019766000  | -3.233456000 | 0.709488000  |
| H  | 1.735879000  | -3.904309000 | 0.228777000  |
| H  | 0.490950000  | -3.850416000 | 1.434579000  |
| C  | 1.753816000  | -2.110392000 | 1.456758000  |
| H  | 1.263299000  | -1.938248000 | 2.413292000  |
| H  | 2.780575000  | -2.408443000 | 1.697665000  |
| C  | 1.776562000  | -0.801727000 | 0.704709000  |
| H  | 1.922725000  | 0.078148000  | 1.322057000  |
| C  | 2.226720000  | -0.714239000 | -0.643300000 |
| H  | 2.641479000  | 0.240102000  | -0.935956000 |
| C  | 2.804476000  | -1.911504000 | -1.375262000 |
| H  | 3.203237000  | -2.619535000 | -0.647148000 |
| H  | 3.660603000  | -1.589158000 | -1.968197000 |
| C  | 1.760090000  | -2.567518000 | -2.257285000 |
| H  | 1.759978000  | -2.085981000 | -3.236344000 |
| H  | 1.990617000  | -3.623297000 | -2.445826000 |
| C  | 0.384017000  | -2.418697000 | -1.669390000 |
| H  | -0.416270000 | -2.519360000 | -2.393550000 |
| C  | 0.022250000  | -2.730711000 | -0.321631000 |
| H  | -0.993615000 | -3.085393000 | -0.186889000 |
| P  | 0.250693000  | 1.606421000  | -1.170647000 |
| O  | -0.763355000 | 2.746733000  | -0.650508000 |
| O  | 0.218726000  | 2.005539000  | -2.740796000 |
| O  | 1.609841000  | 2.266961000  | -0.619305000 |
| C  | -2.099354000 | 2.877377000  | -1.127583000 |
| C  | 0.673177000  | 1.072262000  | -3.715054000 |
| C  | 1.896709000  | 3.644426000  | -0.842871000 |
| H  | -2.423073000 | 3.883484000  | -0.870990000 |
| H  | -2.145522000 | 2.740356000  | -2.205993000 |
| H  | -2.748254000 | 2.146155000  | -0.649116000 |
| H  | 0.431716000  | 1.492641000  | -4.686833000 |

|    |              |              |              |
|----|--------------|--------------|--------------|
| H  | 1.753190000  | 0.927043000  | -3.646023000 |
| H  | 0.169459000  | 0.112347000  | -3.594123000 |
| H  | 1.310172000  | 4.268934000  | -0.171650000 |
| H  | 2.954497000  | 3.785597000  | -0.640920000 |
| H  | 1.682373000  | 3.928581000  | -1.872563000 |
| Br | -2.186481000 | -0.508130000 | -1.969207000 |
| P  | -1.115520000 | 0.027286000  | 1.400728000  |
| O  | -1.159014000 | -1.183623000 | 2.475832000  |
| O  | -2.635804000 | 0.595728000  | 1.443872000  |
| O  | -0.405720000 | 1.230172000  | 2.202671000  |
| C  | -1.569556000 | -0.946162000 | 3.817448000  |
| C  | -3.715000000 | -0.280187000 | 1.112933000  |
| C  | -1.081519000 | 2.314087000  | 2.828119000  |
| H  | -1.659190000 | -1.912630000 | 4.304355000  |
| H  | -0.828042000 | -0.346110000 | 4.345430000  |
| H  | -2.533432000 | -0.436596000 | 3.856103000  |
| H  | -4.330271000 | 0.198949000  | 0.356586000  |
| H  | -3.361301000 | -1.228378000 | 0.710365000  |
| H  | -4.305398000 | -0.464013000 | 2.010579000  |
| H  | -1.806901000 | 1.971808000  | 3.565196000  |
| H  | -0.318183000 | 2.908119000  | 3.322881000  |
| H  | -1.593165000 | 2.926562000  | 2.087951000  |

54

structure of IM6

|    |              |              |              |
|----|--------------|--------------|--------------|
| Ir | 0.137465000  | -0.519879000 | -0.469191000 |
| C  | 1.533250000  | -3.045510000 | 0.937493000  |
| H  | 2.104190000  | -3.728862000 | 0.309558000  |
| H  | 1.347243000  | -3.581345000 | 1.867680000  |
| C  | 2.338137000  | -1.780904000 | 1.226076000  |
| H  | 2.033632000  | -1.380131000 | 2.194866000  |
| H  | 3.403925000  | -2.017946000 | 1.322420000  |
| C  | 2.125414000  | -0.697675000 | 0.202734000  |
| H  | 2.517640000  | 0.256844000  | 0.535038000  |
| C  | 2.125786000  | -0.893358000 | -1.233882000 |
| H  | 2.564446000  | -0.069120000 | -1.785808000 |
| C  | 2.334842000  | -2.241399000 | -1.904738000 |
| H  | 3.014848000  | -2.858945000 | -1.314162000 |
| H  | 2.841733000  | -2.095421000 | -2.858656000 |
| C  | 1.013040000  | -2.958277000 | -2.158780000 |
| H  | 0.575750000  | -2.577534000 | -3.083035000 |
| H  | 1.158690000  | -4.033519000 | -2.314501000 |
| C  | -0.009337000 | -2.748224000 | -1.080971000 |
| H  | -1.038762000 | -2.810732000 | -1.411386000 |

|    |              |              |              |
|----|--------------|--------------|--------------|
| C  | 0.210401000  | -2.757065000 | 0.278564000  |
| H  | -0.661550000 | -2.838481000 | 0.910474000  |
| P  | 0.330105000  | 1.670282000  | -0.910818000 |
| O  | -0.796295000 | 2.709853000  | -0.445224000 |
| O  | 0.468005000  | 2.162769000  | -2.431025000 |
| O  | 1.590208000  | 2.312491000  | -0.164828000 |
| C  | -2.067934000 | 2.800261000  | -1.091300000 |
| C  | 1.056718000  | 1.400710000  | -3.479248000 |
| C  | 1.854758000  | 3.710818000  | -0.251232000 |
| H  | -2.538402000 | 3.703556000  | -0.711691000 |
| H  | -1.948396000 | 2.865352000  | -2.170405000 |
| H  | -2.679462000 | 1.932124000  | -0.855785000 |
| H  | 0.660464000  | 1.793457000  | -4.410873000 |
| H  | 2.140889000  | 1.518544000  | -3.466709000 |
| H  | 0.787970000  | 0.348550000  | -3.394026000 |
| H  | 1.169510000  | 4.264946000  | 0.387693000  |
| H  | 2.874410000  | 3.860785000  | 0.090197000  |
| H  | 1.757484000  | 4.067880000  | -1.275747000 |
| Br | -1.767936000 | -0.397910000 | -2.509423000 |
| P  | -1.176596000 | -0.026412000 | 1.326685000  |
| O  | -1.241916000 | -1.217673000 | 2.432486000  |
| O  | -2.720790000 | 0.499934000  | 1.307436000  |
| O  | -0.560079000 | 1.208380000  | 2.162585000  |
| C  | -1.779824000 | -0.967269000 | 3.723523000  |
| C  | -3.694796000 | -0.346940000 | 0.697066000  |
| C  | -1.309890000 | 2.263717000  | 2.747191000  |
| H  | -1.854944000 | -1.922981000 | 4.234268000  |
| H  | -1.122528000 | -0.309619000 | 4.292963000  |
| H  | -2.770930000 | -0.515148000 | 3.662267000  |
| H  | -3.345439000 | -0.713728000 | -0.269983000 |
| H  | -3.932496000 | -1.189755000 | 1.348319000  |
| H  | -4.589842000 | 0.250891000  | 0.550013000  |
| H  | -2.060988000 | 1.895359000  | 3.445155000  |
| H  | -0.597811000 | 2.887684000  | 3.281195000  |
| H  | -1.804008000 | 2.856572000  | 1.979477000  |

54

structure of IM6'

|    |             |              |              |
|----|-------------|--------------|--------------|
| Ir | 0.117321000 | -0.596752000 | -0.529399000 |
| C  | 1.565751000 | -2.995357000 | 1.023550000  |
| H  | 2.195645000 | -3.681310000 | 0.458671000  |
| H  | 1.358373000 | -3.491650000 | 1.970943000  |
| C  | 2.301274000 | -1.683260000 | 1.287030000  |
| H  | 1.935445000 | -1.252840000 | 2.221425000  |

|    |              |              |              |
|----|--------------|--------------|--------------|
| H  | 3.370503000  | -1.865725000 | 1.443309000  |
| C  | 2.090048000  | -0.652481000 | 0.210786000  |
| H  | 2.419318000  | 0.329170000  | 0.527700000  |
| C  | 2.154767000  | -0.896888000 | -1.214971000 |
| H  | 2.563450000  | -0.070580000 | -1.786953000 |
| C  | 2.452688000  | -2.259904000 | -1.816163000 |
| H  | 3.122026000  | -2.822469000 | -1.162514000 |
| H  | 3.004773000  | -2.133492000 | -2.746953000 |
| C  | 1.174478000  | -3.038433000 | -2.105123000 |
| H  | 0.758922000  | -2.694761000 | -3.053359000 |
| H  | 1.372117000  | -4.108982000 | -2.231665000 |
| C  | 0.100911000  | -2.853210000 | -1.073371000 |
| H  | -0.909950000 | -2.977629000 | -1.440104000 |
| C  | 0.261950000  | -2.802872000 | 0.292106000  |
| H  | -0.633207000 | -2.903745000 | 0.887118000  |
| P  | 0.232786000  | 1.594818000  | -0.938719000 |
| O  | -0.879740000 | 2.598439000  | -0.360367000 |
| O  | 0.224614000  | 2.131214000  | -2.451895000 |
| O  | 1.531199000  | 2.252759000  | -0.265099000 |
| C  | -2.161065000 | 2.707178000  | -0.993023000 |
| C  | 0.859641000  | 1.430078000  | -3.519833000 |
| C  | 1.714851000  | 3.668693000  | -0.298316000 |
| H  | -2.857657000 | 3.050469000  | -0.233281000 |
| H  | -2.106655000 | 3.430929000  | -1.803973000 |
| H  | -2.488458000 | 1.747505000  | -1.393279000 |
| H  | 0.375208000  | 1.750635000  | -4.436729000 |
| H  | 1.918988000  | 1.687068000  | -3.554270000 |
| H  | 0.731372000  | 0.354139000  | -3.408177000 |
| H  | 1.062295000  | 4.151203000  | 0.427077000  |
| H  | 2.752163000  | 3.859106000  | -0.040808000 |
| H  | 1.505580000  | 4.071495000  | -1.288675000 |
| Br | -1.768006000 | -0.656272000 | -2.598362000 |
| P  | -1.166367000 | -0.086496000 | 1.260009000  |
| O  | -1.434405000 | -1.314618000 | 2.296604000  |
| O  | -2.597450000 | 0.702154000  | 1.282654000  |
| O  | -0.353329000 | 0.979665000  | 2.173350000  |
| C  | -1.945708000 | -1.039131000 | 3.596009000  |
| C  | -3.690512000 | 0.089036000  | 0.596228000  |
| C  | -0.919476000 | 2.123473000  | 2.802058000  |
| H  | -2.188574000 | -1.991276000 | 4.058443000  |
| H  | -1.198553000 | -0.526978000 | 4.202846000  |
| H  | -2.845461000 | -0.424056000 | 3.547049000  |
| H  | -3.385751000 | -0.276251000 | -0.386987000 |

|   |              |              |             |
|---|--------------|--------------|-------------|
| H | -4.09520000  | -0.737928000 | 1.181829000 |
| H | -4.459323000 | 0.848191000  | 0.479585000 |
| H | -1.721383000 | 1.859823000  | 3.491242000 |
| H | -0.114181000 | 2.600027000  | 3.355744000 |
| H | -1.308042000 | 2.818081000  | 2.059003000 |

53

structure of IM7'

|    |              |              |             |
|----|--------------|--------------|-------------|
| Ir | 0.958082000  | 12.747752000 | 5.395876000 |
| C  | 1.995516000  | 11.030547000 | 7.806384000 |
| H  | 2.908449000  | 10.452052000 | 7.692064000 |
| H  | 1.489746000  | 10.615148000 | 8.675392000 |
| C  | 2.313904000  | 12.503526000 | 8.086097000 |
| H  | 1.477397000  | 12.959451000 | 8.615730000 |
| H  | 3.168044000  | 12.582495000 | 8.764523000 |
| C  | 2.567463000  | 13.317091000 | 6.856190000 |
| H  | 2.448051000  | 14.387413000 | 6.989529000 |
| C  | 3.202894000  | 12.899834000 | 5.696352000 |
| H  | 3.481505000  | 13.682024000 | 5.001435000 |
| C  | 3.871158000  | 11.565125000 | 5.488051000 |
| H  | 4.258122000  | 11.190832000 | 6.432304000 |
| H  | 4.740907000  | 11.713277000 | 4.851560000 |
| C  | 2.954889000  | 10.530960000 | 4.825782000 |
| H  | 2.940331000  | 10.699712000 | 3.748998000 |
| H  | 3.361473000  | 9.524368000  | 4.958809000 |
| C  | 1.538894000  | 10.573282000 | 5.309015000 |
| H  | 0.821430000  | 10.128320000 | 4.626854000 |
| C  | 1.109457000  | 10.833682000 | 6.601559000 |
| H  | 0.072774000  | 10.608873000 | 6.825707000 |
| P  | -1.157929000 | 12.438287000 | 4.699630000 |
| O  | -2.086033000 | 13.695053000 | 5.026117000 |
| O  | -2.131913000 | 11.288008000 | 5.272868000 |
| O  | -1.166369000 | 12.210083000 | 3.109431000 |
| C  | -3.510764000 | 13.642179000 | 5.204127000 |
| C  | -1.999672000 | 9.915445000  | 4.898152000 |
| C  | -2.364045000 | 12.254051000 | 2.323065000 |
| H  | -3.872476000 | 14.658878000 | 5.087380000 |
| H  | -3.988609000 | 13.001766000 | 4.467117000 |
| H  | -3.749566000 | 13.277845000 | 6.199190000 |
| H  | -2.987530000 | 9.469320000  | 4.963991000 |
| H  | -1.630173000 | 9.814434000  | 3.878072000 |
| H  | -1.330486000 | 9.394419000  | 5.580418000 |
| H  | -2.770645000 | 13.264549000 | 2.308915000 |
| H  | -2.091250000 | 11.963071000 | 1.313934000 |

|   |              |              |             |
|---|--------------|--------------|-------------|
| H | -3.116893000 | 11.563716000 | 2.703256000 |
| P | 0.717410000  | 14.909175000 | 4.799302000 |
| O | -0.015536000 | 15.773508000 | 5.913162000 |
| O | -0.140272000 | 15.332597000 | 3.504908000 |
| O | 2.149779000  | 15.593595000 | 4.570937000 |
| C | -1.024731000 | 16.762517000 | 5.662269000 |
| C | 0.287935000  | 14.902347000 | 2.206662000 |
| C | 2.247000000  | 17.001978000 | 4.305413000 |
| H | -1.364777000 | 17.103500000 | 6.633920000 |
| H | -0.622057000 | 17.602723000 | 5.100482000 |
| H | -1.852154000 | 16.327453000 | 5.109334000 |
| H | -0.551533000 | 15.048655000 | 1.534316000 |
| H | 1.130438000  | 15.500618000 | 1.863776000 |
| H | 0.565447000  | 13.848729000 | 2.213840000 |
| H | 2.060975000  | 17.568838000 | 5.215432000 |
| H | 3.256771000  | 17.191666000 | 3.959241000 |
| H | 1.537090000  | 17.305839000 | 3.536949000 |

53

structure of IM7

|    |              |              |             |
|----|--------------|--------------|-------------|
| Ir | 0.926292000  | 12.801597000 | 5.416560000 |
| C  | 1.984787000  | 10.992388000 | 7.762772000 |
| H  | 2.882296000  | 10.396317000 | 7.615297000 |
| H  | 1.483117000  | 10.557662000 | 8.624832000 |
| C  | 2.341932000  | 12.446883000 | 8.086212000 |
| H  | 1.540127000  | 12.893659000 | 8.673365000 |
| H  | 3.228459000  | 12.483713000 | 8.726118000 |
| C  | 2.557876000  | 13.303312000 | 6.877785000 |
| H  | 2.445362000  | 14.369072000 | 7.046309000 |
| C  | 3.178989000  | 12.920087000 | 5.697910000 |
| H  | 3.460558000  | 13.721043000 | 5.026253000 |
| C  | 3.841568000  | 11.589570000 | 5.451555000 |
| H  | 4.235687000  | 11.192748000 | 6.384213000 |
| H  | 4.707330000  | 11.747744000 | 4.811789000 |
| C  | 2.914529000  | 10.574763000 | 4.777309000 |
| H  | 2.907642000  | 10.750549000 | 3.701654000 |
| H  | 3.304587000  | 9.560626000  | 4.905482000 |
| C  | 1.498516000  | 10.634765000 | 5.258419000 |
| H  | 0.777075000  | 10.210611000 | 4.568111000 |
| C  | 1.079881000  | 10.857385000 | 6.564082000 |
| H  | 0.044393000  | 10.629795000 | 6.791724000 |
| P  | -1.207942000 | 12.468168000 | 4.742886000 |
| O  | -2.170296000 | 13.658083000 | 5.176757000 |
| O  | -2.085416000 | 11.234455000 | 5.289320000 |

|   |              |              |             |
|---|--------------|--------------|-------------|
| O | -1.289864000 | 12.336822000 | 3.149867000 |
| C | -3.556480000 | 13.526762000 | 5.521181000 |
| C | -1.913996000 | 9.893343000  | 4.829870000 |
| C | -2.530746000 | 12.421411000 | 2.440131000 |
| H | -3.934502000 | 14.536242000 | 5.645180000 |
| H | -4.118300000 | 13.020970000 | 4.739485000 |
| H | -3.664152000 | 12.977996000 | 6.452228000 |
| H | -2.883486000 | 9.407618000  | 4.888078000 |
| H | -1.563514000 | 9.867081000  | 3.798510000 |
| H | -1.212493000 | 9.358663000  | 5.467797000 |
| H | -2.925541000 | 13.435178000 | 2.496662000 |
| H | -2.321666000 | 12.173234000 | 1.405024000 |
| H | -3.264250000 | 11.719008000 | 2.835876000 |
| P | 0.715042000  | 14.970223000 | 4.773963000 |
| O | -0.177658000 | 15.881123000 | 5.712152000 |
| O | 0.045320000  | 15.279277000 | 3.347003000 |
| O | 2.148655000  | 15.678877000 | 4.723127000 |
| C | -1.173285000 | 16.813107000 | 5.276924000 |
| C | 0.625452000  | 14.695300000 | 2.174797000 |
| C | 2.272490000  | 17.081107000 | 4.449309000 |
| H | -1.645953000 | 17.193747000 | 6.176000000 |
| H | -0.725078000 | 17.636217000 | 4.724381000 |
| H | -1.910430000 | 16.318322000 | 4.650262000 |
| H | -0.107495000 | 14.786579000 | 1.380018000 |
| H | 1.533356000  | 15.227475000 | 1.895261000 |
| H | 0.852566000  | 13.641084000 | 2.337988000 |
| H | 1.896609000  | 17.662233000 | 5.288985000 |
| H | 3.328747000  | 17.284618000 | 4.313310000 |
| H | 1.731219000  | 17.351942000 | 3.543708000 |

69

structure of 2

|    |             |              |             |
|----|-------------|--------------|-------------|
| Ir | 0.639164000 | 12.937726000 | 5.795897000 |
| C  | 2.210657000 | 10.736872000 | 7.505806000 |
| H  | 2.893292000 | 10.046980000 | 7.010711000 |
| H  | 1.960997000 | 10.268470000 | 8.456005000 |
| C  | 2.884941000 | 12.080400000 | 7.757175000 |
| H  | 2.492258000 | 12.504186000 | 8.682752000 |
| H  | 3.958863000 | 11.950794000 | 7.925974000 |
| C  | 2.644433000 | 13.074570000 | 6.652735000 |
| H  | 2.892052000 | 14.092467000 | 6.926138000 |
| C  | 2.777879000 | 12.780416000 | 5.256298000 |
| H  | 3.100433000 | 13.622635000 | 4.656411000 |
| C  | 3.237122000 | 11.434371000 | 4.722710000 |



|   |              |              |             |
|---|--------------|--------------|-------------|
| H | 3.905001000  | 10.967642000 | 5.447151000 |
| H | 3.845616000  | 11.591113000 | 3.833398000 |
| C | 2.072430000  | 10.522603000 | 4.379706000 |
| H | 1.730442000  | 10.737959000 | 3.367408000 |
| H | 2.367311000  | 9.467302000  | 4.372959000 |
| C | 0.899016000  | 10.691454000 | 5.297822000 |
| H | -0.036699000 | 10.327576000 | 4.888884000 |
| C | 0.945277000  | 10.842555000 | 6.684269000 |
| H | 0.034007000  | 10.608891000 | 7.217198000 |
| P | -1.139086000 | 12.633715000 | 4.369135000 |
| O | -2.088810000 | 13.924845000 | 4.212445000 |
| O | -2.184645000 | 11.427955000 | 4.592425000 |
| O | -0.694423000 | 12.293839000 | 2.872723000 |
| C | -3.513583000 | 13.867635000 | 4.186575000 |
| C | -2.644849000 | 10.972718000 | 5.860031000 |
| C | -1.636713000 | 12.233793000 | 1.796370000 |
| H | -3.863698000 | 14.886806000 | 4.049771000 |
| H | -3.880516000 | 13.249672000 | 3.369207000 |
| H | -3.901344000 | 13.482607000 | 5.127852000 |
| H | -3.553628000 | 11.497259000 | 6.150009000 |
| H | -2.854289000 | 9.911413000  | 5.762740000 |
| H | -1.894457000 | 11.124854000 | 6.636292000 |
| H | -2.073926000 | 13.216421000 | 1.622632000 |
| H | -1.085689000 | 11.926524000 | 0.913968000 |
| H | -2.420449000 | 11.507336000 | 2.002939000 |
| P | 0.701155000  | 15.056262000 | 5.008962000 |
| O | -0.454382000 | 16.027987000 | 5.506616000 |
| O | 0.588831000  | 15.304151000 | 3.426407000 |
| O | 2.073405000  | 15.770838000 | 5.424916000 |
| C | -1.153847000 | 16.963459000 | 4.678696000 |
| C | 1.492854000  | 14.651417000 | 2.531216000 |
| C | 2.304245000  | 17.150033000 | 5.117766000 |
| H | -1.869328000 | 17.464139000 | 5.323262000 |
| H | -0.476802000 | 17.699515000 | 4.250753000 |
| H | -1.671652000 | 16.442666000 | 3.878032000 |
| H | 1.114853000  | 14.820094000 | 1.528241000 |
| H | 2.492205000  | 15.077526000 | 2.619566000 |
| H | 1.526965000  | 13.580333000 | 2.732939000 |
| H | 1.671106000  | 17.784385000 | 5.736397000 |
| H | 3.345923000  | 17.353124000 | 5.341024000 |
| H | 2.112490000  | 17.356160000 | 4.065354000 |
| P | -0.685153000 | 13.520570000 | 7.624905000 |
| O | -2.249045000 | 13.742888000 | 7.326336000 |

|   |              |              |              |
|---|--------------|--------------|--------------|
| O | -0.429733000 | 14.898153000 | 8.422702000  |
| O | -0.644646000 | 12.398382000 | 8.777843000  |
| C | -3.040840000 | 14.818269000 | 7.839433000  |
| C | 0.885671000  | 15.276160000 | 8.815376000  |
| C | -1.438158000 | 12.526664000 | 9.962664000  |
| H | -4.067103000 | 14.608476000 | 7.553099000  |
| H | -2.975702000 | 14.887991000 | 8.922582000  |
| H | -2.722115000 | 15.763052000 | 7.404423000  |
| H | 0.790751000  | 16.189399000 | 9.393794000  |
| H | 1.351963000  | 14.508800000 | 9.434541000  |
| H | 1.509272000  | 15.463252000 | 7.940880000  |
| H | -2.496228000 | 12.428548000 | 9.723455000  |
| H | -1.145535000 | 11.722682000 | 10.629196000 |
| H | -1.260802000 | 13.484393000 | 10.450212000 |

32

structure of TS\_1\_IM8

|    |              |              |              |
|----|--------------|--------------|--------------|
| Ir | -0.926284000 | 0.509211000  | -1.234856000 |
| C  | -2.542649000 | 0.912840000  | -2.544704000 |
| C  | -2.337522000 | 2.052356000  | -1.723697000 |
| C  | -2.887841000 | -0.205341000 | -1.695350000 |
| H  | -2.424038000 | 0.871939000  | -3.615331000 |
| C  | -2.518490000 | 1.631774000  | -0.362606000 |
| H  | -2.036249000 | 3.032488000  | -2.052443000 |
| C  | -2.913528000 | 0.259742000  | -0.355662000 |
| H  | -2.382132000 | 2.250769000  | 0.510048000  |
| H  | -3.126312000 | -0.328917000 | 0.520558000  |
| Br | 0.970656000  | 1.553670000  | -2.306129000 |
| H  | -3.100489000 | -1.207197000 | -2.030770000 |
| C  | 0.581872000  | -1.257696000 | -0.729423000 |
| C  | -0.345143000 | -1.151020000 | 0.294632000  |
| H  | 0.230879000  | -1.844290000 | -1.575502000 |
| C  | 2.076707000  | -1.133490000 | -0.662802000 |
| C  | -0.150977000 | -0.604426000 | 1.677467000  |
| H  | -1.231837000 | -1.764362000 | 0.179593000  |
| H  | 2.427127000  | -0.186747000 | -1.070524000 |
| H  | 2.450002000  | -1.882469000 | -1.361173000 |
| C  | 2.721824000  | -1.371808000 | 0.709983000  |
| C  | 0.566892000  | 0.739552000  | 1.820461000  |
| H  | 0.351272000  | -1.362165000 | 2.284122000  |
| H  | -1.140931000 | -0.508302000 | 2.124457000  |
| H  | 2.158187000  | -2.126068000 | 1.262523000  |
| H  | 3.689649000  | -1.832824000 | 0.528259000  |
| C  | 2.945140000  | -0.135479000 | 1.529289000  |

|   |             |             |             |
|---|-------------|-------------|-------------|
| H | 0.271417000 | 1.400519000 | 0.987907000 |
| H | 0.155461000 | 1.234119000 | 2.700945000 |
| C | 2.051852000 | 0.753799000 | 1.951508000 |
| H | 3.979870000 | 0.077058000 | 1.767222000 |
| H | 2.435615000 | 1.622767000 | 2.471997000 |

32

structure of IM8

|    |              |              |             |
|----|--------------|--------------|-------------|
| Ir | 0.940989000  | 12.690584000 | 4.361801000 |
| C  | 1.457323000  | 14.783873000 | 4.275835000 |
| C  | 0.118003000  | 14.659138000 | 4.692795000 |
| C  | 1.575540000  | 14.163054000 | 2.973812000 |
| H  | 2.265396000  | 15.210901000 | 4.846844000 |
| C  | -0.604751000 | 13.957532000 | 3.653854000 |
| H  | -0.285871000 | 14.972216000 | 5.641607000 |
| C  | 0.286454000  | 13.713330000 | 2.570519000 |
| H  | -1.648028000 | 13.688216000 | 3.688897000 |
| H  | 0.044487000  | 13.216647000 | 1.645396000 |
| Br | 1.663441000  | 11.921012000 | 6.517249000 |
| H  | 2.484545000  | 14.078073000 | 2.400581000 |
| C  | 1.517021000  | 10.704601000 | 3.244959000 |
| C  | 0.208631000  | 10.541063000 | 3.665206000 |
| H  | 1.626685000  | 11.132858000 | 2.251338000 |
| C  | 2.759910000  | 10.044021000 | 3.753502000 |
| C  | -0.355151000 | 9.644865000  | 4.726963000 |
| H  | -0.538747000 | 10.917130000 | 2.972711000 |
| H  | 2.742708000  | 9.913072000  | 4.827484000 |
| H  | 3.612340000  | 10.688706000 | 3.538811000 |
| C  | 2.976783000  | 8.701242000  | 3.047243000 |
| C  | 0.546488000  | 8.524340000  | 5.240354000 |
| H  | -1.248047000 | 9.200825000  | 4.278722000 |
| H  | -0.739387000 | 10.236371000 | 5.560194000 |
| H  | 3.077062000  | 8.871672000  | 1.972155000 |
| H  | 3.953050000  | 8.315948000  | 3.352795000 |
| C  | 1.938860000  | 7.650309000  | 3.263888000 |
| H  | 1.396021000  | 8.936876000  | 5.777981000 |
| H  | -0.022597000 | 7.977973000  | 5.990606000 |
| C  | 0.954773000  | 7.565834000  | 4.156212000 |
| H  | 2.030142000  | 6.816319000  | 2.577047000 |
| H  | 0.333773000  | 6.680108000  | 4.089219000 |

48

structure of IM1'

|    |             |              |             |
|----|-------------|--------------|-------------|
| Ir | 1.496825000 | 12.852628000 | 4.583479000 |
| C  | 0.787593000 | 10.228493000 | 6.184438000 |

|    |              |              |              |
|----|--------------|--------------|--------------|
| H  | 1.615108000  | 9.567770000  | 6.436288000  |
| H  | -0.109242000 | 9.615992000  | 6.255182000  |
| C  | 0.696124000  | 11.387013000 | 7.170379000  |
| H  | -0.336809000 | 11.736391000 | 7.219771000  |
| H  | 0.942143000  | 11.066297000 | 8.186901000  |
| C  | 1.566980000  | 12.549936000 | 6.780283000  |
| H  | 1.286602000  | 13.493862000 | 7.236790000  |
| C  | 2.873441000  | 12.474193000 | 6.280751000  |
| H  | 3.461807000  | 13.378000000 | 6.365011000  |
| C  | 3.666860000  | 11.192685000 | 6.135641000  |
| H  | 3.392301000  | 10.514860000 | 6.943573000  |
| H  | 4.717060000  | 11.426604000 | 6.291480000  |
| C  | 3.505256000  | 10.513147000 | 4.770699000  |
| H  | 4.294143000  | 10.853429000 | 4.105677000  |
| H  | 3.624926000  | 9.430386000  | 4.863952000  |
| C  | 2.189976000  | 10.811958000 | 4.107882000  |
| H  | 2.192337000  | 10.738930000 | 3.026767000  |
| C  | 0.950335000  | 10.706741000 | 4.756136000  |
| H  | 0.085118000  | 10.566579000 | 4.118736000  |
| C  | 0.875325000  | 14.951120000 | 4.531571000  |
| C  | -0.212460000 | 14.132531000 | 4.974346000  |
| C  | 0.885065000  | 14.938949000 | 3.013466000  |
| H  | 1.308067000  | 15.746657000 | 5.118353000  |
| C  | -0.525909000 | 13.234986000 | 3.916051000  |
| H  | -0.681084000 | 14.150907000 | 5.945251000  |
| C  | 0.371540000  | 13.522034000 | 2.838112000  |
| H  | -1.277152000 | 12.462051000 | 3.944564000  |
| H  | 0.347128000  | 13.022377000 | 1.882344000  |
| Br | 3.749485000  | 13.557315000 | 3.404980000  |
| H  | 1.896339000  | 15.058491000 | 2.609594000  |
| P  | -0.090713000 | 16.213813000 | 2.226845000  |
| O  | 0.756254000  | 17.516189000 | 2.232428000  |
| O  | -1.431481000 | 16.651077000 | 2.919017000  |
| O  | -0.392264000 | 15.649624000 | 0.800018000  |
| C  | 0.225998000  | 18.864757000 | 2.167900000  |
| H  | 1.087251000  | 19.520513000 | 2.157762000  |
| H  | -0.355802000 | 19.003304000 | 1.260650000  |
| H  | -0.389423000 | 19.059035000 | 3.040464000  |
| C  | -2.630237000 | 15.844552000 | 2.965076000  |
| H  | -2.715961000 | 15.402344000 | 3.952576000  |
| H  | -3.467403000 | 16.510633000 | 2.784940000  |
| H  | -2.609667000 | 15.063036000 | 2.208261000  |
| C  | -1.094095000 | 16.371398000 | -0.238030000 |

|   |              |              |              |
|---|--------------|--------------|--------------|
| H | -0.418273000 | 17.079419000 | -0.709034000 |
| H | -1.413715000 | 15.632433000 | -0.962984000 |
| H | -1.962380000 | 16.887677000 | 0.167331000  |

47

structure of IMs'

|    |              |              |             |
|----|--------------|--------------|-------------|
| Ir | 0.946972000  | 12.737320000 | 4.840718000 |
| C  | 1.383892000  | 9.940100000  | 6.243962000 |
| H  | 2.408728000  | 9.590056000  | 6.331047000 |
| H  | 0.753833000  | 9.065912000  | 6.388879000 |
| C  | 1.059964000  | 10.966572000 | 7.335901000 |
| H  | -0.008638000 | 10.957811000 | 7.547781000 |
| H  | 1.542553000  | 10.682244000 | 8.275270000 |
| C  | 1.456321000  | 12.363239000 | 6.985979000 |
| H  | 0.934197000  | 13.138826000 | 7.537305000 |
| C  | 2.602967000  | 12.751115000 | 6.286354000 |
| H  | 2.866198000  | 13.801704000 | 6.370566000 |
| C  | 3.724995000  | 11.828605000 | 5.861152000 |
| H  | 3.816430000  | 11.007331000 | 6.566546000 |
| H  | 4.661129000  | 12.377487000 | 5.927474000 |
| C  | 3.552921000  | 11.315112000 | 4.426993000 |
| H  | 3.960447000  | 12.045764000 | 3.728030000 |
| H  | 4.143226000  | 10.409520000 | 4.266047000 |
| C  | 2.121947000  | 11.053717000 | 4.042685000 |
| H  | 1.922545000  | 11.048258000 | 2.974894000 |
| C  | 1.151556000  | 10.473926000 | 4.857221000 |
| H  | 0.243584000  | 10.141658000 | 4.366013000 |
| C  | 0.204900000  | 14.793129000 | 4.817204000 |
| C  | -0.837102000 | 13.932202000 | 5.207657000 |
| C  | 0.422911000  | 14.677562000 | 3.322337000 |
| H  | 0.600574000  | 15.597750000 | 5.418064000 |
| C  | -1.104151000 | 13.022248000 | 4.124986000 |
| H  | -1.330913000 | 13.929251000 | 6.166804000 |
| C  | -0.228355000 | 13.334019000 | 3.073940000 |
| H  | -1.831353000 | 12.225759000 | 4.133889000 |
| H  | -0.199054000 | 12.831432000 | 2.119944000 |
| H  | 1.493862000  | 14.659742000 | 3.070960000 |
| P  | -0.178060000 | 16.071627000 | 2.325997000 |
| O  | 0.979849000  | 17.090641000 | 2.371561000 |
| O  | -1.417765000 | 16.814802000 | 2.893641000 |
| O  | -0.464648000 | 15.430273000 | 0.942252000 |
| C  | 0.900327000  | 18.516146000 | 2.035919000 |
| H  | 1.748182000  | 18.979459000 | 2.523383000 |
| H  | 0.978266000  | 18.628609000 | 0.959483000 |

|   |              |              |              |
|---|--------------|--------------|--------------|
| H | -0.029441000 | 18.932074000 | 2.410354000  |
| C | -2.817940000 | 16.448433000 | 2.714608000  |
| H | -3.340375000 | 17.348556000 | 2.410807000  |
| H | -2.922769000 | 15.676646000 | 1.956501000  |
| H | -3.197372000 | 16.102210000 | 3.669514000  |
| C | -0.829447000 | 16.167043000 | -0.270494000 |
| H | 0.080588000  | 16.440208000 | -0.794141000 |
| H | -1.420072000 | 15.486077000 | -0.870793000 |
| H | -1.413568000 | 17.050310000 | -0.023148000 |

47

structure of 3

|    |              |              |             |
|----|--------------|--------------|-------------|
| Ir | 1.213437000  | 12.465093000 | 4.373651000 |
| C  | 1.492710000  | 10.886995000 | 7.108863000 |
| H  | 2.400161000  | 10.310149000 | 7.280051000 |
| H  | 0.747574000  | 10.471376000 | 7.784436000 |
| C  | 1.718395000  | 12.357973000 | 7.436570000 |
| H  | 0.781353000  | 12.812996000 | 7.759965000 |
| H  | 2.400888000  | 12.475347000 | 8.282936000 |
| C  | 2.246221000  | 13.137003000 | 6.269471000 |
| H  | 2.077872000  | 14.205973000 | 6.315958000 |
| C  | 3.248238000  | 12.719849000 | 5.399940000 |
| H  | 3.719778000  | 13.497903000 | 4.816654000 |
| C  | 4.021064000  | 11.430058000 | 5.511088000 |
| H  | 4.172121000  | 11.209083000 | 6.567792000 |
| H  | 5.011879000  | 11.597411000 | 5.096866000 |
| C  | 3.382671000  | 10.231361000 | 4.793175000 |
| H  | 3.829849000  | 10.118132000 | 3.810589000 |
| H  | 3.599294000  | 9.308418000  | 5.337534000 |
| C  | 1.898764000  | 10.349971000 | 4.627021000 |
| H  | 1.478671000  | 9.813425000  | 3.784326000 |
| C  | 1.036432000  | 10.674930000 | 5.682170000 |
| H  | 0.004498000  | 10.369309000 | 5.566694000 |
| C  | -0.228310000 | 14.171638000 | 4.780882000 |
| C  | -0.882772000 | 12.903109000 | 4.926230000 |
| C  | 0.278339000  | 14.266174000 | 3.452753000 |
| C  | -0.857255000 | 12.238332000 | 3.638679000 |
| C  | -0.180508000 | 13.092064000 | 2.728578000 |
| Br | 2.919350000  | 12.385620000 | 2.411741000 |
| C  | -1.680965000 | 12.472401000 | 6.101119000 |
| H  | -1.268526000 | 12.834251000 | 7.039241000 |
| H  | -2.691805000 | 12.874856000 | 6.020191000 |
| H  | -1.777238000 | 11.391814000 | 6.164732000 |
| C  | -1.552978000 | 10.973547000 | 3.294715000 |

|   |              |              |             |
|---|--------------|--------------|-------------|
| H | -1.585870000 | 10.277909000 | 4.130009000 |
| H | -2.586468000 | 11.179428000 | 3.013811000 |
| H | -1.082940000 | 10.471405000 | 2.453505000 |
| C | -0.074984000 | 12.878859000 | 1.268788000 |
| H | 0.098451000  | 11.836632000 | 1.015814000 |
| H | -1.020203000 | 13.177774000 | 0.810814000 |
| H | 0.719810000  | 13.466873000 | 0.823776000 |
| C | 0.981360000  | 15.423902000 | 2.848962000 |
| H | 1.715956000  | 15.095290000 | 2.117381000 |
| H | 0.273240000  | 16.079258000 | 2.340914000 |
| H | 1.498793000  | 16.017440000 | 3.598341000 |
| C | -0.169688000 | 15.226797000 | 5.817848000 |
| H | 0.667616000  | 15.904008000 | 5.673313000 |
| H | -1.078754000 | 15.827683000 | 5.763353000 |
| H | -0.121778000 | 14.819041000 | 6.825216000 |

63

structure of TS\_3\_IM9

|    |              |              |             |
|----|--------------|--------------|-------------|
| Ir | 1.697112000  | 12.771369000 | 4.613190000 |
| C  | 0.709648000  | 10.151014000 | 6.079193000 |
| H  | 1.464527000  | 9.435468000  | 6.403390000 |
| H  | -0.223335000 | 9.592065000  | 6.030611000 |
| C  | 0.577045000  | 11.284659000 | 7.088328000 |
| H  | -0.438375000 | 11.684941000 | 7.054858000 |
| H  | 0.707714000  | 10.919974000 | 8.111533000 |
| C  | 1.535633000  | 12.411987000 | 6.831630000 |
| H  | 1.245461000  | 13.359033000 | 7.269465000 |
| C  | 2.882168000  | 12.285309000 | 6.505382000 |
| H  | 3.494787000  | 13.160478000 | 6.671053000 |
| C  | 3.628137000  | 10.975584000 | 6.413635000 |
| H  | 3.247844000  | 10.306706000 | 7.186743000 |
| H  | 4.668296000  | 11.161978000 | 6.668957000 |
| C  | 3.571010000  | 10.296499000 | 5.038113000 |
| H  | 4.468478000  | 10.541054000 | 4.478312000 |
| H  | 3.567195000  | 9.208896000  | 5.153839000 |
| C  | 2.382332000  | 10.697697000 | 4.215097000 |
| H  | 2.523154000  | 10.644956000 | 3.141552000 |
| C  | 1.066763000  | 10.648186000 | 4.694789000 |
| H  | 0.289251000  | 10.551720000 | 3.948106000 |
| C  | 1.230269000  | 14.924290000 | 4.337676000 |
| C  | 0.094889000  | 14.268594000 | 4.915457000 |
| C  | 1.177843000  | 14.663776000 | 2.872636000 |
| C  | -0.323714000 | 13.247507000 | 3.999379000 |
| C  | 0.544092000  | 13.339964000 | 2.835727000 |

|    |              |              |              |
|----|--------------|--------------|--------------|
| Br | 4.196528000  | 13.296558000 | 3.948452000  |
| P  | -0.286496000 | 16.219071000 | 2.165050000  |
| O  | 0.464674000  | 17.605506000 | 2.119355000  |
| O  | -1.595270000 | 16.628261000 | 3.003821000  |
| O  | -0.788010000 | 15.824154000 | 0.710613000  |
| C  | -0.126022000 | 18.907842000 | 2.304146000  |
| H  | 0.647354000  | 19.626334000 | 2.058863000  |
| H  | -0.981734000 | 19.048270000 | 1.649186000  |
| H  | -0.435239000 | 19.030786000 | 3.338147000  |
| C  | -2.734394000 | 15.764988000 | 3.084568000  |
| H  | -2.716758000 | 15.221185000 | 4.026521000  |
| H  | -3.620470000 | 16.391270000 | 3.050020000  |
| H  | -2.761653000 | 15.058635000 | 2.254732000  |
| C  | -1.517559000 | 16.722183000 | -0.149310000 |
| H  | -0.862078000 | 17.518662000 | -0.493069000 |
| H  | -1.854602000 | 16.138236000 | -0.997782000 |
| H  | -2.377597000 | 17.142560000 | 0.369596000  |
| C  | 0.368177000  | 12.547414000 | 1.587481000  |
| H  | 1.297313000  | 12.482041000 | 1.025301000  |
| H  | 0.044299000  | 11.530390000 | 1.798531000  |
| H  | -0.380221000 | 12.997265000 | 0.929768000  |
| C  | -1.541551000 | 12.404138000 | 4.134381000  |
| H  | -1.723741000 | 12.106432000 | 5.164930000  |
| H  | -2.423605000 | 12.949120000 | 3.795690000  |
| H  | -1.485947000 | 11.503872000 | 3.528861000  |
| C  | -0.593178000 | 14.652286000 | 6.172205000  |
| H  | -1.072904000 | 13.808340000 | 6.663408000  |
| H  | 0.077764000  | 15.129684000 | 6.881257000  |
| H  | -1.373019000 | 15.382592000 | 5.947046000  |
| C  | 1.972638000  | 16.059253000 | 4.947062000  |
| H  | 2.020470000  | 15.968495000 | 6.029994000  |
| H  | 2.995614000  | 16.094426000 | 4.577947000  |
| H  | 1.499465000  | 17.017846000 | 4.717366000  |
| C  | 2.256599000  | 15.031901000 | 1.900426000  |
| H  | 3.089661000  | 14.338175000 | 1.989441000  |
| H  | 1.884515000  | 14.984205000 | 0.878731000  |
| H  | 2.640691000  | 16.031831000 | 2.084296000  |

63

structure of IM9

|    |              |              |             |
|----|--------------|--------------|-------------|
| Ir | 1.627440000  | 12.836868000 | 4.572215000 |
| C  | 0.685788000  | 10.198982000 | 6.044879000 |
| H  | 1.447862000  | 9.484099000  | 6.353857000 |
| H  | -0.244832000 | 9.635044000  | 6.004069000 |



|    |              |              |              |
|----|--------------|--------------|--------------|
| C  | 0.559114000  | 11.321459000 | 7.067686000  |
| H  | -0.459141000 | 11.715883000 | 7.048627000  |
| H  | 0.700790000  | 10.943579000 | 8.084871000  |
| C  | 1.508909000  | 12.458113000 | 6.816554000  |
| H  | 1.213048000  | 13.400364000 | 7.260514000  |
| C  | 2.847135000  | 12.345512000 | 6.472065000  |
| H  | 3.455236000  | 13.226033000 | 6.624006000  |
| C  | 3.602136000  | 11.043487000 | 6.354213000  |
| H  | 3.232705000  | 10.358259000 | 7.118300000  |
| H  | 4.642714000  | 11.233584000 | 6.605781000  |
| C  | 3.540829000  | 10.387771000 | 4.968534000  |
| H  | 4.425312000  | 10.662417000 | 4.401757000  |
| H  | 3.562056000  | 9.298168000  | 5.064301000  |
| C  | 2.334135000  | 10.780132000 | 4.167171000  |
| H  | 2.461363000  | 10.733064000 | 3.091287000  |
| C  | 1.023111000  | 10.708046000 | 4.659100000  |
| H  | 0.242572000  | 10.592739000 | 3.918319000  |
| C  | 1.179885000  | 14.982293000 | 4.306946000  |
| C  | 0.045824000  | 14.328648000 | 4.894580000  |
| C  | 1.031082000  | 14.843991000 | 2.783155000  |
| C  | -0.380528000 | 13.311732000 | 3.976246000  |
| C  | 0.494652000  | 13.414871000 | 2.814729000  |
| Br | 4.143908000  | 13.424237000 | 3.913354000  |
| P  | -0.177789000 | 16.100425000 | 2.220637000  |
| O  | 0.556049000  | 17.473069000 | 2.163583000  |
| O  | -1.414772000 | 16.393407000 | 3.146184000  |
| O  | -0.692200000 | 15.645232000 | 0.813262000  |
| C  | -0.022459000 | 18.768603000 | 2.437347000  |
| H  | 0.773671000  | 19.486262000 | 2.281613000  |
| H  | -0.844628000 | 18.974714000 | 1.757629000  |
| H  | -0.369789000 | 18.809074000 | 3.465073000  |
| C  | -2.643467000 | 15.644208000 | 3.135071000  |
| H  | -2.761205000 | 15.166861000 | 4.102559000  |
| H  | -3.455416000 | 16.346298000 | 2.972072000  |
| H  | -2.640790000 | 14.892112000 | 2.348342000  |
| C  | -1.413709000 | 16.512521000 | -0.088174000 |
| H  | -0.747260000 | 17.283313000 | -0.466093000 |
| H  | -1.753817000 | 15.889338000 | -0.906175000 |
| H  | -2.270187000 | 16.963449000 | 0.409559000  |
| C  | 0.321422000  | 12.600241000 | 1.576957000  |
| H  | 1.225999000  | 12.605343000 | 0.971908000  |
| H  | 0.103940000  | 11.561060000 | 1.816703000  |
| H  | -0.494640000 | 12.963086000 | 0.946170000  |

|   |              |              |             |
|---|--------------|--------------|-------------|
| C | -1.580261000 | 12.442159000 | 4.126251000 |
| H | -1.739543000 | 12.138962000 | 5.159167000 |
| H | -2.484601000 | 12.955949000 | 3.798837000 |
| H | -1.506734000 | 11.542555000 | 3.521612000 |
| C | -0.624443000 | 14.700924000 | 6.165052000 |
| H | -1.099846000 | 13.852931000 | 6.653796000 |
| H | 0.059016000  | 15.166221000 | 6.870258000 |
| H | -1.402711000 | 15.439777000 | 5.961711000 |
| C | 1.938436000  | 16.093340000 | 4.944504000 |
| H | 2.052100000  | 15.929466000 | 6.014124000 |
| H | 2.940043000  | 16.166288000 | 4.524855000 |
| H | 1.444094000  | 17.060648000 | 4.813323000 |
| C | 2.221480000  | 15.076584000 | 1.854510000 |
| H | 2.888239000  | 14.223521000 | 1.892666000 |
| H | 1.892258000  | 15.204697000 | 0.823436000 |
| H | 2.792354000  | 15.955824000 | 2.140221000 |

63

structure of TS\_IM9\_IM10

|    |              |              |              |
|----|--------------|--------------|--------------|
| Ir | 1.428953000  | -0.921688000 | 0.928767000  |
| C  | 0.270213000  | -3.589319000 | 2.049576000  |
| H  | 0.966158000  | -4.376234000 | 2.341222000  |
| H  | -0.673147000 | -4.096554000 | 1.854168000  |
| C  | 0.098883000  | -2.561928000 | 3.162072000  |
| H  | -0.935916000 | -2.217483000 | 3.188337000  |
| H  | 0.285303000  | -2.991169000 | 4.150980000  |
| C  | 0.989464000  | -1.366468000 | 2.941383000  |
| H  | 0.666088000  | -0.470388000 | 3.461204000  |
| C  | 2.404766000  | -1.482310000 | 2.712533000  |
| H  | 3.004943000  | -0.624713000 | 2.993999000  |
| C  | 3.141333000  | -2.807219000 | 2.733238000  |
| H  | 2.608253000  | -3.507294000 | 3.377696000  |
| H  | 4.118983000  | -2.666845000 | 3.187971000  |
| C  | 3.283517000  | -3.343240000 | 1.317648000  |
| H  | 4.217297000  | -2.985483000 | 0.887712000  |
| H  | 3.328855000  | -4.435301000 | 1.289114000  |
| C  | 2.163508000  | -2.833882000 | 0.452742000  |
| H  | 2.399394000  | -2.812005000 | -0.607963000 |
| C  | 0.764796000  | -2.922574000 | 0.778612000  |
| H  | 0.092085000  | -2.995582000 | -0.072945000 |
| C  | 0.417077000  | 1.002003000  | 0.171216000  |
| C  | -0.569213000 | 0.210138000  | 0.820909000  |
| C  | 0.187728000  | 0.843489000  | -1.344174000 |
| C  | -1.245437000 | -0.613225000 | -0.188152000 |

|                   |              |              |              |
|-------------------|--------------|--------------|--------------|
| C                 | -0.788033000 | -0.327184000 | -1.430019000 |
| Br                | 3.650603000  | 0.107468000  | 0.113370000  |
| P                 | -0.790546000 | 2.283495000  | -1.830871000 |
| O                 | 0.097131000  | 3.555381000  | -1.834877000 |
| O                 | -1.983177000 | 2.619875000  | -0.874665000 |
| O                 | -1.337256000 | 2.003205000  | -3.271051000 |
| C                 | -0.236804000 | 4.893157000  | -1.406690000 |
| H                 | 0.638167000  | 5.283561000  | -0.899616000 |
| H                 | -0.457493000 | 5.495319000  | -2.282830000 |
| H                 | -1.086355000 | 4.878049000  | -0.731094000 |
| C                 | -3.258016000 | 1.941597000  | -0.896887000 |
| H                 | -3.351188000 | 1.360536000  | 0.014619000  |
| H                 | -4.028120000 | 2.705823000  | -0.932275000 |
| H                 | -3.337457000 | 1.284144000  | -1.759885000 |
| C                 | -1.935799000 | 3.044235000  | -4.073898000 |
| H                 | -1.166205000 | 3.731350000  | -4.414857000 |
| H                 | -2.391307000 | 2.551319000  | -4.924029000 |
| H                 | -2.697486000 | 3.579248000  | -3.509095000 |
| C                 | -1.056555000 | -1.053992000 | -2.696432000 |
| H                 | -0.133099000 | -1.440643000 | -3.131806000 |
| H                 | -1.715401000 | -1.902167000 | -2.532097000 |
| H                 | -1.512744000 | -0.426637000 | -3.461963000 |
| C                 | -2.264780000 | -1.623945000 | 0.189873000  |
| H                 | -1.930715000 | -2.222921000 | 1.036564000  |
| H                 | -3.192111000 | -1.142623000 | 0.507771000  |
| H                 | -2.512611000 | -2.297550000 | -0.625723000 |
| C                 | -1.235897000 | 0.588499000  | 2.102498000  |
| H                 | -1.647765000 | -0.266123000 | 2.635029000  |
| H                 | -0.565474000 | 1.113259000  | 2.777632000  |
| H                 | -2.065562000 | 1.272809000  | 1.902708000  |
| C                 | 0.992308000  | 2.258857000  | 0.755842000  |
| H                 | 1.301802000  | 2.102869000  | 1.786859000  |
| H                 | 1.879363000  | 2.579814000  | 0.213529000  |
| H                 | 0.270962000  | 3.082741000  | 0.769437000  |
| C                 | 1.379147000  | 0.764426000  | -2.294216000 |
| H                 | 1.896561000  | -0.178788000 | -2.136677000 |
| H                 | 1.059734000  | 0.809883000  | -3.334424000 |
| H                 | 2.098291000  | 1.556923000  | -2.107616000 |
| 63                |              |              |              |
| structure of IM10 |              |              |              |
| Ir                | 0.487107000  | 12.447899000 | 5.670702000  |
| C                 | 2.741923000  | 10.793134000 | 6.858247000  |
| H                 | 3.341974000  | 10.184521000 | 6.182450000  |

|    |              |              |             |
|----|--------------|--------------|-------------|
| H  | 2.875804000  | 10.355750000 | 7.845177000 |
| C  | 3.225930000  | 12.243358000 | 6.865097000 |
| H  | 3.068226000  | 12.670453000 | 7.856720000 |
| H  | 4.303685000  | 12.297125000 | 6.686836000 |
| C  | 2.475621000  | 13.096454000 | 5.874398000 |
| H  | 2.493240000  | 14.159438000 | 6.107698000 |
| C  | 2.248210000  | 12.746912000 | 4.515972000 |
| H  | 2.098565000  | 13.567521000 | 3.821432000 |
| C  | 2.783057000  | 11.477915000 | 3.884081000 |
| H  | 3.697927000  | 11.171143000 | 4.389758000 |
| H  | 3.072320000  | 11.675125000 | 2.853630000 |
| C  | 1.736441000  | 10.364909000 | 3.921826000 |
| H  | 1.111965000  | 10.417756000 | 3.030308000 |
| H  | 2.203945000  | 9.375973000  | 3.897188000 |
| C  | 0.837542000  | 10.475349000 | 5.117809000 |
| H  | -0.118721000 | 9.971579000  | 5.014481000 |
| C  | 1.282971000  | 10.698277000 | 6.462686000 |
| H  | 0.612530000  | 10.343831000 | 7.239155000 |
| C  | -0.937852000 | 15.208870000 | 5.427716000 |
| C  | 0.020829000  | 15.376537000 | 4.475695000 |
| Br | -1.787352000 | 11.830021000 | 6.470931000 |
| C  | 1.171098000  | 16.083417000 | 5.038870000 |
| C  | 0.951502000  | 16.357963000 | 6.345830000 |
| C  | -0.429326000 | 15.839979000 | 6.714594000 |
| P  | -1.460096000 | 17.281747000 | 6.971638000 |
| O  | -0.794534000 | 18.111347000 | 8.114965000 |
| O  | -1.674753000 | 18.166040000 | 5.703785000 |
| O  | -2.882209000 | 16.848111000 | 7.402469000 |
| C  | -1.477682000 | 19.214173000 | 8.753688000 |
| C  | -0.663737000 | 18.999233000 | 5.093180000 |
| C  | -4.161008000 | 17.333645000 | 6.937002000 |
| H  | -0.751327000 | 19.685998000 | 9.403695000 |
| H  | -2.310874000 | 18.838233000 | 9.341043000 |
| H  | -1.827487000 | 19.929313000 | 8.011590000 |
| H  | -0.287412000 | 18.494351000 | 4.209197000 |
| H  | 0.153313000  | 19.192357000 | 5.784807000 |
| H  | -1.149959000 | 19.928644000 | 4.816536000 |
| H  | -4.073022000 | 17.741421000 | 5.935327000 |
| H  | -4.519543000 | 18.092624000 | 7.625910000 |
| H  | -4.830523000 | 16.481469000 | 6.938994000 |
| C  | 2.381794000  | 16.408093000 | 4.243528000 |
| H  | 2.901338000  | 15.507242000 | 3.915824000 |
| H  | 2.118960000  | 16.954454000 | 3.336518000 |

|   |              |              |             |
|---|--------------|--------------|-------------|
| H | 3.092293000  | 17.012136000 | 4.799847000 |
| C | 1.923282000  | 16.869346000 | 7.344597000 |
| H | 1.590694000  | 17.772656000 | 7.853706000 |
| H | 2.103793000  | 16.127967000 | 8.126261000 |
| H | 2.882764000  | 17.083157000 | 6.882430000 |
| C | -0.462200000 | 14.943097000 | 7.956052000 |
| H | -1.440646000 | 14.490606000 | 8.097132000 |
| H | 0.248848000  | 14.126541000 | 7.808961000 |
| H | -0.178650000 | 15.487030000 | 8.855303000 |
| C | -0.115420000 | 15.045903000 | 3.033794000 |
| H | 0.828020000  | 14.731331000 | 2.592724000 |
| H | -0.847600000 | 14.261009000 | 2.863627000 |
| H | -0.443446000 | 15.922859000 | 2.470165000 |
| C | -2.355862000 | 14.827120000 | 5.190712000 |
| H | -2.843602000 | 14.452107000 | 6.085804000 |
| H | -2.928713000 | 15.680043000 | 4.811229000 |
| H | -2.431160000 | 14.039209000 | 4.445964000 |

22

structure of IM11

|    |              |              |             |
|----|--------------|--------------|-------------|
| Ir | 0.478110000  | 12.391262000 | 5.698383000 |
| C  | 2.769915000  | 10.776792000 | 6.855886000 |
| H  | 3.362540000  | 10.172313000 | 6.168612000 |
| H  | 2.921546000  | 10.338107000 | 7.840256000 |
| C  | 3.243978000  | 12.231663000 | 6.856105000 |
| H  | 3.118066000  | 12.650403000 | 7.854207000 |
| H  | 4.314578000  | 12.293142000 | 6.638839000 |
| C  | 2.447836000  | 13.080766000 | 5.896488000 |
| H  | 2.424237000  | 14.139951000 | 6.147204000 |
| C  | 2.211231000  | 12.743229000 | 4.535998000 |
| H  | 2.015261000  | 13.567894000 | 3.855900000 |
| C  | 2.771991000  | 11.493288000 | 3.888281000 |
| H  | 3.700826000  | 11.205912000 | 4.381279000 |
| H  | 3.042927000  | 11.704136000 | 2.855332000 |
| C  | 1.754632000  | 10.350972000 | 3.933687000 |
| H  | 1.128273000  | 10.383833000 | 3.042389000 |
| H  | 2.248992000  | 9.374375000  | 3.914110000 |
| C  | 0.848836000  | 10.450869000 | 5.129379000 |
| H  | -0.092704000 | 9.918518000  | 5.024296000 |
| C  | 1.303742000  | 10.675359000 | 6.479941000 |
| H  | 0.652953000  | 10.301142000 | 7.265093000 |
| Br | -1.874856000 | 12.120516000 | 6.304916000 |

41

structure of IM12

|   |              |              |             |
|---|--------------|--------------|-------------|
| C | -0.968389000 | 15.266780000 | 5.371334000 |
| C | -0.018082000 | 15.446440000 | 4.428729000 |
| C | 1.142409000  | 16.123919000 | 5.009043000 |
| C | 0.925825000  | 16.384790000 | 6.317762000 |
| C | -0.458583000 | 15.864010000 | 6.670153000 |
| P | -1.485652000 | 17.294445000 | 6.968452000 |
| O | -0.843922000 | 18.061226000 | 8.168616000 |
| O | -1.681634000 | 18.248520000 | 5.750242000 |
| O | -2.926341000 | 16.833766000 | 7.326244000 |
| C | -1.492493000 | 19.174759000 | 8.821317000 |
| C | -0.648335000 | 19.070953000 | 5.163010000 |
| C | -4.160365000 | 17.472516000 | 6.927355000 |
| H | -0.765612000 | 19.590961000 | 9.507892000 |
| H | -2.360143000 | 18.822944000 | 9.373071000 |
| H | -1.784136000 | 19.928997000 | 8.092981000 |
| H | -0.274106000 | 18.573945000 | 4.273794000 |
| H | 0.164969000  | 19.237158000 | 5.865841000 |
| H | -1.114485000 | 20.014020000 | 4.898791000 |
| H | -4.196849000 | 17.572227000 | 5.847148000 |
| H | -4.249266000 | 18.448663000 | 7.395750000 |
| H | -4.954782000 | 16.822360000 | 7.272762000 |
| C | 2.362548000  | 16.422844000 | 4.219838000 |
| H | 2.782231000  | 15.517335000 | 3.782029000 |
| H | 2.137149000  | 17.084541000 | 3.381818000 |
| H | 3.138132000  | 16.896626000 | 4.813613000 |
| C | 1.870475000  | 16.958463000 | 7.310386000 |
| H | 1.626162000  | 17.979542000 | 7.606313000 |
| H | 1.891879000  | 16.374245000 | 8.230687000 |
| H | 2.882400000  | 16.973332000 | 6.915745000 |
| C | -0.490445000 | 14.912197000 | 7.868221000 |
| H | -1.494916000 | 14.546519000 | 8.066746000 |
| H | 0.145870000  | 14.059511000 | 7.644503000 |
| H | -0.116359000 | 15.389165000 | 8.770914000 |
| C | -0.064390000 | 15.017303000 | 3.009294000 |
| H | 0.777956000  | 14.371508000 | 2.762261000 |
| H | -0.977942000 | 14.482976000 | 2.767510000 |
| H | 0.002736000  | 15.873265000 | 2.336210000 |
| C | -2.287524000 | 14.598145000 | 5.236728000 |
| H | -2.543324000 | 14.015681000 | 6.121111000 |
| H | -3.108565000 | 15.300992000 | 5.078589000 |
| H | -2.294214000 | 13.919787000 | 4.387905000 |

47

structure of TS\_3\_IM13

|    |              |              |              |
|----|--------------|--------------|--------------|
| Ir | -0.928621000 | 0.359926000  | -1.195261000 |
| C  | -2.497388000 | 0.792810000  | -2.587099000 |
| C  | -2.278755000 | 1.940348000  | -1.771332000 |
| C  | -2.887752000 | -0.312707000 | -1.717922000 |
| C  | -2.532580000 | 1.546561000  | -0.395852000 |
| C  | -2.980919000 | 0.184390000  | -0.380573000 |
| Br | 0.967125000  | 1.188821000  | -2.490777000 |
| C  | 0.516999000  | -1.356809000 | -0.478514000 |
| C  | -0.324924000 | -1.006678000 | 0.566654000  |
| H  | 0.076882000  | -2.073365000 | -1.168957000 |
| C  | 2.017848000  | -1.317409000 | -0.535027000 |
| C  | 0.013396000  | -0.233474000 | 1.808563000  |
| H  | -1.234598000 | -1.588915000 | 0.646596000  |
| H  | 2.383234000  | -0.478777000 | -1.125344000 |
| H  | 2.300797000  | -2.199004000 | -1.110228000 |
| C  | 2.751543000  | -1.353209000 | 0.813906000  |
| C  | 0.809522000  | 1.064972000  | 1.657923000  |
| H  | 0.521373000  | -0.899822000 | 2.510486000  |
| H  | -0.931833000 | 0.006076000  | 2.298364000  |
| H  | 2.187091000  | -1.953779000 | 1.529809000  |
| H  | 3.675170000  | -1.906146000 | 0.659803000  |
| C  | 3.106838000  | -0.008243000 | 1.375260000  |
| H  | 0.488363000  | 1.588229000  | 0.743021000  |
| H  | 0.495410000  | 1.731557000  | 2.462690000  |
| C  | 2.299629000  | 1.000200000  | 1.686791000  |
| H  | 4.167527000  | 0.174689000  | 1.494119000  |
| H  | 2.770301000  | 1.920324000  | 2.011580000  |
| C  | -3.232395000 | -1.678211000 | -2.175112000 |
| H  | -3.073771000 | -2.419700000 | -1.396121000 |
| H  | -4.285105000 | -1.723245000 | -2.458911000 |
| H  | -2.651256000 | -1.968913000 | -3.046244000 |
| C  | -3.510732000 | -0.543862000 | 0.795979000  |
| H  | -2.994580000 | -0.280011000 | 1.716098000  |
| H  | -4.561127000 | -0.285886000 | 0.935617000  |
| H  | -3.462815000 | -1.622286000 | 0.672107000  |
| C  | -2.452917000 | 2.447768000  | 0.775074000  |
| H  | -1.669930000 | 3.192545000  | 0.660290000  |
| H  | -3.396384000 | 2.985277000  | 0.887003000  |
| H  | -2.278283000 | 1.902310000  | 1.698824000  |
| C  | -1.900014000 | 3.300170000  | -2.220026000 |
| H  | -1.402524000 | 3.281429000  | -3.184777000 |
| H  | -2.790031000 | 3.923485000  | -2.310717000 |
| H  | -1.229702000 | 3.782853000  | -1.513262000 |

|   |              |              |              |
|---|--------------|--------------|--------------|
| C | -2.369011000 | 0.710593000  | -4.059607000 |
| H | -3.354587000 | 0.809407000  | -4.516955000 |
| H | -1.733114000 | 1.496540000  | -4.454426000 |
| H | -1.958520000 | -0.244907000 | -4.376006000 |

47

structure of IM13

|    |              |              |             |
|----|--------------|--------------|-------------|
| Ir | 0.934363000  | 12.640348000 | 4.361034000 |
| C  | 1.464119000  | 14.739731000 | 4.311947000 |
| C  | 0.111449000  | 14.613328000 | 4.717054000 |
| C  | 1.590694000  | 14.126219000 | 2.992053000 |
| C  | -0.609776000 | 13.920026000 | 3.653197000 |
| C  | 0.293785000  | 13.685884000 | 2.565386000 |
| Br | 1.686679000  | 11.897047000 | 6.548570000 |
| C  | 1.480595000  | 10.666165000 | 3.231862000 |
| C  | 0.190161000  | 10.495266000 | 3.697398000 |
| H  | 1.552328000  | 11.070014000 | 2.225295000 |
| C  | 2.750542000  | 10.037779000 | 3.718058000 |
| C  | -0.330462000 | 9.608212000  | 4.790451000 |
| H  | -0.582891000 | 10.845390000 | 3.019985000 |
| H  | 2.766368000  | 9.938522000  | 4.795808000 |
| H  | 3.583306000  | 10.695226000 | 3.463858000 |
| C  | 2.977521000  | 8.682422000  | 3.042082000 |
| C  | 0.604676000  | 8.509473000  | 5.292783000 |
| H  | -1.229995000 | 9.142444000  | 4.378878000 |
| H  | -0.691324000 | 10.207419000 | 5.628633000 |
| H  | 3.056206000  | 8.829280000  | 1.961481000 |
| H  | 3.964186000  | 8.316667000  | 3.338702000 |
| C  | 1.958417000  | 7.621001000  | 3.297721000 |
| H  | 1.463225000  | 8.946356000  | 5.795227000 |
| H  | 0.069303000  | 7.966442000  | 6.070070000 |
| C  | 0.995523000  | 7.539807000  | 4.213350000 |
| H  | 2.044144000  | 6.777501000  | 2.621746000 |
| H  | 0.382292000  | 6.646824000  | 4.172803000 |
| C  | -2.058271000 | 13.612709000 | 3.672144000 |
| H  | -2.396170000 | 13.318812000 | 4.662970000 |
| H  | -2.629357000 | 14.497780000 | 3.386834000 |
| H  | -2.316358000 | 12.822089000 | 2.973105000 |
| C  | -0.056325000 | 13.117849000 | 1.240127000 |
| H  | -0.435685000 | 13.903275000 | 0.586141000 |
| H  | 0.803397000  | 12.677558000 | 0.742233000 |
| H  | -0.833543000 | 12.360059000 | 1.307658000 |
| C  | 2.842809000  | 14.067297000 | 2.203701000 |
| H  | 2.989879000  | 15.006034000 | 1.667127000 |



|   |              |              |             |
|---|--------------|--------------|-------------|
| H | 3.712342000  | 13.920943000 | 2.839709000 |
| H | 2.821925000  | 13.271435000 | 1.464065000 |
| C | 2.566915000  | 15.376868000 | 5.066762000 |
| H | 2.709367000  | 16.401207000 | 4.719925000 |
| H | 2.361426000  | 15.410929000 | 6.132172000 |
| H | 3.507916000  | 14.851981000 | 4.923355000 |
| C | -0.488196000 | 15.085418000 | 5.985559000 |
| H | 0.256624000  | 15.206182000 | 6.766020000 |
| H | -0.969215000 | 16.051973000 | 5.829108000 |
| H | -1.249447000 | 14.400416000 | 6.350122000 |

63

structure of IM14

|    |              |              |             |
|----|--------------|--------------|-------------|
| Ir | 0.978164000  | 12.566173000 | 4.588067000 |
| C  | 1.973510000  | 14.409841000 | 3.825819000 |
| C  | 0.728038000  | 14.748157000 | 4.440109000 |
| C  | 1.702001000  | 13.522354000 | 2.734850000 |
| C  | -0.336713000 | 14.152949000 | 3.645488000 |
| C  | 0.257789000  | 13.400717000 | 2.610195000 |
| Br | -0.676982000 | 12.483346000 | 6.566906000 |
| C  | 1.414914000  | 10.577897000 | 3.547441000 |
| C  | 0.229509000  | 10.408728000 | 4.268879000 |
| H  | 1.280758000  | 10.893804000 | 2.519274000 |
| C  | 2.713687000  | 9.857845000  | 3.742298000 |
| C  | -0.006597000 | 9.449482000  | 5.409803000 |
| H  | -0.671314000 | 10.664967000 | 3.721178000 |
| H  | 2.888869000  | 9.627910000  | 4.788148000 |
| H  | 3.536870000  | 10.503242000 | 3.435706000 |
| C  | 2.749823000  | 8.593192000  | 2.873515000 |
| C  | 0.784836000  | 8.134006000  | 5.343535000 |
| H  | -1.072338000 | 9.223651000  | 5.407946000 |
| H  | 0.175957000  | 9.920593000  | 6.371789000 |
| H  | 2.828896000  | 8.903853000  | 1.828484000 |
| H  | 3.685672000  | 8.062326000  | 3.069955000 |
| C  | 1.590951000  | 7.649825000  | 2.985144000 |
| H  | 1.808657000  | 8.299117000  | 5.673834000 |
| H  | 0.350775000  | 7.466083000  | 6.087000000 |
| C  | 0.761106000  | 7.458016000  | 4.007594000 |
| H  | 1.427005000  | 7.044240000  | 2.101294000 |
| H  | -0.030359000 | 6.731203000  | 3.864352000 |
| C  | -1.784573000 | 14.364128000 | 3.869745000 |
| H  | -2.014782000 | 14.465536000 | 4.926868000 |
| H  | -2.103064000 | 15.279067000 | 3.368090000 |
| H  | -2.382233000 | 13.546767000 | 3.475252000 |

|   |              |              |             |
|---|--------------|--------------|-------------|
| C | -0.459182000 | 12.689092000 | 1.523254000 |
| H | -0.537974000 | 13.334037000 | 0.647404000 |
| H | 0.055953000  | 11.787343000 | 1.199537000 |
| H | -1.469548000 | 12.415085000 | 1.813999000 |
| C | 2.707096000  | 13.029000000 | 1.759677000 |
| H | 2.901213000  | 13.792167000 | 1.004907000 |
| H | 3.655223000  | 12.796911000 | 2.239318000 |
| H | 2.370263000  | 12.140593000 | 1.231140000 |
| C | 3.304092000  | 14.944986000 | 4.204658000 |
| H | 3.446035000  | 15.921734000 | 3.740681000 |
| H | 3.397927000  | 15.080766000 | 5.279874000 |
| H | 4.110896000  | 14.301328000 | 3.867373000 |
| C | 0.531210000  | 15.703932000 | 5.557577000 |
| H | 1.427092000  | 15.795423000 | 6.166859000 |
| H | 0.294840000  | 16.695471000 | 5.169619000 |
| H | -0.288872000 | 15.394954000 | 6.202175000 |
| P | 2.578408000  | 12.155416000 | 6.125795000 |
| O | 2.873760000  | 13.275937000 | 7.226560000 |
| O | 4.016715000  | 12.111841000 | 5.442395000 |
| O | 2.362612000  | 10.807077000 | 6.938730000 |
| C | 2.065621000  | 13.497050000 | 8.393285000 |
| C | 5.245786000  | 12.466981000 | 6.095431000 |
| C | 3.337125000  | 10.255484000 | 7.831979000 |
| H | 1.264940000  | 14.195352000 | 8.167724000 |
| H | 1.627613000  | 12.567491000 | 8.749322000 |
| H | 2.725568000  | 13.913717000 | 9.148171000 |
| H | 6.044683000  | 12.135821000 | 5.440387000 |
| H | 5.301480000  | 13.543757000 | 6.232419000 |
| H | 5.345329000  | 11.980966000 | 7.062328000 |
| H | 3.711908000  | 11.008556000 | 8.524151000 |
| H | 2.839234000  | 9.470332000  | 8.391103000 |
| H | 4.163722000  | 9.827417000  | 7.266345000 |

20

structure of COD

|   |              |              |             |
|---|--------------|--------------|-------------|
| C | 1.402632000  | 10.631816000 | 3.185624000 |
| C | 0.170422000  | 10.437232000 | 3.649778000 |
| H | 1.491883000  | 11.306680000 | 2.340759000 |
| C | 2.696318000  | 10.022829000 | 3.640253000 |
| C | -0.322215000 | 9.570981000  | 4.762639000 |
| H | -0.619126000 | 10.990859000 | 3.151709000 |
| H | 2.755997000  | 9.975846000  | 4.724411000 |
| H | 3.512626000  | 10.679233000 | 3.337756000 |
| C | 2.963341000  | 8.641653000  | 3.039715000 |

|   |              |              |             |
|---|--------------|--------------|-------------|
| C | 0.625904000  | 8.495861000  | 5.296888000 |
| H | -1.241587000 | 9.085736000  | 4.422410000 |
| H | -0.643610000 | 10.209280000 | 5.592344000 |
| H | 3.023455000  | 8.741157000  | 1.952053000 |
| H | 3.963270000  | 8.308753000  | 3.337117000 |
| C | 1.983303000  | 7.555076000  | 3.340915000 |
| H | 1.493722000  | 8.959987000  | 5.757999000 |
| H | 0.114963000  | 7.977234000  | 6.108485000 |
| C | 1.026445000  | 7.484441000  | 4.263554000 |
| H | 2.084253000  | 6.690701000  | 2.692362000 |
| H | 0.428343000  | 6.579195000  | 4.260086000 |

43

structure of IM15

|    |              |              |             |
|----|--------------|--------------|-------------|
| Ir | 0.991523000  | 12.948447000 | 4.791162000 |
| C  | 2.024678000  | 14.559795000 | 3.755452000 |
| C  | 0.774993000  | 15.006720000 | 4.313627000 |
| C  | 1.722137000  | 13.498036000 | 2.849874000 |
| C  | -0.315895000 | 14.312913000 | 3.639552000 |
| C  | 0.265408000  | 13.380208000 | 2.756023000 |
| Br | -0.626372000 | 11.571021000 | 5.963241000 |
| C  | -1.759284000 | 14.547534000 | 3.879961000 |
| H  | -1.960884000 | 14.774809000 | 4.923754000 |
| H  | -2.107527000 | 15.394093000 | 3.287649000 |
| H  | -2.359166000 | 13.683683000 | 3.609640000 |
| C  | -0.442761000 | 12.410372000 | 1.891561000 |
| H  | -0.482442000 | 12.786215000 | 0.868053000 |
| H  | 0.070292000  | 11.452084000 | 1.860110000 |
| H  | -1.462142000 | 12.238544000 | 2.223124000 |
| C  | 2.693205000  | 12.730428000 | 2.036296000 |
| H  | 2.826977000  | 13.205199000 | 1.062951000 |
| H  | 3.666175000  | 12.680275000 | 2.517121000 |
| H  | 2.352529000  | 11.714333000 | 1.855567000 |
| C  | 3.356943000  | 15.146610000 | 4.040412000 |
| H  | 3.494836000  | 16.048590000 | 3.443456000 |
| H  | 3.460029000  | 15.432231000 | 5.085272000 |
| H  | 4.161771000  | 14.460430000 | 3.797742000 |
| C  | 0.613285000  | 16.079506000 | 5.320051000 |
| H  | 1.478119000  | 16.150380000 | 5.975129000 |
| H  | 0.501995000  | 17.044105000 | 4.821002000 |
| H  | -0.271947000 | 15.928221000 | 5.932376000 |
| P  | 2.700474000  | 12.279267000 | 6.164219000 |
| O  | 2.881759000  | 13.087010000 | 7.534260000 |
| O  | 4.127563000  | 12.518814000 | 5.516405000 |

|   |             |              |             |
|---|-------------|--------------|-------------|
| O | 2.583140000 | 10.749665000 | 6.548645000 |
| C | 1.811207000 | 13.123426000 | 8.491422000 |
| C | 5.320813000 | 12.852610000 | 6.246093000 |
| C | 3.581706000 | 10.052199000 | 7.307796000 |
| H | 0.942597000 | 13.632723000 | 8.074755000 |
| H | 1.523369000 | 12.117207000 | 8.790624000 |
| H | 2.182968000 | 13.671484000 | 9.349544000 |
| H | 6.125937000 | 12.864402000 | 5.519531000 |
| H | 5.220631000 | 13.831693000 | 6.706613000 |
| H | 5.536094000 | 12.114912000 | 7.014712000 |
| H | 3.852849000 | 10.610331000 | 8.202923000 |
| H | 3.146871000 | 9.100998000  | 7.592687000 |
| H | 4.463605000 | 9.877621000  | 6.694978000 |

59

structure of 4

|    |              |              |             |
|----|--------------|--------------|-------------|
| Ir | 0.994304000  | 12.792091000 | 4.709340000 |
| C  | 1.886743000  | 14.759495000 | 4.088940000 |
| C  | 0.582168000  | 15.008172000 | 4.586967000 |
| C  | 1.773077000  | 13.850628000 | 2.966255000 |
| C  | -0.367488000 | 14.289105000 | 3.754851000 |
| C  | 0.365993000  | 13.632679000 | 2.729677000 |
| Br | -0.477866000 | 12.492729000 | 6.811122000 |
| C  | -1.841162000 | 14.339586000 | 3.917168000 |
| H  | -2.120139000 | 14.313159000 | 4.968595000 |
| H  | -2.243732000 | 15.258447000 | 3.489505000 |
| H  | -2.327603000 | 13.500669000 | 3.426976000 |
| C  | -0.195818000 | 12.903475000 | 1.565838000 |
| H  | -0.153124000 | 13.546703000 | 0.686247000 |
| H  | 0.367702000  | 12.002181000 | 1.333482000 |
| H  | -1.233548000 | 12.627559000 | 1.723310000 |
| C  | 2.875184000  | 13.457556000 | 2.051456000 |
| H  | 3.048159000  | 14.236167000 | 1.306825000 |
| H  | 3.805833000  | 13.301406000 | 2.590027000 |
| H  | 2.639986000  | 12.542722000 | 1.512452000 |
| C  | 3.154051000  | 15.375268000 | 4.558721000 |
| H  | 3.392975000  | 16.240493000 | 3.939427000 |
| H  | 3.087185000  | 15.720452000 | 5.586906000 |
| H  | 3.990451000  | 14.684374000 | 4.484375000 |
| C  | 0.194333000  | 15.910825000 | 5.698066000 |
| H  | 1.058046000  | 16.307952000 | 6.223935000 |
| H  | -0.368707000 | 16.758466000 | 5.306875000 |
| H  | -0.445561000 | 15.402168000 | 6.419157000 |
| P  | 2.838393000  | 12.091460000 | 5.836934000 |

|   |              |              |             |
|---|--------------|--------------|-------------|
| O | 3.346398000  | 12.990174000 | 7.055559000 |
| O | 4.091635000  | 12.131413000 | 4.856043000 |
| O | 2.979932000  | 10.608305000 | 6.399009000 |
| C | 2.563585000  | 13.885982000 | 7.844823000 |
| C | 5.423713000  | 11.890244000 | 5.344506000 |
| C | 2.402555000  | 10.220484000 | 7.654482000 |
| H | 1.794319000  | 14.367877000 | 7.243734000 |
| H | 2.080601000  | 13.350179000 | 8.658403000 |
| H | 3.247295000  | 14.629098000 | 8.244249000 |
| H | 6.067311000  | 11.846540000 | 4.472803000 |
| H | 5.737349000  | 12.702583000 | 5.995746000 |
| H | 5.467867000  | 10.947171000 | 5.883431000 |
| H | 2.915853000  | 10.725598000 | 8.470529000 |
| H | 1.338320000  | 10.447056000 | 7.681223000 |
| H | 2.553768000  | 9.149962000  | 7.743002000 |
| P | 0.369359000  | 10.687919000 | 4.157454000 |
| O | 1.108393000  | 9.979841000  | 2.917701000 |
| O | -1.113032000 | 10.718444000 | 3.600101000 |
| O | 0.464433000  | 9.636628000  | 5.339530000 |
| C | 2.501738000  | 9.665039000  | 3.017049000 |
| C | -1.717340000 | 9.741273000  | 2.739898000 |
| C | 0.011266000  | 8.283779000  | 5.221654000 |
| H | 3.090218000  | 10.568170000 | 3.179100000 |
| H | 2.685511000  | 8.969940000  | 3.835689000 |
| H | 2.785827000  | 9.204839000  | 2.076939000 |
| H | -2.575756000 | 10.223404000 | 2.283565000 |
| H | -1.022653000 | 9.418981000  | 1.968886000 |
| H | -2.057509000 | 8.885136000  | 3.316988000 |
| H | 0.201474000  | 7.883706000  | 4.226209000 |
| H | 0.561504000  | 7.700557000  | 5.953188000 |
| H | -1.051480000 | 8.231427000  | 5.447697000 |

13

structure of P

|   |              |              |              |
|---|--------------|--------------|--------------|
| P | -1.477582000 | -0.505533000 | -0.338766000 |
| C | -0.804268000 | 0.651517000  | 0.921982000  |
| H | -1.193324000 | 1.653174000  | 0.752807000  |
| H | -1.121011000 | 0.343611000  | 1.916054000  |
| H | 0.285253000  | 0.696917000  | 0.905357000  |
| C | -0.447658000 | -1.979722000 | 0.045432000  |
| H | -0.748156000 | -2.404490000 | 1.000722000  |
| H | -0.597741000 | -2.745688000 | -0.712250000 |
| H | 0.616065000  | -1.743589000 | 0.091803000  |
| C | -0.561614000 | 0.108776000  | -1.810180000 |

|   |              |              |              |
|---|--------------|--------------|--------------|
| H | -0.715337000 | -0.563658000 | -2.651310000 |
| H | -0.939812000 | 1.086002000  | -2.102252000 |
| H | 0.510210000  | 0.193755000  | -1.627429000 |

45

structure of TS\_1\_IM1:P

|    |              |              |              |
|----|--------------|--------------|--------------|
| Ir | 1.377945000  | 12.492860000 | 4.610559000  |
| C  | 1.735872000  | 11.435722000 | 7.568697000  |
| H  | 2.237916000  | 10.476442000 | 7.682928000  |
| H  | 1.183879000  | 11.592610000 | 8.492923000  |
| C  | 2.747571000  | 12.556620000 | 7.375606000  |
| H  | 2.321582000  | 13.497489000 | 7.726645000  |
| H  | 3.641138000  | 12.397192000 | 7.985744000  |
| C  | 3.151658000  | 12.723141000 | 5.939458000  |
| H  | 3.581177000  | 13.689645000 | 5.697775000  |
| C  | 3.423885000  | 11.693202000 | 5.032285000  |
| H  | 4.003695000  | 11.975421000 | 4.164292000  |
| C  | 3.441591000  | 10.219366000 | 5.367600000  |
| H  | 3.847425000  | 10.096812000 | 6.371954000  |
| H  | 4.150470000  | 9.734790000  | 4.701225000  |
| C  | 2.082871000  | 9.516402000  | 5.238097000  |
| H  | 2.025370000  | 9.015825000  | 4.276614000  |
| H  | 1.985573000  | 8.735322000  | 5.996964000  |
| C  | 0.909614000  | 10.444700000 | 5.354302000  |
| H  | 0.016676000  | 10.138164000 | 4.823533000  |
| C  | 0.759559000  | 11.345847000 | 6.416560000  |
| H  | -0.248223000 | 11.681332000 | 6.628441000  |
| C  | 1.475860000  | 14.456093000 | 3.608958000  |
| C  | 1.080245000  | 14.632240000 | 4.973828000  |
| C  | 0.362056000  | 13.879785000 | 2.897206000  |
| H  | 2.359470000  | 14.870573000 | 3.152919000  |
| C  | -0.155123000 | 13.954817000 | 5.159244000  |
| H  | 1.626507000  | 15.166348000 | 5.733460000  |
| C  | -0.526542000 | 13.368003000 | 3.908949000  |
| H  | -0.706710000 | 13.891521000 | 6.082406000  |
| H  | -1.427674000 | 12.807887000 | 3.723447000  |
| Br | 1.850828000  | 11.148346000 | 2.416187000  |
| H  | 0.458930000  | 13.433299000 | 1.924456000  |
| P  | -0.863866000 | 15.941334000 | 1.838842000  |
| C  | -1.669633000 | 15.972246000 | 0.210158000  |
| H  | -0.941322000 | 15.770046000 | -0.570590000 |
| H  | -2.438373000 | 15.205979000 | 0.157514000  |
| H  | -2.128871000 | 16.940712000 | 0.016459000  |
| C  | -2.176026000 | 16.458124000 | 2.986098000  |

|   |              |              |             |
|---|--------------|--------------|-------------|
| H | -2.953628000 | 15.699541000 | 3.034833000 |
| H | -1.768273000 | 16.587185000 | 3.986260000 |
| H | -2.630416000 | 17.398459000 | 2.677879000 |
| C | 0.251925000  | 17.376086000 | 1.803439000 |
| H | 0.709809000  | 17.516941000 | 2.779990000 |
| H | 1.046697000  | 17.216249000 | 1.078999000 |
| H | -0.278846000 | 18.289172000 | 1.538290000 |

45

structure of IM1:P

|    |              |              |             |
|----|--------------|--------------|-------------|
| Ir | 1.485714000  | 12.814050000 | 4.575950000 |
| C  | 0.789955000  | 10.369101000 | 6.451249000 |
| H  | 1.598905000  | 9.671240000  | 6.660782000 |
| H  | -0.128319000 | 9.826392000  | 6.666817000 |
| C  | 0.885757000  | 11.595355000 | 7.349177000 |
| H  | -0.109681000 | 12.018540000 | 7.492679000 |
| H  | 1.235769000  | 11.329683000 | 8.351171000 |
| C  | 1.774841000  | 12.660701000 | 6.771772000 |
| H  | 1.612760000  | 13.654648000 | 7.176601000 |
| C  | 3.010148000  | 12.448380000 | 6.145075000 |
| H  | 3.663440000  | 13.309138000 | 6.092667000 |
| C  | 3.699891000  | 11.106964000 | 6.020814000 |
| H  | 3.485088000  | 10.515323000 | 6.910693000 |
| H  | 4.773631000  | 11.278225000 | 6.034452000 |
| C  | 3.335446000  | 10.335817000 | 4.747177000 |
| H  | 4.073101000  | 10.546184000 | 3.977336000 |
| H  | 3.376762000  | 9.257727000  | 4.925550000 |
| C  | 1.983213000  | 10.695734000 | 4.198520000 |
| H  | 1.862202000  | 10.537725000 | 3.133287000 |
| C  | 0.818373000  | 10.734138000 | 4.981732000 |
| H  | -0.120169000 | 10.611056000 | 4.454637000 |
| C  | 0.984143000  | 14.935979000 | 4.464145000 |
| C  | -0.108533000 | 14.200428000 | 5.034240000 |
| C  | 0.864092000  | 14.872500000 | 2.954846000 |
| H  | 1.513259000  | 15.720019000 | 4.985577000 |
| C  | -0.557828000 | 13.286001000 | 4.041167000 |
| H  | -0.498388000 | 14.288365000 | 6.035389000 |
| C  | 0.264314000  | 13.481931000 | 2.887274000 |
| H  | -1.343835000 | 12.558057000 | 4.159899000 |
| H  | 0.148815000  | 12.926924000 | 1.968178000 |
| Br | 3.644496000  | 13.264186000 | 3.142425000 |
| H  | 1.846219000  | 14.908829000 | 2.472487000 |
| P  | -0.110419000 | 16.202406000 | 2.171943000 |
| C  | -0.218637000 | 15.889081000 | 0.414118000 |

|   |              |              |              |
|---|--------------|--------------|--------------|
| H | 0.780633000  | 15.813187000 | -0.007955000 |
| H | -0.741334000 | 14.952308000 | 0.237580000  |
| H | -0.754651000 | 16.689275000 | -0.089705000 |
| C | -1.763733000 | 16.296635000 | 2.849091000  |
| H | -2.284896000 | 15.356019000 | 2.689525000  |
| H | -1.716722000 | 16.493638000 | 3.917171000  |
| H | -2.325181000 | 17.094610000 | 2.369430000  |
| C | 0.717953000  | 17.764514000 | 2.442422000  |
| H | 1.730362000  | 17.716912000 | 2.048515000  |
| H | 0.185899000  | 18.575269000 | 1.951458000  |
| H | 0.770306000  | 17.974555000 | 3.507826000  |

45

structure of TS\_IM1\_IM2:P

|    |              |              |              |
|----|--------------|--------------|--------------|
| Ir | 1.025099000  | -0.617111000 | 0.918215000  |
| C  | 0.271293000  | -3.278159000 | 2.368234000  |
| H  | 1.050770000  | -4.022166000 | 2.527924000  |
| H  | -0.667411000 | -3.825842000 | 2.414696000  |
| C  | 0.301312000  | -2.195174000 | 3.439637000  |
| H  | -0.714571000 | -1.860363000 | 3.649276000  |
| H  | 0.691594000  | -2.566005000 | 4.391752000  |
| C  | 1.104810000  | -1.010877000 | 2.978024000  |
| H  | 0.875770000  | -0.083086000 | 3.497947000  |
| C  | 2.429822000  | -1.117450000 | 2.421234000  |
| H  | 3.058323000  | -0.243577000 | 2.544259000  |
| C  | 3.184811000  | -2.424941000 | 2.283537000  |
| H  | 2.838552000  | -3.142845000 | 3.026020000  |
| H  | 4.237148000  | -2.259839000 | 2.501358000  |
| C  | 3.013389000  | -2.947221000 | 0.866208000  |
| H  | 3.790501000  | -2.530209000 | 0.227663000  |
| H  | 3.112906000  | -4.034599000 | 0.797058000  |
| C  | 1.682997000  | -2.520953000 | 0.312970000  |
| H  | 1.632779000  | -2.512782000 | -0.773981000 |
| C  | 0.423723000  | -2.660693000 | 0.991142000  |
| H  | -0.426051000 | -2.806783000 | 0.335290000  |
| C  | -0.339842000 | 0.877918000  | 0.040710000  |
| C  | -1.164684000 | -0.073829000 | 0.684586000  |
| C  | -0.508208000 | 0.726350000  | -1.457073000 |
| H  | -0.034935000 | 1.818699000  | 0.479111000  |
| C  | -1.824842000 | -0.853125000 | -0.363891000 |
| H  | -1.577030000 | 0.031192000  | 1.677759000  |
| C  | -1.465776000 | -0.424232000 | -1.582731000 |
| H  | -2.492163000 | -1.680411000 | -0.172604000 |
| H  | -1.747133000 | -0.865086000 | -2.526405000 |



|    |              |             |              |
|----|--------------|-------------|--------------|
| Br | 2.785662000  | 0.797950000 | -0.320510000 |
| H  | 0.449279000  | 0.552163000 | -1.966296000 |
| P  | -1.119301000 | 2.259360000 | -2.197668000 |
| C  | -1.425405000 | 2.006644000 | -3.941080000 |
| H  | -0.521037000 | 1.650514000 | -4.428495000 |
| H  | -2.213450000 | 1.271128000 | -4.079722000 |
| H  | -1.730615000 | 2.938406000 | -4.410591000 |
| C  | -2.633484000 | 2.769597000 | -1.399634000 |
| H  | -3.375452000 | 1.979385000 | -1.485629000 |
| H  | -2.449871000 | 2.963453000 | -0.346134000 |
| H  | -3.020746000 | 3.673308000 | -1.862830000 |
| C  | 0.137829000  | 3.511944000 | -2.000487000 |
| H  | 1.075398000  | 3.154406000 | -2.421416000 |
| H  | -0.156101000 | 4.432204000 | -2.498636000 |
| H  | 0.302707000  | 3.716218000 | -0.945726000 |

45

structure of IM2:P

|    |              |              |             |
|----|--------------|--------------|-------------|
| Ir | 0.168737000  | 12.909434000 | 5.404503000 |
| C  | 1.512565000  | 10.318545000 | 6.386083000 |
| H  | 2.545189000  | 10.117211000 | 6.108790000 |
| H  | 1.101558000  | 9.359918000  | 6.694775000 |
| C  | 1.437227000  | 11.298522000 | 7.558992000 |
| H  | 0.534212000  | 11.098886000 | 8.136939000 |
| H  | 2.268567000  | 11.146095000 | 8.253897000 |
| C  | 1.405619000  | 12.739258000 | 7.121359000 |
| H  | 1.059308000  | 13.422827000 | 7.893181000 |
| C  | 2.197255000  | 13.293779000 | 6.090947000 |
| H  | 2.367941000  | 14.359242000 | 6.162866000 |
| C  | 3.261333000  | 12.544250000 | 5.316700000 |
| H  | 3.692405000  | 11.761644000 | 5.937949000 |
| H  | 4.082999000  | 13.223455000 | 5.096311000 |
| C  | 2.718422000  | 11.970472000 | 4.007611000 |
| H  | 2.780579000  | 12.726121000 | 3.224024000 |
| H  | 3.334798000  | 11.136424000 | 3.659119000 |
| C  | 1.291273000  | 11.531959000 | 4.115630000 |
| H  | 0.738236000  | 11.509286000 | 3.182613000 |
| C  | 0.732803000  | 10.819767000 | 5.191204000 |
| H  | -0.191875000 | 10.296555000 | 4.972991000 |
| C  | -0.643792000 | 14.878867000 | 5.815031000 |
| C  | -0.048513000 | 14.948577000 | 4.522048000 |
| H  | -1.710539000 | 14.723693000 | 5.932989000 |
| H  | -0.568598000 | 14.726005000 | 3.601994000 |
| Br | -1.982479000 | 12.417652000 | 4.243577000 |

|   |              |              |             |
|---|--------------|--------------|-------------|
| C | 1.073157000  | 15.867714000 | 4.572030000 |
| C | 1.173036000  | 16.421099000 | 5.790378000 |
| C | 0.081053000  | 15.898187000 | 6.680936000 |
| H | 1.950356000  | 17.088276000 | 6.132828000 |
| P | -1.076190000 | 17.227189000 | 7.115048000 |
| H | 0.463154000  | 15.517451000 | 7.635142000 |
| H | 1.744839000  | 16.053109000 | 3.746847000 |
| C | -0.212327000 | 18.546262000 | 7.959565000 |
| H | 0.295382000  | 18.160701000 | 8.840293000 |
| H | 0.523778000  | 18.993310000 | 7.296582000 |
| H | -0.913704000 | 19.316354000 | 8.271168000 |
| C | -1.829479000 | 17.873761000 | 5.631489000 |
| H | -1.057111000 | 18.218486000 | 4.948384000 |
| H | -2.412080000 | 17.098879000 | 5.140150000 |
| H | -2.482880000 | 18.706349000 | 5.879310000 |
| C | -2.344992000 | 16.582356000 | 8.196617000 |
| H | -1.897606000 | 16.195677000 | 9.108893000 |
| H | -3.050678000 | 17.366849000 | 8.458353000 |
| H | -2.884263000 | 15.777937000 | 7.702951000 |

58

structure of IM3:P

|    |              |              |             |
|----|--------------|--------------|-------------|
| Ir | 0.180335000  | 13.060552000 | 5.751264000 |
| C  | 1.892809000  | 10.476977000 | 6.246621000 |
| H  | 2.841972000  | 10.378753000 | 5.719874000 |
| H  | 1.623490000  | 9.463216000  | 6.538160000 |
| C  | 2.055490000  | 11.338339000 | 7.496824000 |
| H  | 1.389003000  | 10.965894000 | 8.275698000 |
| H  | 3.062270000  | 11.248860000 | 7.917017000 |
| C  | 1.752284000  | 12.794328000 | 7.253346000 |
| H  | 1.518589000  | 13.363771000 | 8.146340000 |
| C  | 2.266382000  | 13.530433000 | 6.170230000 |
| H  | 2.347303000  | 14.595053000 | 6.338377000 |
| C  | 3.247004000  | 12.969099000 | 5.159052000 |
| H  | 3.875129000  | 12.224024000 | 5.648166000 |
| H  | 3.926160000  | 13.764434000 | 4.854992000 |
| C  | 2.556757000  | 12.383301000 | 3.929349000 |
| H  | 2.480837000  | 13.149461000 | 3.157997000 |
| H  | 3.158704000  | 11.582353000 | 3.489229000 |
| C  | 1.167687000  | 11.886649000 | 4.223364000 |
| H  | 0.506874000  | 11.845468000 | 3.365102000 |
| C  | 0.840831000  | 11.027959000 | 5.305014000 |
| H  | -0.036642000 | 10.408158000 | 5.159032000 |
| C  | -0.573202000 | 15.095978000 | 5.846287000 |

|    |              |              |              |
|----|--------------|--------------|--------------|
| C  | 0.081100000  | 14.922249000 | 4.562171000  |
| H  | -1.657138000 | 15.060480000 | 5.900093000  |
| H  | -0.454034000 | 14.653726000 | 3.662201000  |
| Br | -2.004345000 | 12.548557000 | 4.451777000  |
| C  | 1.205264000  | 15.842086000 | 4.509573000  |
| C  | 1.285843000  | 16.591611000 | 5.619728000  |
| C  | 0.136533000  | 16.259622000 | 6.537233000  |
| H  | 2.073001000  | 17.284095000 | 5.878748000  |
| P  | -0.985926000 | 17.684237000 | 6.576267000  |
| H  | 0.441099000  | 16.077895000 | 7.574497000  |
| H  | 1.910460000  | 15.884099000 | 3.691000000  |
| P  | -1.232862000 | 12.373531000 | 7.623214000  |
| C  | -1.583251000 | 18.018548000 | 4.927334000  |
| H  | -0.740345000 | 18.198358000 | 4.265147000  |
| H  | -2.142030000 | 17.163090000 | 4.556345000  |
| H  | -2.228937000 | 18.892812000 | 4.934305000  |
| C  | -2.390268000 | 17.347994000 | 7.635927000  |
| H  | -2.965215000 | 16.518863000 | 7.230940000  |
| H  | -2.054085000 | 17.090034000 | 8.637493000  |
| H  | -3.036577000 | 18.219931000 | 7.698183000  |
| C  | -0.139814000 | 19.133614000 | 7.198654000  |
| H  | -0.821031000 | 19.979243000 | 7.249438000  |
| H  | 0.253313000  | 18.941601000 | 8.193934000  |
| H  | 0.685527000  | 19.388783000 | 6.539223000  |
| C  | -2.820573000 | 13.255164000 | 7.728194000  |
| H  | -2.632852000 | 14.285071000 | 8.025328000  |
| H  | -3.328604000 | 13.245483000 | 6.768617000  |
| H  | -3.456495000 | 12.795398000 | 8.482293000  |
| C  | -1.709451000 | 10.626741000 | 7.579645000  |
| H  | -2.174853000 | 10.414646000 | 6.619707000  |
| H  | -0.827886000 | 9.997746000  | 7.679707000  |
| H  | -2.406365000 | 10.386679000 | 8.380224000  |
| C  | -0.660292000 | 12.616319000 | 9.338521000  |
| H  | -1.442648000 | 12.319783000 | 10.034735000 |
| H  | 0.231595000  | 12.040259000 | 9.562988000  |
| H  | -0.435898000 | 13.668604000 | 9.505506000  |

58

structure of TS\_IM3\_IM4:P

|    |             |              |             |
|----|-------------|--------------|-------------|
| Ir | 0.190807000 | 12.456586000 | 5.885113000 |
| C  | 2.166434000 | 10.096544000 | 5.783676000 |
| H  | 3.087444000 | 10.243778000 | 5.218733000 |
| H  | 2.036674000 | 9.018556000  | 5.855099000 |
| C  | 2.293240000 | 10.695321000 | 7.180855000 |

|    |              |              |              |
|----|--------------|--------------|--------------|
| H  | 1.676172000  | 10.124909000 | 7.878186000  |
| H  | 3.316669000  | 10.608936000 | 7.558896000  |
| C  | 1.838912000  | 12.128378000 | 7.233776000  |
| H  | 1.625530000  | 12.481756000 | 8.233723000  |
| C  | 2.179356000  | 13.128350000 | 6.294475000  |
| H  | 2.128499000  | 14.148628000 | 6.667131000  |
| C  | 3.168868000  | 12.916674000 | 5.161757000  |
| H  | 3.926604000  | 12.201286000 | 5.483598000  |
| H  | 3.709485000  | 13.847327000 | 4.990132000  |
| C  | 2.503634000  | 12.453764000 | 3.862765000  |
| H  | 2.330482000  | 13.313628000 | 3.213809000  |
| H  | 3.176151000  | 11.799347000 | 3.299297000  |
| C  | 1.177185000  | 11.783118000 | 4.104455000  |
| H  | 0.487438000  | 11.809816000 | 3.266977000  |
| C  | 1.004736000  | 10.699399000 | 5.019421000  |
| H  | 0.180428000  | 10.024662000 | 4.812603000  |
| C  | -0.799144000 | 15.059236000 | 5.660790000  |
| C  | -0.048470000 | 14.856605000 | 4.538761000  |
| H  | -1.786525000 | 14.663729000 | 5.836786000  |
| H  | -0.338124000 | 14.241617000 | 3.701709000  |
| Br | -2.038681000 | 12.066078000 | 4.652805000  |
| C  | 1.127796000  | 15.702627000 | 4.593365000  |
| C  | 1.110255000  | 16.448967000 | 5.712133000  |
| C  | -0.149437000 | 16.146077000 | 6.468318000  |
| H  | 1.867081000  | 17.136672000 | 6.054227000  |
| P  | -1.233509000 | 17.602238000 | 6.411944000  |
| H  | 0.009432000  | 15.912811000 | 7.525737000  |
| H  | 1.910454000  | 15.708529000 | 3.849851000  |
| P  | -1.176186000 | 12.283907000 | 7.840498000  |
| C  | -0.491775000 | 12.488723000 | 9.522177000  |
| H  | 0.265450000  | 11.735207000 | 9.722802000  |
| H  | -0.032466000 | 13.467954000 | 9.644569000  |
| H  | -1.279617000 | 12.380013000 | 10.265383000 |
| C  | -2.677193000 | 13.315905000 | 7.971513000  |
| H  | -2.396189000 | 14.346039000 | 8.186605000  |
| H  | -3.224471000 | 13.279797000 | 7.031250000  |
| H  | -3.325364000 | 12.966750000 | 8.773308000  |
| C  | -1.861634000 | 10.602999000 | 7.938097000  |
| H  | -1.048303000 | 9.881990000  | 7.977998000  |
| H  | -2.490176000 | 10.478087000 | 8.818406000  |
| H  | -2.443706000 | 10.405315000 | 7.041773000  |
| C  | -1.609435000 | 18.018966000 | 4.717814000  |
| H  | -0.688176000 | 18.147341000 | 4.155797000  |

|   |              |              |             |
|---|--------------|--------------|-------------|
| H | -2.193948000 | 17.225958000 | 4.259964000 |
| H | -2.177983000 | 18.945140000 | 4.688294000 |
| C | -0.434739000 | 18.995949000 | 7.200795000 |
| H | -0.148659000 | 18.740639000 | 8.218149000 |
| H | 0.456044000  | 19.276872000 | 6.645306000 |
| H | -1.110088000 | 19.847480000 | 7.232473000 |
| C | -2.760040000 | 17.258527000 | 7.278766000 |
| H | -2.559075000 | 17.026095000 | 8.321652000 |
| H | -3.416051000 | 18.124691000 | 7.236082000 |
| H | -3.266650000 | 16.413066000 | 6.819446000 |

23

structure of diene:P

|   |              |              |             |
|---|--------------|--------------|-------------|
| C | -0.523089000 | 14.886578000 | 5.693510000 |
| C | 0.089542000  | 14.779639000 | 4.503116000 |
| H | -1.315651000 | 14.267142000 | 6.080997000 |
| H | -0.136906000 | 14.049149000 | 3.742076000 |
| C | 1.135654000  | 15.781356000 | 4.399263000 |
| C | 1.175261000  | 16.512901000 | 5.524876000 |
| C | 0.107166000  | 16.015580000 | 6.450874000 |
| H | 1.860954000  | 17.309074000 | 5.765579000 |
| P | -1.109333000 | 17.319117000 | 6.769652000 |
| H | 0.496795000  | 15.710040000 | 7.427100000 |
| H | 1.791836000  | 15.896120000 | 3.550544000 |
| C | -2.414694000 | 16.682828000 | 7.812183000 |
| H | -2.945838000 | 15.883151000 | 7.302944000 |
| H | -2.001916000 | 16.296318000 | 8.740768000 |
| H | -3.121277000 | 17.474785000 | 8.048661000 |
| C | -0.321050000 | 18.686623000 | 7.608941000 |
| H | -1.057140000 | 19.450580000 | 7.847496000 |
| H | 0.140198000  | 18.347353000 | 8.533158000 |
| H | 0.443637000  | 19.126294000 | 6.974228000 |
| C | -1.805344000 | 17.890593000 | 5.229114000 |
| H | -2.535339000 | 18.671994000 | 5.425051000 |
| H | -1.021038000 | 18.289178000 | 4.591387000 |
| H | -2.294803000 | 17.068631000 | 4.713849000 |

35

structure of IM4:P

|    |             |              |             |
|----|-------------|--------------|-------------|
| Ir | 1.058030000 | 13.028783000 | 5.365354000 |
| C  | 1.786518000 | 11.121857000 | 7.710126000 |
| H  | 2.594226000 | 10.407567000 | 7.553204000 |
| H  | 1.230825000 | 10.750921000 | 8.570104000 |
| C  | 2.348834000 | 12.509842000 | 8.030257000 |
| H  | 1.646522000 | 13.037004000 | 8.677471000 |

|    |              |              |             |
|----|--------------|--------------|-------------|
| H  | 3.277141000  | 12.426192000 | 8.606015000 |
| C  | 2.557274000  | 13.356801000 | 6.802769000 |
| H  | 2.661416000  | 14.413834000 | 7.037700000 |
| C  | 3.164516000  | 12.909599000 | 5.592236000 |
| H  | 3.668732000  | 13.668378000 | 5.002719000 |
| C  | 3.731703000  | 11.513856000 | 5.409158000 |
| H  | 4.096525000  | 11.133452000 | 6.363694000 |
| H  | 4.608672000  | 11.562198000 | 4.764853000 |
| C  | 2.710489000  | 10.552779000 | 4.795088000 |
| H  | 2.759933000  | 10.624486000 | 3.708551000 |
| H  | 2.962794000  | 9.514578000  | 5.035660000 |
| C  | 1.297815000  | 10.852786000 | 5.206789000 |
| H  | 0.530992000  | 10.551771000 | 4.501541000 |
| C  | 0.878802000  | 11.137550000 | 6.505220000 |
| H  | -0.184583000 | 11.056483000 | 6.699257000 |
| P  | 1.022941000  | 15.228523000 | 4.665272000 |
| Br | -1.322226000 | 12.830550000 | 4.524056000 |
| C  | 0.519015000  | 15.482755000 | 2.939473000 |
| H  | 1.218174000  | 14.984879000 | 2.272709000 |
| H  | -0.462047000 | 15.038499000 | 2.793639000 |
| H  | 0.485704000  | 16.543204000 | 2.693878000 |
| C  | 2.563528000  | 16.199382000 | 4.758264000 |
| H  | 2.968082000  | 16.190224000 | 5.767516000 |
| H  | 3.311940000  | 15.776620000 | 4.092346000 |
| H  | 2.386878000  | 17.232740000 | 4.465579000 |
| C  | -0.154026000 | 16.255572000 | 5.594318000 |
| H  | -0.183190000 | 17.275541000 | 5.213906000 |
| H  | -1.141183000 | 15.806593000 | 5.512726000 |
| H  | 0.123037000  | 16.276160000 | 6.645692000 |

48

structure of TS\_IM4\_IM5:P

|    |             |              |             |
|----|-------------|--------------|-------------|
| Ir | 0.930404000 | 12.921484000 | 5.330743000 |
| C  | 1.782935000 | 10.396243000 | 6.922503000 |
| H  | 2.493087000 | 9.681305000  | 6.503945000 |
| H  | 1.262354000 | 9.861043000  | 7.716460000 |
| C  | 2.527972000 | 11.593950000 | 7.531738000 |
| H  | 2.016205000 | 11.900818000 | 8.444743000 |
| H  | 3.536921000 | 11.298183000 | 7.840921000 |
| C  | 2.588729000 | 12.789817000 | 6.615230000 |
| H  | 2.762166000 | 13.725158000 | 7.142458000 |
| C  | 3.036726000 | 12.716997000 | 5.261653000 |
| H  | 3.512417000 | 13.603608000 | 4.852535000 |
| C  | 3.523964000 | 11.421105000 | 4.639945000 |

|    |              |              |              |
|----|--------------|--------------|--------------|
| H  | 3.930496000  | 10.772244000 | 5.416998000  |
| H  | 4.357199000  | 11.626901000 | 3.968995000  |
| C  | 2.411461000  | 10.711462000 | 3.871623000  |
| H  | 2.365490000  | 11.106494000 | 2.856709000  |
| H  | 2.630248000  | 9.643121000  | 3.767672000  |
| C  | 1.061695000  | 10.906029000 | 4.500178000  |
| H  | 0.219637000  | 10.822451000 | 3.822773000  |
| C  | 0.777828000  | 10.787852000 | 5.864758000  |
| H  | -0.265136000 | 10.649235000 | 6.124637000  |
| P  | 1.032215000  | 15.211548000 | 5.043134000  |
| Br | -1.469636000 | 13.037906000 | 4.432014000  |
| P  | -0.667658000 | 13.093072000 | 8.341474000  |
| C  | 1.149983000  | 15.631231000 | 3.278298000  |
| H  | 2.042521000  | 15.179957000 | 2.852167000  |
| H  | 0.284331000  | 15.213018000 | 2.769872000  |
| H  | 1.180839000  | 16.708927000 | 3.121184000  |
| C  | -0.371890000 | 16.234044000 | 5.586413000  |
| H  | -0.235780000 | 17.273562000 | 5.291797000  |
| H  | -1.283467000 | 15.841533000 | 5.142204000  |
| H  | -0.473429000 | 16.189323000 | 6.668402000  |
| C  | 2.438199000  | 16.119070000 | 5.771515000  |
| H  | 3.383565000  | 15.660576000 | 5.491142000  |
| H  | 2.444446000  | 17.156745000 | 5.442839000  |
| H  | 2.367770000  | 16.102655000 | 6.857063000  |
| C  | 0.194992000  | 14.472086000 | 9.201409000  |
| H  | 1.153856000  | 14.124288000 | 9.582832000  |
| H  | 0.401431000  | 15.279201000 | 8.500152000  |
| H  | -0.379915000 | 14.878225000 | 10.034372000 |
| C  | -1.037910000 | 12.037588000 | 9.803073000  |
| H  | -1.685694000 | 11.215003000 | 9.507575000  |
| H  | -0.116892000 | 11.605195000 | 10.190527000 |
| H  | -1.525432000 | 12.589183000 | 10.607990000 |
| C  | -2.314970000 | 13.847246000 | 8.075364000  |
| H  | -2.252567000 | 14.603466000 | 7.296030000  |
| H  | -3.002772000 | 13.087312000 | 7.711295000  |
| H  | -2.724494000 | 14.294212000 | 8.981719000  |

48

structure of IM5:P

|    |             |              |             |
|----|-------------|--------------|-------------|
| Ir | 0.631380000 | 12.876883000 | 6.105576000 |
| C  | 1.662834000 | 9.923058000  | 6.279028000 |
| H  | 2.557406000 | 9.691283000  | 5.697395000 |
| H  | 1.179292000 | 8.963505000  | 6.458788000 |
| C  | 2.030775000 | 10.574419000 | 7.602155000 |

|    |              |              |              |
|----|--------------|--------------|--------------|
| H  | 1.278875000  | 10.311842000 | 8.348561000  |
| H  | 2.984161000  | 10.202637000 | 7.998280000  |
| C  | 2.065470000  | 12.078683000 | 7.500575000  |
| H  | 2.031548000  | 12.562448000 | 8.472890000  |
| C  | 2.738283000  | 12.817738000 | 6.485136000  |
| H  | 3.117001000  | 13.785665000 | 6.797015000  |
| C  | 3.552983000  | 12.145113000 | 5.390406000  |
| H  | 4.015084000  | 11.243635000 | 5.797533000  |
| H  | 4.386339000  | 12.794141000 | 5.120335000  |
| C  | 2.725173000  | 11.816281000 | 4.145871000  |
| H  | 2.853415000  | 12.617252000 | 3.414160000  |
| H  | 3.109993000  | 10.914967000 | 3.654433000  |
| C  | 1.251075000  | 11.691940000 | 4.447867000  |
| H  | 0.602245000  | 11.841135000 | 3.589530000  |
| C  | 0.741403000  | 10.825797000 | 5.479653000  |
| H  | -0.259469000 | 10.442630000 | 5.317191000  |
| P  | 0.835417000  | 15.048493000 | 5.058499000  |
| Br | -1.761080000 | 12.895929000 | 5.030906000  |
| P  | -0.351962000 | 13.649897000 | 8.107857000  |
| C  | 0.704416000  | 14.924092000 | 3.246649000  |
| H  | 1.497375000  | 14.287603000 | 2.861074000  |
| H  | -0.248808000 | 14.458263000 | 3.003799000  |
| H  | 0.766844000  | 15.900156000 | 2.767031000  |
| C  | 2.413736000  | 15.948377000 | 5.249031000  |
| H  | 2.591235000  | 16.187882000 | 6.295803000  |
| H  | 3.236332000  | 15.323766000 | 4.906727000  |
| H  | 2.418583000  | 16.873814000 | 4.674575000  |
| C  | -0.380389000 | 16.370218000 | 5.384318000  |
| H  | -1.376927000 | 15.969985000 | 5.206221000  |
| H  | -0.319802000 | 16.703077000 | 6.418484000  |
| H  | -0.221371000 | 17.229926000 | 4.734082000  |
| C  | 0.616524000  | 14.899659000 | 9.032489000  |
| H  | 1.635353000  | 14.551983000 | 9.191875000  |
| H  | 0.669494000  | 15.817552000 | 8.449732000  |
| H  | 0.173211000  | 15.129604000 | 10.000661000 |
| C  | -0.647663000 | 12.401674000 | 9.410079000  |
| H  | -1.303003000 | 11.628743000 | 9.014749000  |
| H  | 0.284788000  | 11.929355000 | 9.708707000  |
| H  | -1.111944000 | 12.842747000 | 10.291518000 |
| C  | -1.988816000 | 14.444331000 | 8.059139000  |
| H  | -2.269484000 | 14.796534000 | 9.051040000  |
| H  | -1.992614000 | 15.280208000 | 7.366137000  |
| H  | -2.724487000 | 13.729531000 | 7.701977000  |



## structure of TS\_IM5\_IM6:P

|    |              |              |              |
|----|--------------|--------------|--------------|
| Ir | -0.267935000 | -0.385354000 | -0.201358000 |
| C  | 0.828458000  | -3.303436000 | 0.118230000  |
| H  | 1.678907000  | -3.583610000 | -0.507010000 |
| H  | 0.364994000  | -4.245108000 | 0.410343000  |
| C  | 1.290755000  | -2.548417000 | 1.355221000  |
| H  | 0.620395000  | -2.776300000 | 2.185836000  |
| H  | 2.286358000  | -2.867604000 | 1.687964000  |
| C  | 1.275555000  | -1.054335000 | 1.148671000  |
| H  | 1.288936000  | -0.498156000 | 2.077496000  |
| C  | 1.864720000  | -0.385325000 | 0.040406000  |
| H  | 2.238087000  | 0.610549000  | 0.250671000  |
| C  | 2.621301000  | -1.128635000 | -1.049730000 |
| H  | 3.113622000  | -1.997352000 | -0.608049000 |
| H  | 3.431932000  | -0.496753000 | -1.413395000 |
| C  | 1.722377000  | -1.547614000 | -2.213497000 |
| H  | 1.786914000  | -0.792688000 | -3.000626000 |
| H  | 2.088251000  | -2.473677000 | -2.672259000 |
| C  | 0.275050000  | -1.668041000 | -1.803258000 |
| H  | -0.429186000 | -1.590340000 | -2.626916000 |
| C  | -0.155622000 | -2.469580000 | -0.682152000 |
| H  | -1.153748000 | -2.885734000 | -0.764325000 |
| P  | -0.139143000 | 1.734610000  | -1.344770000 |
| Br | -2.711030000 | -0.488077000 | -1.147871000 |
| P  | -1.340153000 | 0.315449000  | 1.813147000  |
| C  | -0.407353000 | 1.520519000  | -3.134630000 |
| H  | 0.343385000  | 0.846725000  | -3.541145000 |
| H  | -1.383448000 | 1.065164000  | -3.288304000 |
| H  | -0.359481000 | 2.469379000  | -3.667624000 |
| C  | 1.454494000  | 2.628301000  | -1.335254000 |
| H  | 1.724153000  | 2.917829000  | -0.321478000 |
| H  | 2.241765000  | 1.982932000  | -1.719310000 |
| H  | 1.409414000  | 3.524426000  | -1.952762000 |
| C  | -1.306820000 | 3.093001000  | -0.995444000 |
| H  | -2.320789000 | 2.698427000  | -1.010181000 |
| H  | -1.111211000 | 3.511136000  | -0.010207000 |
| H  | -1.224271000 | 3.890639000  | -1.733132000 |
| C  | -0.378634000 | 1.109280000  | 3.157530000  |
| H  | 0.352912000  | 0.428355000  | 3.583514000  |
| H  | 0.154116000  | 1.976087000  | 2.769522000  |
| H  | -1.038661000 | 1.437295000  | 3.959181000  |
| C  | -2.109945000 | -1.082219000 | 2.696979000  |

|   |              |              |             |
|---|--------------|--------------|-------------|
| H | -2.826216000 | -1.556123000 | 2.028794000 |
| H | -1.350902000 | -1.819007000 | 2.950307000 |
| H | -2.619848000 | -0.768336000 | 3.607547000 |
| C | -2.742010000 | 1.481763000  | 1.737484000 |
| H | -3.251026000 | 1.518070000  | 2.699594000 |
| H | -2.387375000 | 2.480605000  | 1.499451000 |
| H | -3.442047000 | 1.171282000  | 0.966797000 |

48

structure of IM6:P

|    |              |              |              |
|----|--------------|--------------|--------------|
| Ir | 0.156126000  | -0.512662000 | -0.363497000 |
| C  | 1.554981000  | -3.068864000 | 0.851709000  |
| H  | 2.095949000  | -3.749651000 | 0.193872000  |
| H  | 1.362382000  | -3.638628000 | 1.760803000  |
| C  | 2.410863000  | -1.845788000 | 1.181983000  |
| H  | 2.188658000  | -1.521261000 | 2.201665000  |
| H  | 3.475579000  | -2.106652000 | 1.184448000  |
| C  | 2.141543000  | -0.679029000 | 0.263774000  |
| H  | 2.551673000  | 0.244593000  | 0.665834000  |
| C  | 2.119130000  | -0.780876000 | -1.186765000 |
| H  | 2.523838000  | 0.083660000  | -1.706698000 |
| C  | 2.375554000  | -2.086750000 | -1.922238000 |
| H  | 3.041506000  | -2.726948000 | -1.339949000 |
| H  | 2.910916000  | -1.889353000 | -2.850694000 |
| C  | 1.062477000  | -2.788440000 | -2.233217000 |
| H  | 0.649042000  | -2.379873000 | -3.155873000 |
| H  | 1.201330000  | -3.861309000 | -2.413996000 |
| C  | 0.028856000  | -2.591392000 | -1.161089000 |
| H  | -0.994795000 | -2.682066000 | -1.502426000 |
| C  | 0.234351000  | -2.701859000 | 0.213665000  |
| H  | -0.645846000 | -2.927991000 | 0.797673000  |
| P  | 0.368747000  | 1.714511000  | -0.956005000 |
| Br | -2.104095000 | -0.247122000 | -1.977725000 |
| P  | -1.215448000 | -0.113934000 | 1.533514000  |
| C  | -0.447649000 | 1.077578000  | 2.695163000  |
| H  | 0.547100000  | 0.727800000  | 2.965397000  |
| H  | -0.336313000 | 2.052371000  | 2.225732000  |
| H  | -1.036238000 | 1.200198000  | 3.603876000  |
| C  | -1.515020000 | -1.496862000 | 2.693529000  |
| H  | -2.141513000 | -2.253113000 | 2.226478000  |
| H  | -0.575352000 | -1.964778000 | 2.979432000  |
| H  | -2.018786000 | -1.143433000 | 3.592208000  |
| C  | -2.910955000 | 0.543406000  | 1.393228000  |
| H  | -3.356988000 | 0.706214000  | 2.373947000  |

|   |              |              |              |
|---|--------------|--------------|--------------|
| H | -2.913952000 | 1.475946000  | 0.836614000  |
| H | -3.515071000 | -0.159688000 | 0.825195000  |
| C | -0.981882000 | 2.882614000  | -0.610418000 |
| H | -1.892286000 | 2.495850000  | -1.063175000 |
| H | -1.138896000 | 2.995519000  | 0.459461000  |
| H | -0.754435000 | 3.861021000  | -1.030537000 |
| C | 1.811797000  | 2.600566000  | -0.275456000 |
| H | 1.846373000  | 3.622483000  | -0.648929000 |
| H | 1.769206000  | 2.625194000  | 0.811177000  |
| H | 2.731447000  | 2.096990000  | -0.564899000 |
| C | 0.594905000  | 1.952459000  | -2.743524000 |
| H | -0.276974000 | 1.550624000  | -3.253684000 |
| H | 0.710925000  | 3.008661000  | -2.982794000 |
| H | 1.472901000  | 1.410491000  | -3.083588000 |

48

structure of IM6:P'

|    |              |              |              |
|----|--------------|--------------|--------------|
| Ir | 0.132068000  | -0.520518000 | -0.377632000 |
| C  | 1.526071000  | -3.072446000 | 0.848622000  |
| H  | 2.086680000  | -3.743455000 | 0.197776000  |
| H  | 1.322768000  | -3.649692000 | 1.750533000  |
| C  | 2.364643000  | -1.843477000 | 1.203619000  |
| H  | 2.115721000  | -1.523594000 | 2.218690000  |
| H  | 3.430822000  | -2.096721000 | 1.232386000  |
| C  | 2.109693000  | -0.675213000 | 0.283202000  |
| H  | 2.503865000  | 0.249660000  | 0.697867000  |
| C  | 2.117941000  | -0.772058000 | -1.166011000 |
| H  | 2.525427000  | 0.097202000  | -1.675626000 |
| C  | 2.396150000  | -2.074207000 | -1.899285000 |
| H  | 3.052341000  | -2.712391000 | -1.304192000 |
| H  | 2.951071000  | -1.871350000 | -2.814875000 |
| C  | 1.092604000  | -2.779810000 | -2.241595000 |
| H  | 0.697167000  | -2.365099000 | -3.169037000 |
| H  | 1.241353000  | -3.850234000 | -2.428626000 |
| C  | 0.034139000  | -2.597682000 | -1.189971000 |
| H  | -0.981721000 | -2.692838000 | -1.552557000 |
| C  | 0.212887000  | -2.715072000 | 0.187074000  |
| H  | -0.676055000 | -2.949060000 | 0.754683000  |
| P  | 0.350615000  | 1.704168000  | -0.963598000 |
| Br | -2.125157000 | -0.254851000 | -1.990666000 |
| P  | -1.207463000 | -0.118381000 | 1.524501000  |
| C  | -0.411241000 | 1.072078000  | 2.672085000  |
| H  | 0.580138000  | 0.708864000  | 2.936924000  |
| H  | -0.288026000 | 2.041898000  | 2.195513000  |

|   |              |              |              |
|---|--------------|--------------|--------------|
| H | -0.989626000 | 1.209438000  | 3.585227000  |
| C | -1.484016000 | -1.496463000 | 2.697788000  |
| H | -2.118836000 | -2.256629000 | 2.249404000  |
| H | -0.535700000 | -1.959706000 | 2.962512000  |
| H | -1.965790000 | -1.139588000 | 3.607114000  |
| C | -2.900301000 | 0.553017000  | 1.410175000  |
| H | -3.331091000 | 0.720227000  | 2.396930000  |
| H | -2.898734000 | 1.486422000  | 0.854727000  |
| H | -3.518658000 | -0.143026000 | 0.849300000  |
| C | -0.988524000 | 2.886569000  | -0.610093000 |
| H | -1.907953000 | 2.511234000  | -1.052933000 |
| H | -1.133306000 | 3.005235000  | 0.460891000  |
| H | -0.752290000 | 3.861127000  | -1.034208000 |
| C | 1.801006000  | 2.583868000  | -0.282992000 |
| H | 1.841535000  | 3.604064000  | -0.660406000 |
| H | 1.756449000  | 2.614285000  | 0.803375000  |
| H | 2.718827000  | 2.074586000  | -0.567627000 |
| C | 0.574161000  | 1.946466000  | -2.752227000 |
| H | -0.303571000 | 1.556487000  | -3.261053000 |
| H | 0.702661000  | 3.002169000  | -2.987226000 |
| H | 1.444918000  | 1.394925000  | -3.095284000 |

47

structure of IM7:P'

|    |             |              |             |
|----|-------------|--------------|-------------|
| Ir | 0.923954000 | 12.816080000 | 5.464336000 |
| C  | 1.953153000 | 10.994853000 | 7.807059000 |
| H  | 2.820050000 | 10.361381000 | 7.635582000 |
| H  | 1.457312000 | 10.580862000 | 8.682391000 |
| C  | 2.376553000 | 12.433244000 | 8.110482000 |
| H  | 1.613293000 | 12.913255000 | 8.723053000 |
| H  | 3.288471000 | 12.446078000 | 8.714357000 |
| C  | 2.568254000 | 13.265775000 | 6.879878000 |
| H  | 2.530926000 | 14.335566000 | 7.062474000 |
| C  | 3.149690000 | 12.846376000 | 5.684070000 |
| H  | 3.489873000 | 13.623622000 | 5.012658000 |
| C  | 3.769556000 | 11.491563000 | 5.441521000 |
| H  | 4.173197000 | 11.095637000 | 6.370255000 |
| H  | 4.624470000 | 11.613689000 | 4.779938000 |
| C  | 2.787962000 | 10.505034000 | 4.805850000 |
| H  | 2.770208000 | 10.657535000 | 3.726623000 |
| H  | 3.129210000 | 9.476034000  | 4.951233000 |
| C  | 1.386358000 | 10.654198000 | 5.313414000 |
| H  | 0.633716000 | 10.224462000 | 4.659201000 |
| C  | 1.010381000 | 10.908164000 | 6.631633000 |

|   |              |              |             |
|---|--------------|--------------|-------------|
| H | -0.016771000 | 10.690384000 | 6.892830000 |
| P | -1.253334000 | 12.400806000 | 4.733614000 |
| P | 0.845294000  | 15.059666000 | 4.827513000 |
| C | -0.040732000 | 16.127207000 | 6.007456000 |
| H | -1.067608000 | 15.798777000 | 6.135015000 |
| H | 0.446079000  | 16.080886000 | 6.978499000 |
| H | -0.040898000 | 17.160869000 | 5.666452000 |
| C | 2.443196000  | 15.922382000 | 4.673613000 |
| H | 2.272076000  | 16.978050000 | 4.473182000 |
| H | 3.032896000  | 15.838994000 | 5.582497000 |
| H | 3.019651000  | 15.508309000 | 3.850403000 |
| C | 0.099100000  | 15.484508000 | 3.220353000 |
| H | 0.629767000  | 14.972987000 | 2.421099000 |
| H | -0.946852000 | 15.197264000 | 3.172005000 |
| H | 0.166029000  | 16.557052000 | 3.047711000 |
| C | -2.549761000 | 13.635420000 | 5.073522000 |
| H | -2.633753000 | 13.797119000 | 6.145399000 |
| H | -2.333334000 | 14.589005000 | 4.601576000 |
| H | -3.509778000 | 13.282091000 | 4.701964000 |
| C | -1.376543000 | 12.135873000 | 2.935881000 |
| H | -0.758589000 | 11.288763000 | 2.648427000 |
| H | -2.405568000 | 11.931553000 | 2.645894000 |
| H | -1.023149000 | 13.004746000 | 2.389075000 |
| C | -2.060984000 | 10.904127000 | 5.387964000 |
| H | -3.024673000 | 10.765349000 | 4.902217000 |
| H | -1.459811000 | 10.015904000 | 5.213572000 |
| H | -2.228705000 | 11.001720000 | 6.457420000 |

47

structure of IM7:P

|    |             |              |             |
|----|-------------|--------------|-------------|
| Ir | 0.920091000 | 12.817353000 | 5.456159000 |
| C  | 1.944211000 | 11.014144000 | 7.810513000 |
| H  | 2.804157000 | 10.369605000 | 7.642715000 |
| H  | 1.445723000 | 10.611877000 | 8.689917000 |
| C  | 2.384597000 | 12.449369000 | 8.101748000 |
| H  | 1.636256000 | 12.938135000 | 8.725751000 |
| H  | 3.307000000 | 12.456273000 | 8.689877000 |
| C  | 2.563434000 | 13.274689000 | 6.864422000 |
| H  | 2.532374000 | 14.345600000 | 7.041524000 |
| C  | 3.140212000 | 12.844550000 | 5.667960000 |
| H  | 3.481718000 | 13.616029000 | 4.990110000 |
| C  | 3.762187000 | 11.488186000 | 5.442260000 |
| H  | 4.168603000 | 11.106926000 | 6.376361000 |
| H  | 4.616332000 | 11.602079000 | 4.778076000 |

|   |              |              |             |
|---|--------------|--------------|-------------|
| C | 2.781947000  | 10.490233000 | 4.824474000 |
| H | 2.772795000  | 10.614494000 | 3.741558000 |
| H | 3.117656000  | 9.463784000  | 4.999111000 |
| C | 1.378050000  | 10.657777000 | 5.319749000 |
| H | 0.626955000  | 10.220574000 | 4.668649000 |
| C | 0.999933000  | 10.927151000 | 6.636458000 |
| H | -0.027589000 | 10.711481000 | 6.899167000 |
| P | -1.259418000 | 12.391099000 | 4.721647000 |
| P | 0.846574000  | 15.069332000 | 4.826561000 |
| C | -0.018591000 | 16.122273000 | 6.031170000 |
| H | -1.045718000 | 15.797342000 | 6.166449000 |
| H | 0.479799000  | 16.055603000 | 6.995361000 |
| H | -0.016744000 | 17.161967000 | 5.708967000 |
| C | 2.446910000  | 15.922451000 | 4.664578000 |
| H | 2.281491000  | 16.980604000 | 4.472496000 |
| H | 3.044192000  | 15.829420000 | 5.567703000 |
| H | 3.014029000  | 15.509772000 | 3.834094000 |
| C | 0.086595000  | 15.508411000 | 3.232612000 |
| H | 0.617145000  | 15.010331000 | 2.424586000 |
| H | -0.956824000 | 15.211890000 | 3.186582000 |
| H | 0.143866000  | 16.583283000 | 3.071119000 |
| C | -2.555841000 | 13.619786000 | 5.068070000 |
| H | -2.646618000 | 13.763391000 | 6.142149000 |
| H | -2.333343000 | 14.581079000 | 4.614969000 |
| H | -3.514285000 | 13.274895000 | 4.684520000 |
| C | -1.369932000 | 12.129823000 | 2.924962000 |
| H | -0.748594000 | 11.283303000 | 2.642312000 |
| H | -2.395968000 | 11.924664000 | 2.625048000 |
| H | -1.011301000 | 12.999173000 | 2.382193000 |
| C | -2.059372000 | 10.889531000 | 5.369868000 |
| H | -3.019477000 | 10.743546000 | 4.879059000 |
| H | -1.451398000 | 10.005118000 | 5.198979000 |
| H | -2.233986000 | 10.984820000 | 6.438546000 |

60

structure of 2:P

|    |             |              |             |
|----|-------------|--------------|-------------|
| Ir | 0.597481000 | 12.930079000 | 5.706627000 |
| C  | 2.041035000 | 10.713390000 | 7.423497000 |
| H  | 2.774776000 | 10.037502000 | 6.983958000 |
| H  | 1.697924000 | 10.206221000 | 8.324369000 |
| C  | 2.688185000 | 12.046323000 | 7.796742000 |
| H  | 2.253205000 | 12.406645000 | 8.731797000 |
| H  | 3.752929000 | 11.913830000 | 8.013404000 |
| C  | 2.491436000 | 13.114605000 | 6.750068000 |

|   |              |              |             |
|---|--------------|--------------|-------------|
| H | 2.658356000  | 14.116686000 | 7.130167000 |
| C | 2.773944000  | 12.906823000 | 5.362090000 |
| H | 3.098368000  | 13.778836000 | 4.807520000 |
| C | 3.376023000  | 11.614448000 | 4.841983000 |
| H | 3.947281000  | 11.134645000 | 5.636684000 |
| H | 4.101024000  | 11.839240000 | 4.061926000 |
| C | 2.303217000  | 10.691199000 | 4.303855000 |
| H | 2.103707000  | 10.940153000 | 3.260573000 |
| H | 2.621680000  | 9.642642000  | 4.301184000 |
| C | 1.015223000  | 10.819578000 | 5.064769000 |
| H | 0.173677000  | 10.396123000 | 4.529881000 |
| C | 0.871621000  | 10.856197000 | 6.467025000 |
| H | -0.073192000 | 10.479065000 | 6.840134000 |
| P | -1.243398000 | 12.505523000 | 4.287295000 |
| P | 0.730143000  | 15.152995000 | 4.975278000 |
| P | -0.681658000 | 13.445914000 | 7.685035000 |
| C | 0.120571000  | 14.685196000 | 8.755036000 |
| H | 1.124293000  | 14.357067000 | 9.014832000 |
| H | 0.206386000  | 15.637985000 | 8.237196000 |
| H | -0.443517000 | 14.843120000 | 9.672732000 |
| C | -2.384066000 | 14.105835000 | 7.608402000 |
| H | -2.419797000 | 15.029882000 | 7.037609000 |
| H | -3.048471000 | 13.387829000 | 7.132650000 |
| H | -2.764705000 | 14.306428000 | 8.608964000 |
| C | -0.923335000 | 12.074497000 | 8.858972000 |
| H | 0.033472000  | 11.637212000 | 9.132986000 |
| H | -1.419200000 | 12.424083000 | 9.762856000 |
| H | -1.533850000 | 11.293327000 | 8.411712000 |
| C | 0.966615000  | 15.359266000 | 3.181965000 |
| H | 1.821503000  | 14.771608000 | 2.856139000 |
| H | 0.092592000  | 15.000973000 | 2.643126000 |
| H | 1.129985000  | 16.402895000 | 2.918233000 |
| C | -0.619827000 | 16.330454000 | 5.321406000 |
| H | -1.577402000 | 15.986338000 | 4.948171000 |
| H | -0.707525000 | 16.485394000 | 6.394378000 |
| H | -0.396992000 | 17.292107000 | 4.862498000 |
| C | 2.111883000  | 16.135287000 | 5.647685000 |
| H | 2.110574000  | 17.119094000 | 5.182770000 |
| H | 1.993110000  | 16.264841000 | 6.720744000 |
| H | 3.076980000  | 15.672707000 | 5.466607000 |
| C | -2.495457000 | 13.784584000 | 3.933258000 |
| H | -2.909709000 | 14.194652000 | 4.850081000 |
| H | -2.070179000 | 14.596643000 | 3.349049000 |

|   |              |              |             |
|---|--------------|--------------|-------------|
| H | -3.308039000 | 13.349386000 | 3.354320000 |
| C | -0.880700000 | 11.964382000 | 2.582234000 |
| H | -0.334647000 | 12.744624000 | 2.057247000 |
| H | -0.263688000 | 11.070823000 | 2.575984000 |
| H | -1.799136000 | 11.754871000 | 2.036395000 |
| C | -2.334545000 | 11.174205000 | 4.897023000 |
| H | -3.112430000 | 10.942523000 | 4.171926000 |
| H | -1.778887000 | 10.264254000 | 5.106296000 |
| H | -2.811317000 | 11.491335000 | 5.822298000 |

32

structure of 1:Cl

|    |              |              |             |
|----|--------------|--------------|-------------|
| Ir | 1.139281000  | 12.502556000 | 4.339463000 |
| C  | 1.450852000  | 10.876260000 | 7.056422000 |
| H  | 2.383603000  | 10.336335000 | 7.206560000 |
| H  | 0.731647000  | 10.421156000 | 7.733732000 |
| C  | 1.615765000  | 12.351036000 | 7.400225000 |
| H  | 0.653166000  | 12.771088000 | 7.693677000 |
| H  | 2.265416000  | 12.487388000 | 8.269182000 |
| C  | 2.159751000  | 13.155458000 | 6.259043000 |
| H  | 1.979330000  | 14.222382000 | 6.322521000 |
| C  | 3.154959000  | 12.761652000 | 5.368831000 |
| H  | 3.602808000  | 13.553528000 | 4.784681000 |
| C  | 3.951158000  | 11.483616000 | 5.446249000 |
| H  | 4.119595000  | 11.244938000 | 6.495914000 |
| H  | 4.932907000  | 11.679020000 | 5.023641000 |
| C  | 3.328453000  | 10.289660000 | 4.707866000 |
| H  | 3.758969000  | 10.211491000 | 3.715252000 |
| H  | 3.574205000  | 9.357944000  | 5.223758000 |
| C  | 1.841232000  | 10.373134000 | 4.570486000 |
| H  | 1.419594000  | 9.867918000  | 3.710097000 |
| C  | 0.984989000  | 10.667025000 | 5.634540000 |
| H  | -0.050404000 | 10.370294000 | 5.517509000 |
| C  | -0.301349000 | 14.138735000 | 4.824850000 |
| C  | -0.953395000 | 12.875424000 | 4.887999000 |
| C  | 0.206551000  | 14.322732000 | 3.514108000 |
| H  | -0.171529000 | 14.814946000 | 5.653801000 |
| C  | -0.911471000 | 12.289992000 | 3.574329000 |
| H  | -1.442643000 | 12.461152000 | 5.753852000 |
| C  | -0.203561000 | 13.181511000 | 2.739347000 |
| H  | 0.758992000  | 15.170883000 | 3.148212000 |
| H  | -1.340519000 | 11.346737000 | 3.280306000 |
| H  | 0.065968000  | 13.001517000 | 1.712011000 |
| Cl | 2.715975000  | 12.396520000 | 2.501703000 |



structure of TS\_1\_IM1:Cl

|    |              |              |              |
|----|--------------|--------------|--------------|
| Ir | 1.334935000  | 12.550393000 | 4.566166000  |
| C  | 1.637223000  | 11.479036000 | 7.530776000  |
| H  | 2.182607000  | 10.545738000 | 7.658369000  |
| H  | 1.042185000  | 11.598599000 | 8.433756000  |
| C  | 2.596653000  | 12.653233000 | 7.388842000  |
| H  | 2.109063000  | 13.565976000 | 7.733630000  |
| H  | 3.472645000  | 12.531241000 | 8.032258000  |
| C  | 3.046587000  | 12.860875000 | 5.971706000  |
| H  | 3.426537000  | 13.853574000 | 5.754719000  |
| C  | 3.402876000  | 11.858337000 | 5.066404000  |
| H  | 3.981707000  | 12.177838000 | 4.210656000  |
| C  | 3.477952000  | 10.383376000 | 5.384546000  |
| H  | 3.824831000  | 10.263757000 | 6.410752000  |
| H  | 4.250792000  | 9.945210000  | 4.758273000  |
| C  | 2.167002000  | 9.618603000  | 5.156908000  |
| H  | 2.175088000  | 9.178546000  | 4.164525000  |
| H  | 2.084865000  | 8.787694000  | 5.862716000  |
| C  | 0.941666000  | 10.475756000 | 5.272906000  |
| H  | 0.083484000  | 10.138891000 | 4.704303000  |
| C  | 0.710245000  | 11.350037000 | 6.341749000  |
| H  | -0.320436000 | 11.630121000 | 6.521323000  |
| C  | 1.386678000  | 14.518425000 | 3.601553000  |
| C  | 0.894495000  | 14.649146000 | 4.941784000  |
| C  | 0.336446000  | 13.921017000 | 2.796930000  |
| H  | 2.266879000  | 14.998286000 | 3.208448000  |
| C  | -0.309425000 | 13.901217000 | 5.036639000  |
| H  | 1.355790000  | 15.206092000 | 5.740224000  |
| C  | -0.561025000 | 13.310199000 | 3.760019000  |
| H  | -0.915938000 | 13.791732000 | 5.919982000  |
| H  | -1.414982000 | 12.702167000 | 3.512981000  |
| H  | 0.561788000  | 13.438056000 | 1.860858000  |
| P  | -0.803316000 | 15.809574000 | 1.851264000  |
| O  | -1.725493000 | 16.251176000 | 3.064704000  |
| O  | -1.798421000 | 16.116543000 | 0.624795000  |
| O  | 0.398241000  | 16.847839000 | 1.702602000  |
| C  | -2.807097000 | 17.198357000 | 2.993882000  |
| H  | -3.190817000 | 17.298465000 | 4.002829000  |
| H  | -2.459143000 | 18.165384000 | 2.639109000  |
| H  | -3.587261000 | 16.829639000 | 2.334794000  |
| C  | -1.375996000 | 15.871630000 | -0.724593000 |
| H  | -1.196526000 | 14.810909000 | -0.888070000 |

|    |              |              |              |
|----|--------------|--------------|--------------|
| H  | -2.18520000  | 16.200544000 | -1.366408000 |
| H  | -0.474102000 | 16.434512000 | -0.959788000 |
| C  | 0.217190000  | 18.260078000 | 1.506571000  |
| H  | 0.033041000  | 18.743499000 | 2.463577000  |
| H  | 1.137483000  | 18.643556000 | 1.079875000  |
| H  | -0.609354000 | 18.459437000 | 0.826479000  |
| Cl | 1.930875000  | 11.328856000 | 2.515368000  |

48

structure of IM1:Cl

|    |              |              |             |
|----|--------------|--------------|-------------|
| Ir | 1.454526000  | 12.825495000 | 4.564511000 |
| C  | 0.815988000  | 10.365317000 | 6.441379000 |
| H  | 1.636801000  | 9.678247000  | 6.639177000 |
| H  | -0.091899000 | 9.808181000  | 6.664385000 |
| C  | 0.902775000  | 11.589184000 | 7.344004000 |
| H  | -0.097721000 | 11.994815000 | 7.502488000 |
| H  | 1.270429000  | 11.324891000 | 8.340030000 |
| C  | 1.765281000  | 12.672318000 | 6.759321000 |
| H  | 1.588699000  | 13.662918000 | 7.166086000 |
| C  | 2.995252000  | 12.482138000 | 6.116499000 |
| H  | 3.629998000  | 13.355312000 | 6.043223000 |
| C  | 3.704942000  | 11.153708000 | 5.974866000 |
| H  | 3.499577000  | 10.544252000 | 6.854647000 |
| H  | 4.776097000  | 11.340198000 | 5.990468000 |
| C  | 3.350024000  | 10.401675000 | 4.687973000 |
| H  | 4.062676000  | 10.667090000 | 3.911621000 |
| H  | 3.440849000  | 9.321969000  | 4.835090000 |
| C  | 1.975970000  | 10.722373000 | 4.171768000 |
| H  | 1.840287000  | 10.571037000 | 3.107225000 |
| C  | 0.822225000  | 10.736852000 | 4.972806000 |
| H  | -0.120639000 | 10.598519000 | 4.456953000 |
| C  | 0.942536000  | 14.942931000 | 4.459324000 |
| C  | -0.147374000 | 14.204881000 | 5.026977000 |
| C  | 0.837902000  | 14.869266000 | 2.948549000 |
| H  | 1.465164000  | 15.735164000 | 4.973211000 |
| C  | -0.590221000 | 13.283700000 | 4.037141000 |
| H  | -0.537028000 | 14.293867000 | 6.027989000 |
| C  | 0.227910000  | 13.480127000 | 2.880366000 |
| H  | -1.371840000 | 12.550843000 | 4.157408000 |
| H  | 0.114644000  | 12.931446000 | 1.957750000 |
| H  | 1.823756000  | 14.896966000 | 2.471601000 |
| P  | -0.122367000 | 16.176362000 | 2.193701000 |
| O  | 0.598731000  | 17.520629000 | 2.469859000 |
| O  | -1.568338000 | 16.398897000 | 2.755684000 |

|    |              |              |              |
|----|--------------|--------------|--------------|
| O  | -0.195523000 | 15.809035000 | 0.679213000  |
| C  | -0.016221000 | 18.824483000 | 2.590725000  |
| H  | 0.793163000  | 19.513778000 | 2.796365000  |
| H  | -0.510372000 | 19.100533000 | 1.663585000  |
| H  | -0.728037000 | 18.821650000 | 3.409790000  |
| C  | -2.679841000 | 15.512063000 | 2.504934000  |
| H  | -2.860830000 | 14.921132000 | 3.396924000  |
| H  | -3.541912000 | 16.135491000 | 2.293561000  |
| H  | -2.479282000 | 14.857793000 | 1.659223000  |
| C  | -0.753941000 | 16.670657000 | -0.336672000 |
| H  | -0.062980000 | 17.483283000 | -0.543441000 |
| H  | -0.875364000 | 16.059993000 | -1.222881000 |
| H  | -1.720054000 | 17.062218000 | -0.023871000 |
| Cl | 3.468899000  | 13.279437000 | 3.200136000  |

48

structure of TS\_IM1\_IM2:Cl

|    |              |              |              |
|----|--------------|--------------|--------------|
| Ir | 0.964039000  | -0.614840000 | 0.935535000  |
| C  | 0.300713000  | -3.330624000 | 2.326760000  |
| H  | 1.109402000  | -4.040968000 | 2.493931000  |
| H  | -0.612688000 | -3.921090000 | 2.342081000  |
| C  | 0.255663000  | -2.264601000 | 3.414725000  |
| H  | -0.779125000 | -1.981521000 | 3.607459000  |
| H  | 0.643576000  | -2.630621000 | 4.369633000  |
| C  | 1.011401000  | -1.037101000 | 2.987167000  |
| H  | 0.728378000  | -0.128805000 | 3.514981000  |
| C  | 2.352486000  | -1.075602000 | 2.457537000  |
| H  | 2.935667000  | -0.172660000 | 2.596036000  |
| C  | 3.170786000  | -2.344304000 | 2.321782000  |
| H  | 2.836723000  | -3.090551000 | 3.041276000  |
| H  | 4.207830000  | -2.135521000 | 2.572790000  |
| C  | 3.060841000  | -2.845600000 | 0.890937000  |
| H  | 3.830210000  | -2.375967000 | 0.280118000  |
| H  | 3.217909000  | -3.924648000 | 0.802037000  |
| C  | 1.723201000  | -2.474084000 | 0.315926000  |
| H  | 1.695132000  | -2.447504000 | -0.771835000 |
| C  | 0.456451000  | -2.683046000 | 0.963402000  |
| H  | -0.368808000 | -2.862040000 | 0.284951000  |
| C  | -0.449026000 | 0.850901000  | 0.081111000  |
| C  | -1.239305000 | -0.187117000 | 0.625725000  |
| C  | -0.521696000 | 0.769284000  | -1.433085000 |
| H  | -0.227409000 | 1.779942000  | 0.588673000  |
| C  | -1.792165000 | -0.946493000 | -0.498308000 |
| H  | -1.705514000 | -0.165883000 | 1.600463000  |

|    |              |              |              |
|----|--------------|--------------|--------------|
| C  | -1.412999000 | -0.421237000 | -1.671262000 |
| H  | -2.410972000 | -1.824603000 | -0.388741000 |
| H  | -1.629537000 | -0.801529000 | -2.656379000 |
| Cl | 2.583278000  | 0.859673000  | -0.133291000 |
| H  | 0.473011000  | 0.646925000  | -1.885469000 |
| P  | -1.110536000 | 2.288294000  | -2.157056000 |
| O  | -0.020312000 | 3.377953000  | -2.261328000 |
| O  | -2.267927000 | 2.953209000  | -1.348903000 |
| O  | -1.534491000 | 1.940225000  | -3.606961000 |
| C  | 0.708400000  | 3.939270000  | -1.133350000 |
| H  | 1.294525000  | 4.752846000  | -1.541665000 |
| H  | 0.005981000  | 4.320848000  | -0.397084000 |
| H  | 1.361507000  | 3.176192000  | -0.711475000 |
| C  | -3.494954000 | 2.264618000  | -1.010149000 |
| H  | -3.310718000 | 1.576273000  | -0.190273000 |
| H  | -4.195715000 | 3.032268000  | -0.704904000 |
| H  | -3.883622000 | 1.728138000  | -1.872696000 |
| C  | -1.918854000 | 2.946929000  | -4.578958000 |
| H  | -1.057498000 | 3.557318000  | -4.830707000 |
| H  | -2.262954000 | 2.402815000  | -5.449216000 |
| H  | -2.720285000 | 3.564636000  | -4.181940000 |

48

structure of IM2:Cl

|    |             |              |             |
|----|-------------|--------------|-------------|
| Ir | 0.187029000 | 12.944577000 | 5.352109000 |
| C  | 1.451518000 | 10.346071000 | 6.408242000 |
| H  | 2.489901000 | 10.126857000 | 6.168847000 |
| H  | 1.016124000 | 9.396715000  | 6.712260000 |
| C  | 1.350592000 | 11.340366000 | 7.567497000 |
| H  | 0.426809000 | 11.158152000 | 8.117826000 |
| H  | 2.156459000 | 11.185187000 | 8.291033000 |
| C  | 1.350477000 | 12.777305000 | 7.113949000 |
| H  | 0.988413000 | 13.471567000 | 7.868957000 |
| C  | 2.184312000 | 13.312072000 | 6.105534000 |
| H  | 2.367726000 | 14.376209000 | 6.173779000 |
| C  | 3.268071000 | 12.539839000 | 5.380402000 |
| H  | 3.667887000 | 11.762547000 | 6.028833000 |
| H  | 4.104681000 | 13.206966000 | 5.180424000 |
| C  | 2.768022000 | 11.950770000 | 4.060475000 |
| H  | 2.872364000 | 12.691180000 | 3.266924000 |
| H  | 3.385207000 | 11.101997000 | 3.751420000 |
| C  | 1.330698000 | 11.535817000 | 4.119732000 |
| H  | 0.806661000 | 11.519448000 | 3.169948000 |
| C  | 0.722090000 | 10.846311000 | 5.182012000 |

|    |              |              |             |
|----|--------------|--------------|-------------|
| H  | -0.209882000 | 10.346421000 | 4.939984000 |
| C  | -0.630613000 | 14.918851000 | 5.695859000 |
| C  | 0.038280000  | 14.971232000 | 4.438674000 |
| H  | -1.704510000 | 14.780129000 | 5.746460000 |
| H  | -0.431911000 | 14.727006000 | 3.496867000 |
| Cl | -1.784649000 | 12.519284000 | 4.146427000 |
| C  | 1.152247000  | 15.896440000 | 4.535189000 |
| C  | 1.181854000  | 16.474886000 | 5.744690000 |
| C  | 0.064256000  | 15.932967000 | 6.596782000 |
| H  | 1.922110000  | 17.164035000 | 6.121753000 |
| P  | -1.099131000 | 17.189548000 | 7.087828000 |
| O  | -0.258840000 | 18.293772000 | 7.779420000 |
| O  | -1.965101000 | 17.737374000 | 5.917823000 |
| O  | -2.130443000 | 16.691377000 | 8.130871000 |
| C  | -0.851283000 | 19.455525000 | 8.416336000 |
| C  | -1.454704000 | 18.319732000 | 4.694128000 |
| C  | -3.290396000 | 15.865986000 | 7.852393000 |
| H  | -0.022854000 | 20.084575000 | 8.715909000 |
| H  | -1.421958000 | 19.143565000 | 9.285290000 |
| H  | -1.487766000 | 19.984807000 | 7.712028000 |
| H  | -1.252820000 | 17.527132000 | 3.980981000 |
| H  | -0.551484000 | 18.893124000 | 4.888308000 |
| H  | -2.237211000 | 18.970393000 | 4.321965000 |
| H  | -3.741958000 | 16.155214000 | 6.908172000 |
| H  | -3.982688000 | 16.038982000 | 8.667084000 |
| H  | -2.990967000 | 14.822411000 | 7.832958000 |
| H  | 0.442596000  | 15.529142000 | 7.543767000 |
| H  | 1.866078000  | 16.074112000 | 3.744355000 |

32

structure of TS\_1\_IM8:Cl

|    |              |              |              |
|----|--------------|--------------|--------------|
| Ir | -0.940521000 | 0.569494000  | -1.180844000 |
| C  | -2.525915000 | 0.783086000  | -2.550639000 |
| C  | -2.380461000 | 2.018217000  | -1.853210000 |
| C  | -2.870897000 | -0.244823000 | -1.596799000 |
| H  | -2.380185000 | 0.631522000  | -3.608220000 |
| C  | -2.579159000 | 1.741374000  | -0.466272000 |
| H  | -2.094635000 | 2.964349000  | -2.280408000 |
| C  | -2.919483000 | 0.357788000  | -0.314560000 |
| H  | -2.472477000 | 2.451973000  | 0.338090000  |
| H  | -3.127746000 | -0.139057000 | 0.618022000  |
| H  | -3.050471000 | -1.282014000 | -1.827582000 |
| C  | 0.567198000  | -1.221530000 | -0.744581000 |
| C  | -0.350783000 | -1.154992000 | 0.289374000  |

|    |              |              |              |
|----|--------------|--------------|--------------|
| H  | 0.216367000  | -1.780598000 | -1.609038000 |
| C  | 2.056553000  | -1.055833000 | -0.687496000 |
| C  | -0.138631000 | -0.645424000 | 1.681681000  |
| H  | -1.242679000 | -1.758797000 | 0.162956000  |
| H  | 2.364025000  | -0.066458000 | -1.023158000 |
| H  | 2.446995000  | -1.732781000 | -1.446623000 |
| C  | 2.729029000  | -1.377338000 | 0.656561000  |
| C  | 0.587017000  | 0.694301000  | 1.835509000  |
| H  | 0.375337000  | -1.417193000 | 2.260643000  |
| H  | -1.120223000 | -0.560862000 | 2.147886000  |
| H  | 2.184638000  | -2.174894000 | 1.167162000  |
| H  | 3.698506000  | -1.813429000 | 0.428247000  |
| C  | 2.955031000  | -0.201521000 | 1.559719000  |
| H  | 0.324371000  | 1.353055000  | 0.988399000  |
| H  | 0.156310000  | 1.202843000  | 2.697858000  |
| C  | 2.067638000  | 0.680577000  | 2.010785000  |
| H  | 3.986053000  | -0.030901000 | 1.842952000  |
| H  | 2.451664000  | 1.508984000  | 2.593024000  |
| Cl | 0.897222000  | 1.629130000  | -2.015847000 |

32

structure of IM8:Cl

|    |              |              |             |
|----|--------------|--------------|-------------|
| Ir | 0.927332000  | 12.679854000 | 4.344556000 |
| C  | 1.467787000  | 14.767487000 | 4.291456000 |
| C  | 0.128033000  | 14.652374000 | 4.705854000 |
| C  | 1.579965000  | 14.159528000 | 2.981558000 |
| H  | 2.281180000  | 15.175313000 | 4.869127000 |
| C  | -0.600752000 | 13.969021000 | 3.657513000 |
| H  | -0.272978000 | 14.954920000 | 5.659374000 |
| C  | 0.287038000  | 13.729322000 | 2.570486000 |
| H  | -1.645933000 | 13.706434000 | 3.690588000 |
| H  | 0.040083000  | 13.247056000 | 1.639181000 |
| H  | 2.489432000  | 14.068384000 | 2.409804000 |
| C  | 1.502089000  | 10.698489000 | 3.217600000 |
| C  | 0.195990000  | 10.530651000 | 3.641433000 |
| H  | 1.607690000  | 11.122288000 | 2.221629000 |
| C  | 2.750896000  | 10.059088000 | 3.737438000 |
| C  | -0.358677000 | 9.649430000  | 4.719068000 |
| H  | -0.555087000 | 10.899993000 | 2.949035000 |
| H  | 2.733983000  | 9.947675000  | 4.813481000 |
| H  | 3.597370000  | 10.707507000 | 3.510395000 |
| C  | 2.980871000  | 8.706035000  | 3.053854000 |
| C  | 0.550831000  | 8.541918000  | 5.246443000 |
| H  | -1.252778000 | 9.196121000  | 4.282523000 |

|    |              |              |             |
|----|--------------|--------------|-------------|
| H  | -0.739959000 | 10.253117000 | 5.545274000 |
| H  | 3.084748000  | 8.859907000  | 1.976709000 |
| H  | 3.958677000  | 8.333973000  | 3.370578000 |
| C  | 1.949548000  | 7.651156000  | 3.282801000 |
| H  | 1.397616000  | 8.968075000  | 5.777087000 |
| H  | -0.013845000 | 8.002048000  | 6.004619000 |
| C  | 0.964741000  | 7.571964000  | 4.174764000 |
| H  | 2.047565000  | 6.809029000  | 2.606892000 |
| H  | 0.349380000  | 6.681574000  | 4.118490000 |
| Cl | 1.589847000  | 11.867082000 | 6.352229000 |

54

structure of IM6:Cl'

|    |              |              |              |
|----|--------------|--------------|--------------|
| Ir | 0.124160000  | -0.585735000 | -0.516432000 |
| C  | 1.557611000  | -3.007539000 | 1.008451000  |
| H  | 2.185095000  | -3.688882000 | 0.435316000  |
| H  | 1.348768000  | -3.514154000 | 1.950021000  |
| C  | 2.298943000  | -1.700877000 | 1.287674000  |
| H  | 1.935992000  | -1.281849000 | 2.228434000  |
| H  | 3.367504000  | -1.890179000 | 1.440123000  |
| C  | 2.088709000  | -0.654189000 | 0.225716000  |
| H  | 2.424838000  | 0.321406000  | 0.555513000  |
| C  | 2.158047000  | -0.881113000 | -1.204714000 |
| H  | 2.573773000  | -0.050124000 | -1.764965000 |
| C  | 2.452396000  | -2.238282000 | -1.820900000 |
| H  | 3.116860000  | -2.812473000 | -1.172366000 |
| H  | 3.007530000  | -2.104306000 | -2.748915000 |
| C  | 1.169361000  | -3.004250000 | -2.121256000 |
| H  | 0.757708000  | -2.644288000 | -3.064967000 |
| H  | 1.358698000  | -4.074428000 | -2.262966000 |
| C  | 0.095974000  | -2.823399000 | -1.087508000 |
| H  | -0.916569000 | -2.919843000 | -1.459381000 |
| C  | 0.254985000  | -2.800519000 | 0.279074000  |
| H  | -0.641323000 | -2.901546000 | 0.872470000  |
| P  | 0.248402000  | 1.603757000  | -0.927324000 |
| O  | -0.870669000 | 2.609462000  | -0.365305000 |
| O  | 0.246800000  | 2.118633000  | -2.446895000 |
| O  | 1.540701000  | 2.267326000  | -0.250551000 |
| C  | -2.149569000 | 2.687879000  | -1.010518000 |
| C  | 0.814219000  | 1.367380000  | -3.520251000 |
| C  | 1.722427000  | 3.683625000  | -0.286043000 |
| H  | -2.863812000 | 3.002291000  | -0.254757000 |
| H  | -2.106089000 | 3.423698000  | -1.811173000 |
| H  | -2.442512000 | 1.723254000  | -1.425892000 |

|    |              |              |              |
|----|--------------|--------------|--------------|
| H  | 0.33972000   | 1.719934000  | -4.430713000 |
| H  | 1.888112000  | 1.548095000  | -3.574356000 |
| H  | 0.608618000  | 0.305128000  | -3.398699000 |
| H  | 1.066748000  | 4.166513000  | 0.436284000  |
| H  | 2.758592000  | 3.875912000  | -0.025302000 |
| H  | 1.516389000  | 4.084149000  | -1.277870000 |
| Cl | -1.698281000 | -0.598314000 | -2.431340000 |
| P  | -1.159572000 | -0.081165000 | 1.274939000  |
| O  | -1.418418000 | -1.309721000 | 2.313196000  |
| O  | -2.597221000 | 0.694665000  | 1.286374000  |
| O  | -0.357772000 | 0.991632000  | 2.190001000  |
| C  | -1.940847000 | -1.036415000 | 3.608626000  |
| C  | -3.667778000 | 0.076682000  | 0.566827000  |
| C  | -0.931748000 | 2.140456000  | 2.802064000  |
| H  | -2.168003000 | -1.990222000 | 4.075474000  |
| H  | -1.206395000 | -0.506796000 | 4.216029000  |
| H  | -2.851731000 | -0.438690000 | 3.551146000  |
| H  | -3.332644000 | -0.279983000 | -0.409674000 |
| H  | -4.080819000 | -0.755952000 | 1.138406000  |
| H  | -4.439301000 | 0.830563000  | 0.435131000  |
| H  | -1.738070000 | 1.881359000  | 3.487839000  |
| H  | -0.132080000 | 2.625024000  | 3.356960000  |
| H  | -1.316453000 | 2.826410000  | 2.048940000  |

32

structure of 1:I

|    |             |              |             |
|----|-------------|--------------|-------------|
| Ir | 1.140140000 | 12.506731000 | 4.360392000 |
| C  | 1.440546000 | 10.848350000 | 7.037968000 |
| H  | 2.373979000 | 10.307045000 | 7.181825000 |
| H  | 0.719237000 | 10.379585000 | 7.703522000 |
| C  | 1.603205000 | 12.316755000 | 7.404381000 |
| H  | 0.640836000 | 12.730689000 | 7.706686000 |
| H  | 2.257037000 | 12.443590000 | 8.271709000 |
| C  | 2.139590000 | 13.135726000 | 6.268845000 |
| H  | 1.964814000 | 14.202047000 | 6.354733000 |
| C  | 3.152236000 | 12.761396000 | 5.381799000 |
| H  | 3.628516000 | 13.576699000 | 4.855515000 |
| C  | 3.959881000 | 11.487317000 | 5.461631000 |
| H  | 4.141341000 | 11.262909000 | 6.512865000 |
| H  | 4.936238000 | 11.686560000 | 5.027593000 |
| C  | 3.338118000 | 10.278930000 | 4.746330000 |
| H  | 3.808832000 | 10.148060000 | 3.776902000 |
| H  | 3.538378000 | 9.361661000  | 5.306322000 |
| C  | 1.856551000 | 10.392958000 | 4.548190000 |



|   |              |              |             |
|---|--------------|--------------|-------------|
| H | 1.453896000  | 9.873089000  | 3.687479000 |
| C | 0.982460000  | 10.670416000 | 5.608845000 |
| H | -0.048876000 | 10.364243000 | 5.480928000 |
| C | -0.303112000 | 14.181981000 | 4.806126000 |
| C | -0.955486000 | 12.922985000 | 4.924390000 |
| C | 0.184722000  | 14.314690000 | 3.485478000 |
| H | -0.156813000 | 14.887818000 | 5.606980000 |
| C | -0.932482000 | 12.290813000 | 3.634639000 |
| H | -1.431605000 | 12.538250000 | 5.810971000 |
| C | -0.241914000 | 13.149920000 | 2.752447000 |
| H | 0.730339000  | 15.149885000 | 3.081179000 |
| H | -1.371957000 | 11.340522000 | 3.381382000 |
| H | -0.034592000 | 12.955706000 | 1.714014000 |
| I | 2.906241000  | 12.516702000 | 2.188105000 |

48

structure of TS\_1\_IM1:I

|    |              |              |             |
|----|--------------|--------------|-------------|
| Ir | 1.356742000  | 12.532996000 | 4.534831000 |
| C  | 1.570448000  | 11.503929000 | 7.509587000 |
| H  | 2.117161000  | 10.575635000 | 7.668649000 |
| H  | 0.946321000  | 11.633482000 | 8.391266000 |
| C  | 2.528603000  | 12.679753000 | 7.378570000 |
| H  | 2.027633000  | 13.595165000 | 7.696408000 |
| H  | 3.386836000  | 12.570836000 | 8.047934000 |
| C  | 3.016879000  | 12.868692000 | 5.970915000 |
| H  | 3.408596000  | 13.857485000 | 5.756542000 |
| C  | 3.415714000  | 11.853830000 | 5.091857000 |
| H  | 4.054437000  | 12.168652000 | 4.278118000 |
| C  | 3.502873000  | 10.385556000 | 5.447081000 |
| H  | 3.852110000  | 10.298692000 | 6.476446000 |
| H  | 4.281404000  | 9.939622000  | 4.832918000 |
| C  | 2.200893000  | 9.597875000  | 5.245876000 |
| H  | 2.242792000  | 9.064848000  | 4.300392000 |
| H  | 2.094266000  | 8.834112000  | 6.021255000 |
| C  | 0.969689000  | 10.458270000 | 5.248436000 |
| H  | 0.136342000  | 10.083752000 | 4.666857000 |
| C  | 0.685526000  | 11.352041000 | 6.291365000 |
| H  | -0.354874000 | 11.618281000 | 6.431617000 |
| C  | 1.401818000  | 14.498543000 | 3.541385000 |
| C  | 0.901873000  | 14.645063000 | 4.875224000 |
| C  | 0.337893000  | 13.922666000 | 2.732283000 |
| H  | 2.279784000  | 14.982350000 | 3.147673000 |
| C  | -0.298167000 | 13.892764000 | 4.972572000 |
| H  | 1.361065000  | 15.206684000 | 5.671462000 |

|   |              |              |              |
|---|--------------|--------------|--------------|
| C | -0.540103000 | 13.287514000 | 3.700533000  |
| H | -0.907146000 | 13.788153000 | 5.854711000  |
| H | -1.396485000 | 12.681819000 | 3.455210000  |
| H | 0.545086000  | 13.468856000 | 1.777864000  |
| P | -0.800801000 | 15.824339000 | 1.877857000  |
| O | -1.688073000 | 16.268248000 | 3.114662000  |
| O | -1.825568000 | 16.130015000 | 0.677083000  |
| O | 0.402416000  | 16.853304000 | 1.696590000  |
| C | -2.766819000 | 17.221288000 | 3.073265000  |
| H | -3.130162000 | 17.313872000 | 4.090362000  |
| H | -2.420158000 | 18.189566000 | 2.720675000  |
| H | -3.561004000 | 16.861921000 | 2.425942000  |
| C | -1.439165000 | 15.880276000 | -0.682617000 |
| H | -1.263950000 | 14.818937000 | -0.846814000 |
| H | -2.265457000 | 16.206684000 | -1.303517000 |
| H | -0.544097000 | 16.442571000 | -0.943532000 |
| C | 0.226202000  | 18.267459000 | 1.506954000  |
| H | 0.071504000  | 18.750493000 | 2.469272000  |
| H | 1.137484000  | 18.644441000 | 1.055983000  |
| H | -0.616997000 | 18.473357000 | 0.849686000  |
| I | 2.091950000  | 11.158472000 | 2.174004000  |

48

structure of IM1:I

|    |              |              |             |
|----|--------------|--------------|-------------|
| Ir | 1.516771000  | 12.829181000 | 4.537496000 |
| C  | 0.762044000  | 10.395535000 | 6.401270000 |
| H  | 1.562749000  | 9.694537000  | 6.632512000 |
| H  | -0.163799000 | 9.858578000  | 6.598326000 |
| C  | 0.845636000  | 11.625034000 | 7.295270000 |
| H  | -0.149494000 | 12.057826000 | 7.410376000 |
| H  | 1.166805000  | 11.361459000 | 8.307548000 |
| C  | 1.759318000  | 12.679183000 | 6.735501000 |
| H  | 1.600683000  | 13.674706000 | 7.137761000 |
| C  | 3.009482000  | 12.453816000 | 6.141071000 |
| H  | 3.674580000  | 13.306682000 | 6.122381000 |
| C  | 3.691424000  | 11.105004000 | 6.044727000 |
| H  | 3.464760000  | 10.532252000 | 6.944418000 |
| H  | 4.766082000  | 11.270602000 | 6.065471000 |
| C  | 3.335039000  | 10.307745000 | 4.784175000 |
| H  | 4.105918000  | 10.458540000 | 4.032687000 |
| H  | 3.325125000  | 9.235232000  | 4.998421000 |
| C  | 2.014048000  | 10.699868000 | 4.182065000 |
| H  | 1.923265000  | 10.530868000 | 3.115717000 |
| C  | 0.827830000  | 10.754599000 | 4.931564000 |

|   |              |              |              |
|---|--------------|--------------|--------------|
| H | -0.097665000 | 10.636348000 | 4.380917000  |
| C | 1.017893000  | 14.955829000 | 4.415155000  |
| C | -0.080661000 | 14.223674000 | 4.978407000  |
| C | 0.882555000  | 14.902531000 | 2.905701000  |
| H | 1.533859000  | 15.752517000 | 4.929069000  |
| C | -0.519958000 | 13.303828000 | 3.985957000  |
| H | -0.474353000 | 14.312522000 | 5.977770000  |
| C | 0.309794000  | 13.497722000 | 2.834223000  |
| H | -1.302836000 | 12.571809000 | 4.102810000  |
| H | 0.190690000  | 12.957989000 | 1.906970000  |
| H | 1.849476000  | 14.979899000 | 2.397454000  |
| P | -0.138257000 | 16.192572000 | 2.194136000  |
| O | 0.564546000  | 17.548548000 | 2.461744000  |
| O | -1.573816000 | 16.386394000 | 2.793635000  |
| O | -0.245159000 | 15.833516000 | 0.679341000  |
| C | -0.070263000 | 18.841271000 | 2.596694000  |
| H | 0.730330000  | 19.543436000 | 2.793014000  |
| H | -0.582518000 | 19.112393000 | 1.677946000  |
| H | -0.769737000 | 18.823688000 | 3.426148000  |
| C | -2.677297000 | 15.484208000 | 2.564140000  |
| H | -2.833082000 | 14.891906000 | 3.460024000  |
| H | -3.551942000 | 16.095271000 | 2.368709000  |
| H | -2.483753000 | 14.831676000 | 1.715428000  |
| C | -0.852113000 | 16.686683000 | -0.315363000 |
| H | -0.182857000 | 17.511872000 | -0.542733000 |
| H | -0.991913000 | 16.075724000 | -1.198694000 |
| H | -1.814169000 | 17.060647000 | 0.029804000  |
| I | 3.858259000  | 13.307389000 | 3.034510000  |

48

structure of TS\_IM1\_IM2:I

|    |              |              |             |
|----|--------------|--------------|-------------|
| Ir | 1.064919000  | -0.595165000 | 0.961103000 |
| C  | 0.239916000  | -3.344323000 | 2.193864000 |
| H  | 1.015216000  | -4.085814000 | 2.383666000 |
| H  | -0.689687000 | -3.905593000 | 2.127965000 |
| C  | 0.156258000  | -2.320996000 | 3.319978000 |
| H  | -0.879902000 | -2.009603000 | 3.452973000 |
| H  | 0.462730000  | -2.741007000 | 4.282324000 |
| C  | 0.979838000  | -1.103619000 | 3.001762000 |
| H  | 0.689464000  | -0.210189000 | 3.550093000 |
| C  | 2.348689000  | -1.161309000 | 2.562205000 |
| H  | 2.948595000  | -0.292299000 | 2.802530000 |
| C  | 3.135023000  | -2.449820000 | 2.420123000 |
| H  | 2.741529000  | -3.208343000 | 3.096087000 |

|   |              |              |              |
|---|--------------|--------------|--------------|
| H | 4.162763000  | -2.281445000 | 2.732623000  |
| C | 3.092941000  | -2.906437000 | 0.970545000  |
| H | 3.921726000  | -2.460513000 | 0.422874000  |
| H | 3.205140000  | -3.989491000 | 0.862545000  |
| C | 1.814327000  | -2.463138000 | 0.318302000  |
| H | 1.863993000  | -2.402012000 | -0.766165000 |
| C | 0.503646000  | -2.655161000 | 0.869447000  |
| H | -0.282249000 | -2.771453000 | 0.133100000  |
| C | -0.287837000 | 0.894617000  | 0.038790000  |
| C | -1.101008000 | -0.082212000 | 0.673903000  |
| C | -0.474978000 | 0.758753000  | -1.464468000 |
| H | -0.046097000 | 1.850998000  | 0.481986000  |
| C | -1.758309000 | -0.856629000 | -0.379857000 |
| H | -1.527955000 | 0.023051000  | 1.662044000  |
| C | -1.424833000 | -0.404004000 | -1.595459000 |
| H | -2.408895000 | -1.698540000 | -0.193438000 |
| H | -1.711306000 | -0.819407000 | -2.548200000 |
| I | 3.055444000  | 0.946460000  | -0.141596000 |
| H | 0.467457000  | 0.595933000  | -2.003426000 |
| P | -1.108723000 | 2.266061000  | -2.177168000 |
| O | -0.043269000 | 3.375198000  | -2.335253000 |
| O | -2.243015000 | 2.927037000  | -1.334914000 |
| O | -1.575496000 | 1.892498000  | -3.607889000 |
| C | 0.589128000  | 4.099918000  | -1.246455000 |
| H | 1.070668000  | 4.955547000  | -1.703271000 |
| H | -0.162806000 | 4.430720000  | -0.535287000 |
| H | 1.331448000  | 3.457294000  | -0.775262000 |
| C | -3.462135000 | 2.252126000  | -0.945364000 |
| H | -3.272061000 | 1.647094000  | -0.064111000 |
| H | -4.179039000 | 3.032290000  | -0.718449000 |
| H | -3.832836000 | 1.628929000  | -1.755847000 |
| C | -2.015883000 | 2.878674000  | -4.576515000 |
| H | -1.178470000 | 3.506682000  | -4.863335000 |
| H | -2.375406000 | 2.317154000  | -5.429338000 |
| H | -2.818661000 | 3.481488000  | -4.159762000 |

48

structure of IM2:I

|    |             |              |             |
|----|-------------|--------------|-------------|
| Ir | 0.148042000 | 12.941225000 | 5.346217000 |
| C  | 1.456761000 | 10.353368000 | 6.406675000 |
| H  | 2.504142000 | 10.158163000 | 6.186176000 |
| H  | 1.036441000 | 9.392493000  | 6.695180000 |
| C  | 1.310676000 | 11.334303000 | 7.570746000 |
| H  | 0.376084000 | 11.133761000 | 8.095787000 |

|   |              |              |             |
|---|--------------|--------------|-------------|
| H | 2.100566000  | 11.187193000 | 8.313697000 |
| C | 1.302534000  | 12.772891000 | 7.129288000 |
| H | 0.907937000  | 13.457117000 | 7.877049000 |
| C | 2.148873000  | 13.328760000 | 6.145553000 |
| H | 2.311405000  | 14.394370000 | 6.225864000 |
| C | 3.251019000  | 12.585030000 | 5.422962000 |
| H | 3.655222000  | 11.802198000 | 6.061798000 |
| H | 4.079313000  | 13.268401000 | 5.244020000 |
| C | 2.773409000  | 12.014011000 | 4.087869000 |
| H | 2.867991000  | 12.774682000 | 3.312203000 |
| H | 3.410686000  | 11.185600000 | 3.764046000 |
| C | 1.345223000  | 11.565362000 | 4.124996000 |
| H | 0.849240000  | 11.524903000 | 3.160816000 |
| C | 0.738204000  | 10.846832000 | 5.170788000 |
| H | -0.158380000 | 10.300694000 | 4.899924000 |
| C | -0.630344000 | 14.935273000 | 5.673663000 |
| C | 0.052729000  | 14.962132000 | 4.419429000 |
| H | -1.710505000 | 14.855774000 | 5.707724000 |
| H | -0.419742000 | 14.747407000 | 3.471438000 |
| I | -2.166968000 | 12.373649000 | 4.112632000 |
| C | 1.178121000  | 15.874126000 | 4.514841000 |
| C | 1.204244000  | 16.471070000 | 5.715461000 |
| C | 0.082680000  | 15.943329000 | 6.571458000 |
| H | 1.950279000  | 17.157051000 | 6.087354000 |
| P | -1.075130000 | 17.195573000 | 7.083115000 |
| O | -0.232932000 | 18.298496000 | 7.774101000 |
| O | -1.955359000 | 17.749939000 | 5.926378000 |
| O | -2.093835000 | 16.685837000 | 8.133352000 |
| C | -0.823122000 | 19.457145000 | 8.418583000 |
| C | -1.453447000 | 18.301381000 | 4.685086000 |
| C | -3.226935000 | 15.820519000 | 7.863225000 |
| H | 0.005852000  | 20.089794000 | 8.708948000 |
| H | -1.382178000 | 19.141866000 | 9.293868000 |
| H | -1.470264000 | 19.983881000 | 7.722171000 |
| H | -1.254006000 | 17.491258000 | 3.990886000 |
| H | -0.550625000 | 18.881879000 | 4.859090000 |
| H | -2.239687000 | 18.940465000 | 4.301152000 |
| H | -3.705034000 | 16.104525000 | 6.930287000 |
| H | -3.910939000 | 15.958478000 | 8.691416000 |
| H | -2.890644000 | 14.788294000 | 7.824351000 |
| H | 0.464952000  | 15.532124000 | 7.514321000 |
| H | 1.898746000  | 16.035356000 | 3.726518000 |

structure of TS\_1\_IM8:I

|    |              |              |              |
|----|--------------|--------------|--------------|
| Ir | -0.929823000 | 0.480360000  | -1.263373000 |
| C  | -2.581700000 | 0.925984000  | -2.530133000 |
| C  | -2.346367000 | 2.041676000  | -1.686349000 |
| C  | -2.917515000 | -0.207912000 | -1.700174000 |
| H  | -2.494382000 | 0.912096000  | -3.604127000 |
| C  | -2.505142000 | 1.592961000  | -0.330409000 |
| H  | -2.051723000 | 3.029169000  | -1.998220000 |
| C  | -2.915902000 | 0.227571000  | -0.349921000 |
| H  | -2.354322000 | 2.192936000  | 0.552779000  |
| H  | -3.118698000 | -0.380356000 | 0.515490000  |
| H  | -3.148933000 | -1.199335000 | -2.053444000 |
| C  | 0.592408000  | -1.251593000 | -0.734466000 |
| C  | -0.341660000 | -1.136786000 | 0.285372000  |
| H  | 0.249442000  | -1.860690000 | -1.567522000 |
| C  | 2.090518000  | -1.145789000 | -0.650346000 |
| C  | -0.161423000 | -0.586587000 | 1.669770000  |
| H  | -1.218499000 | -1.764905000 | 0.174475000  |
| H  | 2.464955000  | -0.207676000 | -1.056846000 |
| H  | 2.463560000  | -1.905247000 | -1.337477000 |
| C  | 2.710860000  | -1.380489000 | 0.734267000  |
| C  | 0.562638000  | 0.750591000  | 1.832985000  |
| H  | 0.323313000  | -1.349892000 | 2.283877000  |
| H  | -1.157695000 | -0.482967000 | 2.101518000  |
| H  | 2.125510000  | -2.118028000 | 1.286194000  |
| H  | 3.674094000  | -1.858802000 | 0.573927000  |
| C  | 2.939218000  | -0.134238000 | 1.537333000  |
| H  | 0.261562000  | 1.428701000  | 1.018343000  |
| H  | 0.161089000  | 1.225707000  | 2.728965000  |
| C  | 2.048947000  | 0.760699000  | 1.953020000  |
| H  | 3.975694000  | 0.081895000  | 1.764512000  |
| H  | 2.437263000  | 1.634653000  | 2.462047000  |
| I  | 1.032403000  | 1.614546000  | -2.538476000 |

32

structure of IM8:I

|    |              |              |             |
|----|--------------|--------------|-------------|
| Ir | 0.975630000  | 12.703041000 | 4.361869000 |
| C  | 1.403254000  | 14.818837000 | 4.259238000 |
| C  | 0.065821000  | 14.642080000 | 4.669071000 |
| C  | 1.553797000  | 14.197886000 | 2.962637000 |
| H  | 2.187438000  | 15.287873000 | 4.830139000 |
| C  | -0.624165000 | 13.911693000 | 3.630740000 |
| H  | -0.356612000 | 14.949392000 | 5.611573000 |
| C  | 0.284142000  | 13.695150000 | 2.556396000 |

|   |              |              |             |
|---|--------------|--------------|-------------|
| H | -1.658117000 | 13.608482000 | 3.658581000 |
| H | 0.068199000  | 13.184861000 | 1.632095000 |
| H | 2.466678000  | 14.150817000 | 2.391475000 |
| C | 1.557741000  | 10.713607000 | 3.264038000 |
| C | 0.241426000  | 10.566480000 | 3.670881000 |
| H | 1.681113000  | 11.143022000 | 2.272466000 |
| C | 2.782967000  | 10.010898000 | 3.761011000 |
| C | -0.346634000 | 9.668406000  | 4.720111000 |
| H | -0.493920000 | 10.945746000 | 2.968003000 |
| H | 2.763330000  | 9.859276000  | 4.832504000 |
| H | 3.651713000  | 10.637263000 | 3.559145000 |
| C | 2.964052000  | 8.675785000  | 3.033033000 |
| C | 0.531168000  | 8.527613000  | 5.229732000 |
| H | -1.242783000 | 9.241829000  | 4.261729000 |
| H | -0.729300000 | 10.257840000 | 5.555596000 |
| H | 3.056181000  | 8.859623000  | 1.959245000 |
| H | 3.935158000  | 8.264440000  | 3.320819000 |
| C | 1.908350000  | 7.642226000  | 3.246215000 |
| H | 1.387006000  | 8.919031000  | 5.774504000 |
| H | -0.051298000 | 7.986835000  | 5.973843000 |
| C | 0.925074000  | 7.568687000  | 4.140477000 |
| H | 1.983228000  | 6.810607000  | 2.554505000 |
| H | 0.289808000  | 6.693411000  | 4.069874000 |
| I | 1.862239000  | 12.024078000 | 6.690297000 |

54

structure of IM6:I'

|    |             |              |              |
|----|-------------|--------------|--------------|
| Ir | 0.082088000 | -0.612068000 | -0.576816000 |
| C  | 1.504841000 | -2.975851000 | 1.045007000  |
| H  | 2.161747000 | -3.668860000 | 0.520420000  |
| H  | 1.260857000 | -3.455608000 | 1.992218000  |
| C  | 2.222061000 | -1.655442000 | 1.314699000  |
| H  | 1.822660000 | -1.214564000 | 2.230553000  |
| H  | 3.287078000 | -1.826861000 | 1.508749000  |
| C  | 2.040575000 | -0.638597000 | 0.220637000  |
| H  | 2.340123000 | 0.350776000  | 0.540475000  |
| C  | 2.151521000 | -0.894155000 | -1.197341000 |
| H  | 2.561043000 | -0.066041000 | -1.765762000 |
| C  | 2.498826000 | -2.258812000 | -1.765994000 |
| H  | 3.148536000 | -2.797384000 | -1.073310000 |
| H  | 3.090000000 | -2.136030000 | -2.672875000 |
| C  | 1.250291000 | -3.066714000 | -2.095370000 |
| H  | 0.872224000 | -2.752525000 | -3.069321000 |
| H  | 1.473989000 | -4.135733000 | -2.188460000 |

|                   |              |              |              |
|-------------------|--------------|--------------|--------------|
| C                 | 0.129594000  | -2.883220000 | -1.115354000 |
| H                 | -0.860378000 | -3.050360000 | -1.518955000 |
| C                 | 0.230276000  | -2.807863000 | 0.255750000  |
| H                 | -0.687544000 | -2.927804000 | 0.811432000  |
| P                 | 0.194172000  | 1.580197000  | -0.984822000 |
| O                 | -0.895706000 | 2.589467000  | -0.375128000 |
| O                 | 0.175547000  | 2.141554000  | -2.491262000 |
| O                 | 1.512457000  | 2.220972000  | -0.328907000 |
| C                 | -2.188460000 | 2.736278000  | -0.971122000 |
| C                 | 0.910974000  | 1.500724000  | -3.531077000 |
| C                 | 1.713594000  | 3.633902000  | -0.356268000 |
| H                 | -2.842017000 | 3.140792000  | -0.203253000 |
| H                 | -2.129839000 | 3.423234000  | -1.813163000 |
| H                 | -2.575565000 | 1.779213000  | -1.320810000 |
| H                 | 0.494563000  | 1.848104000  | -4.471061000 |
| H                 | 1.964315000  | 1.779110000  | -3.469862000 |
| H                 | 0.803038000  | 0.417082000  | -3.471488000 |
| H                 | 1.069853000  | 4.121864000  | 0.373504000  |
| H                 | 2.754117000  | 3.809827000  | -0.100885000 |
| H                 | 1.506385000  | 4.044155000  | -1.344097000 |
| I                 | -1.933100000 | -0.726218000 | -2.811593000 |
| P                 | -1.183786000 | -0.098401000 | 1.227497000  |
| O                 | -1.436901000 | -1.330972000 | 2.262340000  |
| O                 | -2.601415000 | 0.711536000  | 1.302925000  |
| O                 | -0.330521000 | 0.952890000  | 2.122697000  |
| C                 | -1.884081000 | -1.060461000 | 3.586115000  |
| C                 | -3.738244000 | 0.112138000  | 0.681591000  |
| C                 | -0.865778000 | 2.086356000  | 2.795121000  |
| H                 | -2.136173000 | -2.011979000 | 4.044989000  |
| H                 | -1.096076000 | -0.580638000 | 4.167414000  |
| H                 | -2.765827000 | -0.417937000 | 3.585449000  |
| H                 | -3.492450000 | -0.270821000 | -0.311304000 |
| H                 | -4.127815000 | -0.701346000 | 1.295464000  |
| H                 | -4.497729000 | 0.884217000  | 0.592788000  |
| H                 | -1.641055000 | 1.813216000  | 3.510521000  |
| H                 | -0.036757000 | 2.548656000  | 3.325457000  |
| H                 | -1.280124000 | 2.797005000  | 2.081845000  |
| 20                |              |              |              |
| structure of bipy |              |              |              |
| C                 | -4.453921000 | -0.479214000 | -0.084857000 |
| C                 | -3.356990000 | -0.289554000 | 0.755667000  |
| C                 | -2.685736000 | 0.917327000  | 0.713534000  |
| C                 | -3.122810000 | 1.899676000  | -0.160950000 |



|   |              |              |              |
|---|--------------|--------------|--------------|
| C | -4.222886000 | 1.620707000  | -0.958380000 |
| N | -4.878817000 | 0.467808000  | -0.930698000 |
| H | -1.831810000 | 1.090724000  | 1.354635000  |
| H | -3.060494000 | -1.089779000 | 1.417082000  |
| H | -2.627266000 | 2.857723000  | -0.226274000 |
| H | -4.595573000 | 2.363930000  | -1.655644000 |
| C | -5.203405000 | -1.753730000 | -0.075559000 |
| C | -6.300331000 | -1.943393000 | -0.916089000 |
| N | -4.778515000 | -2.700748000 | 0.770288000  |
| C | -6.971585000 | -3.150274000 | -0.873956000 |
| H | -6.596823000 | -1.143170000 | -1.577509000 |
| C | -5.434445000 | -3.853647000 | 0.797971000  |
| C | -6.534516000 | -4.132619000 | 0.000535000  |
| H | -7.825506000 | -3.323673000 | -1.515062000 |
| H | -5.061762000 | -4.596867000 | 1.495239000  |
| H | -7.030061000 | -5.090666000 | 0.065859000  |

52

structure of TS\_1\_IM1:bipy

|    |              |              |             |
|----|--------------|--------------|-------------|
| Ir | 1.652128000  | 12.771455000 | 4.688258000 |
| C  | 0.815496000  | 10.446683000 | 6.663162000 |
| H  | 1.596845000  | 9.738034000  | 6.933016000 |
| H  | -0.125592000 | 9.942920000  | 6.873929000 |
| C  | 0.921312000  | 11.713102000 | 7.501673000 |
| H  | -0.062351000 | 12.175836000 | 7.589929000 |
| H  | 1.229017000  | 11.487030000 | 8.526696000 |
| C  | 1.869281000  | 12.714948000 | 6.907619000 |
| H  | 1.724113000  | 13.735881000 | 7.245235000 |
| C  | 3.115276000  | 12.428674000 | 6.340388000 |
| H  | 3.797890000  | 13.263761000 | 6.260986000 |
| C  | 3.760604000  | 11.061601000 | 6.301698000 |
| H  | 3.514090000  | 10.533377000 | 7.222912000 |
| H  | 4.838472000  | 11.201282000 | 6.320869000 |
| C  | 3.394211000  | 10.216322000 | 5.073089000 |
| H  | 4.173488000  | 10.313772000 | 4.323421000 |
| H  | 3.355600000  | 9.156613000  | 5.340114000 |
| C  | 2.087710000  | 10.603494000 | 4.442726000 |
| H  | 2.002616000  | 10.399290000 | 3.382450000 |
| C  | 0.902760000  | 10.734152000 | 5.179743000 |
| H  | -0.024087000 | 10.629859000 | 4.629744000 |
| C  | 1.135266000  | 14.899126000 | 4.564252000 |
| C  | 0.017897000  | 14.138846000 | 5.060658000 |
| C  | 1.237165000  | 14.681300000 | 3.133929000 |
| H  | 1.649100000  | 15.673456000 | 5.110232000 |

|    |              |              |              |
|----|--------------|--------------|--------------|
| C  | -0.371596000 | 13.237907000 | 4.030503000  |
| H  | -0.449248000 | 14.235034000 | 6.026832000  |
| C  | 0.517337000  | 13.426367000 | 2.931129000  |
| H  | -1.168679000 | 12.515986000 | 4.092554000  |
| H  | 0.478609000  | 12.885584000 | 1.999263000  |
| Br | 3.904478000  | 12.971555000 | 3.368084000  |
| H  | 2.149720000  | 14.873455000 | 2.597677000  |
| N  | 0.225808000  | 16.049512000 | 2.184596000  |
| C  | -0.014618000 | 16.011236000 | 0.860012000  |
| C  | -0.372610000 | 16.957138000 | 2.950949000  |
| C  | -0.908301000 | 16.920508000 | 0.298687000  |
| C  | -1.252501000 | 17.894043000 | 2.447924000  |
| H  | -0.132806000 | 16.917510000 | 4.006124000  |
| C  | -1.529179000 | 17.866593000 | 1.091214000  |
| H  | -1.080169000 | 16.895559000 | -0.767251000 |
| H  | -1.704641000 | 18.619812000 | 3.106183000  |
| H  | -2.211573000 | 18.581007000 | 0.653351000  |
| C  | 0.691634000  | 15.027378000 | 0.013858000  |
| C  | 0.054865000  | 14.445688000 | -1.080267000 |
| N  | 1.957608000  | 14.751511000 | 0.341529000  |
| C  | 0.763291000  | 13.543985000 | -1.856592000 |
| H  | -0.976831000 | 14.676107000 | -1.306498000 |
| C  | 2.626694000  | 13.888142000 | -0.413236000 |
| C  | 2.075767000  | 13.259548000 | -1.522301000 |
| H  | 0.294017000  | 13.070277000 | -2.707229000 |
| H  | 3.649026000  | 13.690708000 | -0.113958000 |
| H  | 2.663662000  | 12.564315000 | -2.103183000 |

52

structure of IM1:bipy

|    |              |              |             |
|----|--------------|--------------|-------------|
| Ir | 1.610022000  | 12.832905000 | 4.654930000 |
| C  | 0.781505000  | 10.454936000 | 6.568785000 |
| H  | 1.564353000  | 9.742767000  | 6.824602000 |
| H  | -0.157843000 | 9.942315000  | 6.766682000 |
| C  | 0.879635000  | 11.701839000 | 7.437783000 |
| H  | -0.107409000 | 12.156726000 | 7.532868000 |
| H  | 1.184221000  | 11.452151000 | 8.458518000 |
| C  | 1.821807000  | 12.725073000 | 6.869083000 |
| H  | 1.672959000  | 13.734782000 | 7.238040000 |
| C  | 3.069656000  | 12.459561000 | 6.293815000 |
| H  | 3.749301000  | 13.299274000 | 6.238354000 |
| C  | 3.721733000  | 11.095959000 | 6.224208000 |
| H  | 3.464980000  | 10.536861000 | 7.124047000 |
| H  | 4.799113000  | 11.237378000 | 6.263602000 |

|    |              |              |              |
|----|--------------|--------------|--------------|
| C  | 3.373313000  | 10.293859000 | 4.963401000  |
| H  | 4.146436000  | 10.448028000 | 4.215820000  |
| H  | 3.366834000  | 9.222544000  | 5.182959000  |
| C  | 2.056134000  | 10.679551000 | 4.351833000  |
| H  | 1.969567000  | 10.498419000 | 3.287138000  |
| C  | 0.869536000  | 10.777475000 | 5.091994000  |
| H  | -0.055674000 | 10.674517000 | 4.538317000  |
| C  | 1.143731000  | 14.949672000 | 4.524478000  |
| C  | 0.010075000  | 14.220961000 | 5.033488000  |
| C  | 1.130159000  | 14.866508000 | 3.033396000  |
| H  | 1.667707000  | 15.713353000 | 5.079225000  |
| C  | -0.395270000 | 13.323157000 | 4.005787000  |
| H  | -0.443914000 | 14.315649000 | 6.006492000  |
| C  | 0.503059000  | 13.505828000 | 2.909722000  |
| H  | -1.197680000 | 12.607018000 | 4.072210000  |
| H  | 0.448682000  | 12.950878000 | 1.985410000  |
| Br | 3.840665000  | 13.134698000 | 3.305944000  |
| H  | 2.105932000  | 14.947719000 | 2.572430000  |
| N  | 0.263830000  | 15.969657000 | 2.309687000  |
| C  | 0.046789000  | 15.916528000 | 0.967844000  |
| C  | -0.330173000 | 16.911806000 | 3.059296000  |
| C  | -0.835100000 | 16.825291000 | 0.398094000  |
| C  | -1.185753000 | 17.843941000 | 2.522189000  |
| H  | -0.097672000 | 16.880977000 | 4.112165000  |
| C  | -1.456413000 | 17.791483000 | 1.165136000  |
| H  | -0.993627000 | 16.778250000 | -0.668814000 |
| H  | -1.630315000 | 18.587706000 | 3.164627000  |
| H  | -2.129906000 | 18.501963000 | 0.707978000  |
| C  | 0.751005000  | 14.933661000 | 0.118952000  |
| C  | 0.059258000  | 14.246834000 | -0.874954000 |
| N  | 2.059355000  | 14.784779000 | 0.334696000  |
| C  | 0.763394000  | 13.348752000 | -1.660775000 |
| H  | -1.003088000 | 14.393105000 | -1.014325000 |
| C  | 2.722922000  | 13.927734000 | -0.430227000 |
| C  | 2.118760000  | 13.183324000 | -1.436525000 |
| H  | 0.257754000  | 12.787205000 | -2.433388000 |
| H  | 3.781731000  | 13.830498000 | -0.224339000 |
| H  | 2.701996000  | 12.491428000 | -2.025994000 |

52

structure of TS\_IM1\_IM2:bipy

|    |              |              |             |
|----|--------------|--------------|-------------|
| Ir | 0.990821000  | -0.660512000 | 1.437592000 |
| C  | -0.307047000 | -2.618753000 | 3.478770000 |
| H  | 0.178803000  | -3.568884000 | 3.699678000 |

|    |              |              |              |
|----|--------------|--------------|--------------|
| H  | -1.353780000 | -2.758756000 | 3.741604000  |
| C  | 0.290393000  | -1.479622000 | 4.297926000  |
| H  | -0.495699000 | -0.771241000 | 4.560877000  |
| H  | 0.701812000  | -1.828784000 | 5.249045000  |
| C  | 1.343679000  | -0.742737000 | 3.515104000  |
| H  | 1.531501000  | 0.270248000  | 3.861966000  |
| C  | 2.426721000  | -1.397588000 | 2.836857000  |
| H  | 3.314794000  | -0.798440000 | 2.676120000  |
| C  | 2.668593000  | -2.891801000 | 2.897585000  |
| H  | 2.233209000  | -3.306917000 | 3.806039000  |
| H  | 3.736670000  | -3.083570000 | 2.965998000  |
| C  | 2.090415000  | -3.533575000 | 1.649209000  |
| H  | 2.835281000  | -3.522184000 | 0.855240000  |
| H  | 1.813196000  | -4.582003000 | 1.794653000  |
| C  | 0.899832000  | -2.751258000 | 1.172263000  |
| H  | 0.666144000  | -2.899071000 | 0.121271000  |
| C  | -0.199895000 | -2.324077000 | 1.994575000  |
| H  | -1.150003000 | -2.259837000 | 1.476601000  |
| C  | -0.065193000 | 1.056714000  | 0.517254000  |
| C  | -0.741571000 | 0.661230000  | 1.710641000  |
| C  | -0.970141000 | 0.752053000  | -0.655433000 |
| H  | 0.628818000  | 1.881750000  | 0.438898000  |
| C  | -2.010458000 | 0.044010000  | 1.303198000  |
| H  | -0.635850000 | 1.148269000  | 2.671294000  |
| C  | -2.152480000 | 0.071575000  | -0.026885000 |
| H  | -2.705887000 | -0.409894000 | 1.995201000  |
| H  | -2.956618000 | -0.359954000 | -0.602609000 |
| Br | 2.815702000  | -0.413943000 | -0.309678000 |
| H  | -0.499072000 | 0.180569000  | -1.446878000 |
| N  | -1.433241000 | 2.054978000  | -1.325006000 |
| C  | -1.213044000 | 2.355035000  | -2.630743000 |
| C  | -2.159503000 | 2.878572000  | -0.540706000 |
| C  | -1.820596000 | 3.491321000  | -3.158953000 |
| C  | -2.734060000 | 4.023940000  | -1.023485000 |
| H  | -2.266376000 | 2.552338000  | 0.483020000  |
| C  | -2.581224000 | 4.326412000  | -2.370094000 |
| H  | -1.638454000 | 3.723160000  | -4.197253000 |
| H  | -3.299855000 | 4.655381000  | -0.356901000 |
| H  | -3.032552000 | 5.213312000  | -2.791024000 |
| C  | -0.291631000 | 1.563758000  | -3.464612000 |
| C  | -0.599070000 | 1.282603000  | -4.792358000 |
| N  | 0.866955000  | 1.229363000  | -2.890298000 |
| C  | 0.348402000  | 0.617627000  | -5.553666000 |

|   |              |              |              |
|---|--------------|--------------|--------------|
| H | -1.556436000 | 1.558393000  | -5.212565000 |
| C | 1.769248000  | 0.603779000  | -3.635541000 |
| C | 1.556427000  | 0.278993000  | -4.970322000 |
| H | 0.143075000  | 0.370385000  | -6.585418000 |
| H | 2.695831000  | 0.349887000  | -3.134826000 |
| H | 2.323418000  | -0.232255000 | -5.533225000 |

52

structure of IM2:bipy

|    |              |              |             |
|----|--------------|--------------|-------------|
| Ir | 0.354569000  | 13.033477000 | 5.961423000 |
| C  | 2.484066000  | 11.069040000 | 7.024046000 |
| H  | 3.323950000  | 10.799587000 | 6.386906000 |
| H  | 2.443133000  | 10.299428000 | 7.791833000 |
| C  | 2.711611000  | 12.429882000 | 7.685775000 |
| H  | 2.199408000  | 12.449594000 | 8.649259000 |
| H  | 3.770558000  | 12.584938000 | 7.914931000 |
| C  | 2.201831000  | 13.580571000 | 6.857800000 |
| H  | 2.078098000  | 14.502201000 | 7.422579000 |
| C  | 2.363922000  | 13.706488000 | 5.460261000 |
| H  | 2.334518000  | 14.718688000 | 5.081367000 |
| C  | 3.138494000  | 12.740602000 | 4.587955000 |
| H  | 3.938858000  | 12.278192000 | 5.162748000 |
| H  | 3.636611000  | 13.299321000 | 3.797471000 |
| C  | 2.230382000  | 11.682996000 | 3.960735000 |
| H  | 1.806977000  | 12.069451000 | 3.033249000 |
| H  | 2.801448000  | 10.794871000 | 3.673843000 |
| C  | 1.097819000  | 11.287705000 | 4.856403000 |
| H  | 0.225133000  | 10.884714000 | 4.353684000 |
| C  | 1.193011000  | 11.041658000 | 6.237087000 |
| H  | 0.389222000  | 10.449621000 | 6.660961000 |
| C  | -0.596092000 | 14.983399000 | 5.985231000 |
| C  | -0.597519000 | 14.551205000 | 4.632946000 |
| H  | -1.449908000 | 14.895676000 | 6.642112000 |
| H  | -1.387695000 | 13.974937000 | 4.174739000 |
| Br | -1.924092000 | 12.058969000 | 6.170798000 |
| C  | 0.247164000  | 15.452879000 | 3.859118000 |
| C  | 0.699792000  | 16.450230000 | 4.631086000 |
| C  | 0.246949000  | 16.241611000 | 6.046851000 |
| H  | 1.382769000  | 17.235156000 | 4.340102000 |
| H  | 1.099995000  | 16.172324000 | 6.720975000 |
| H  | 0.487909000  | 15.314313000 | 2.815084000 |
| N  | -0.556580000 | 17.411772000 | 6.571772000 |
| C  | -0.450759000 | 17.841059000 | 7.858053000 |
| C  | -1.377863000 | 18.035664000 | 5.701704000 |

|   |              |              |              |
|---|--------------|--------------|--------------|
| C | -1.127235000 | 18.995749000 | 8.229306000  |
| C | 0.290097000  | 17.055382000 | 8.863536000  |
| C | -2.093458000 | 19.150271000 | 6.055451000  |
| H | -1.403765000 | 17.606384000 | 4.711140000  |
| C | -1.945201000 | 19.659147000 | 7.337329000  |
| H | -1.030654000 | 19.332502000 | 9.250442000  |
| C | 1.130643000  | 17.677321000 | 9.781098000  |
| N | 0.020614000  | 15.745949000 | 8.883681000  |
| H | -2.741576000 | 19.614198000 | 5.328771000  |
| H | -2.477870000 | 20.548102000 | 7.642897000  |
| C | 1.724672000  | 16.894465000 | 10.758066000 |
| H | 1.327796000  | 18.738868000 | 9.722645000  |
| C | 0.579498000  | 15.014880000 | 9.839870000  |
| C | 1.440156000  | 15.540449000 | 10.795799000 |
| H | 2.394736000  | 17.338870000 | 11.479977000 |
| H | 0.321645000  | 13.961777000 | 9.840932000  |
| H | 1.872589000  | 14.900313000 | 11.550639000 |
